# Supplementary material for: The Stroma Liquid Biopsy Panel Contains a Stromal-Epithelial Gene Signature Ratio That Is Associated with the Histologic Tumor-Stroma Ratio and Predicts Survival in Colon Cancer
Source: MDPI journal article supplement (doi:10.3390/cancers14010163), 2021-12-29
Supplement: s1 [file s1]

Supplement to:

**The Stroma Liquid Biopsy panel contains a stromal-epithelial gene signature ratio that is associated with the histologic tumor-stroma ratio and predicts survival in colon cancer**

C.J. Ravensbergen<sup>1</sup>, M. Kuruc<sup>2</sup>, M. Polack<sup>1</sup>, A.S.L.P. Crobach<sup>3</sup>, H. Putter<sup>4</sup>, A.J. Gelderblom<sup>5</sup>, D. Roy<sup>6</sup>, R.A.E.M. Tollenaar<sup>1†</sup> & W.E. Mesker<sup>1†\*</sup>

<sup>1</sup>Department of Surgery, Leiden University Medical Center, Leiden, the Netherlands

<sup>2</sup>Biotech Support Group LLC, Monmouth Junction, USA

<sup>3</sup>Department of Pathology, Leiden University Medical Center, Leiden, the Netherlands

<sup>4</sup>Department of Medical Statistics, Leiden University Medical Center, Leiden, the Netherlands

<sup>5</sup>Department of Medical Oncology, Leiden University Medical Center, Leiden, the Netherlands

<sup>6</sup>Hospital medicine, Nathan Littauer Hospital, Gloversville, USA

<sup>†</sup>Contributed equally

<sup>\*</sup>Correspondence to: Dr Wilma E. Mesker, Department of Surgery, Leiden University Medical Center, Albinusdreef 2, Leiden, 2300RC, the Netherlands. Tel: +31715262987. Mail: W.E.Mesker@lumc.nl

$$\left[ \frac{\text{Stromal risk score} = \sum_{i=1}^n \beta_i * E_i}{\text{Epithelial risk score} = \sum_{j=1}^n \beta_j * E_j} \right]^2$$

---

**Supplementary Figure S1.** The equation for the stromal-epithelial ratio-risk score. In the above equation, n is the number of genes in the Stromal signature (i) or the Epithelial signature (j);  $\beta$  represents the regression coefficient and E represents the absolute expression value of the gene.

A

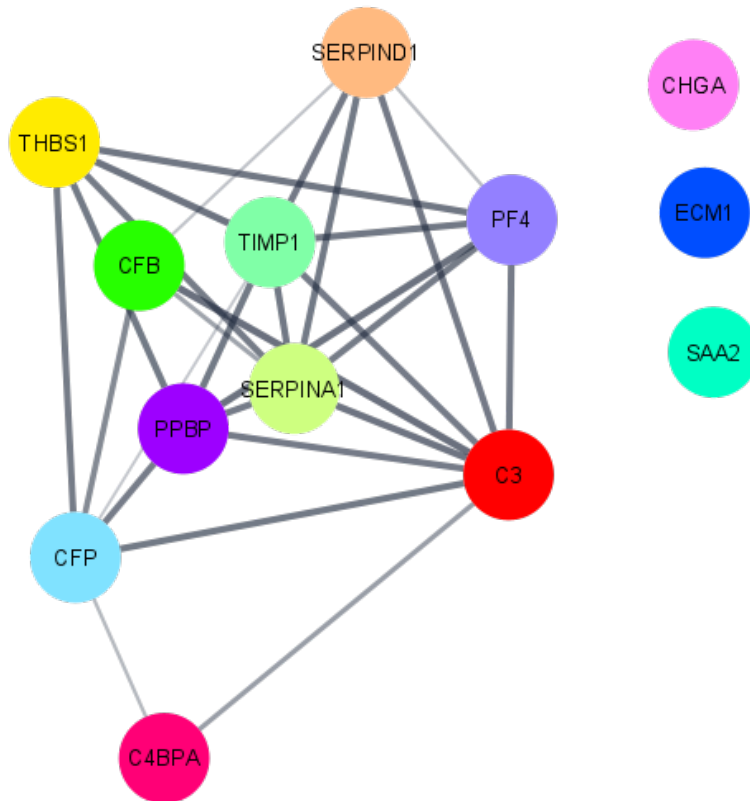

B

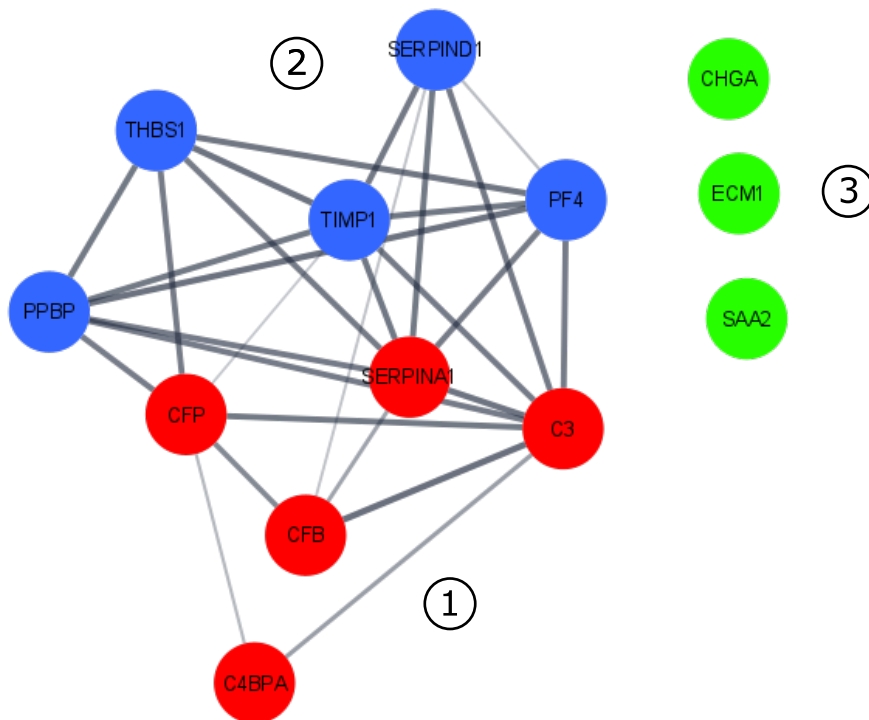

**Supplementary Figure S2.** Protein-protein interaction (PPI) networks of the Stromal Liquid Biopsy (SLB) gene set. **(A)** PPI displaying functional interactions between the SLB genes. Thickness of the edges represents the strength of scientific evidence. **(B)** The PPI network stratified into three clusters based on K-means clustering. The clusters demonstrate similar content as the functional annotations described in *Table 1*.

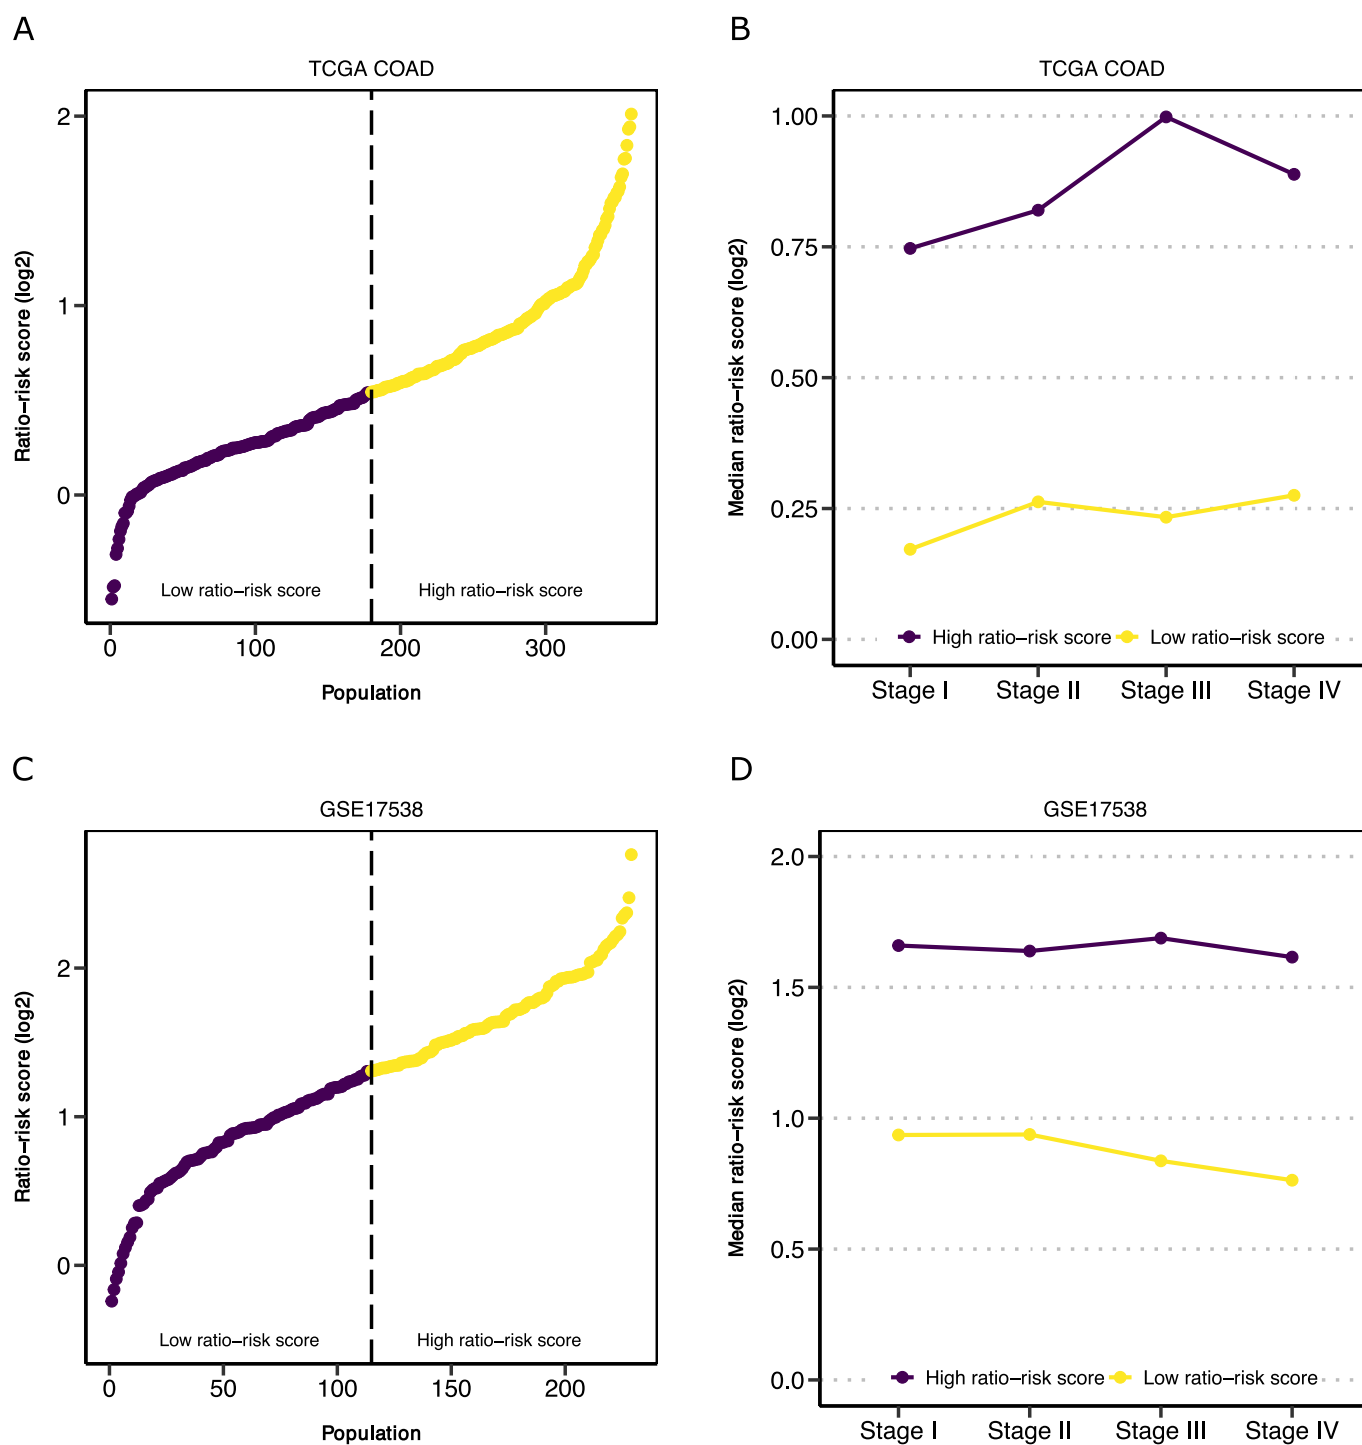

**Supplementary Figure S3.** Distribution of stromal-epithelial ratio-risk scores. The 50<sup>th</sup> percentile (median) was used to categorize patients into high and low ratio-risk scores in **(A)** the TCGA Pan-Cancer COAD discovery cohort and **(C)** the GSE17538 validation cohort. Median ratio-risk score stratified by stage is displayed for **(B)** the TCGA Pan-Cancer COAD cohort and **(D)** the GSE17538 cohort.

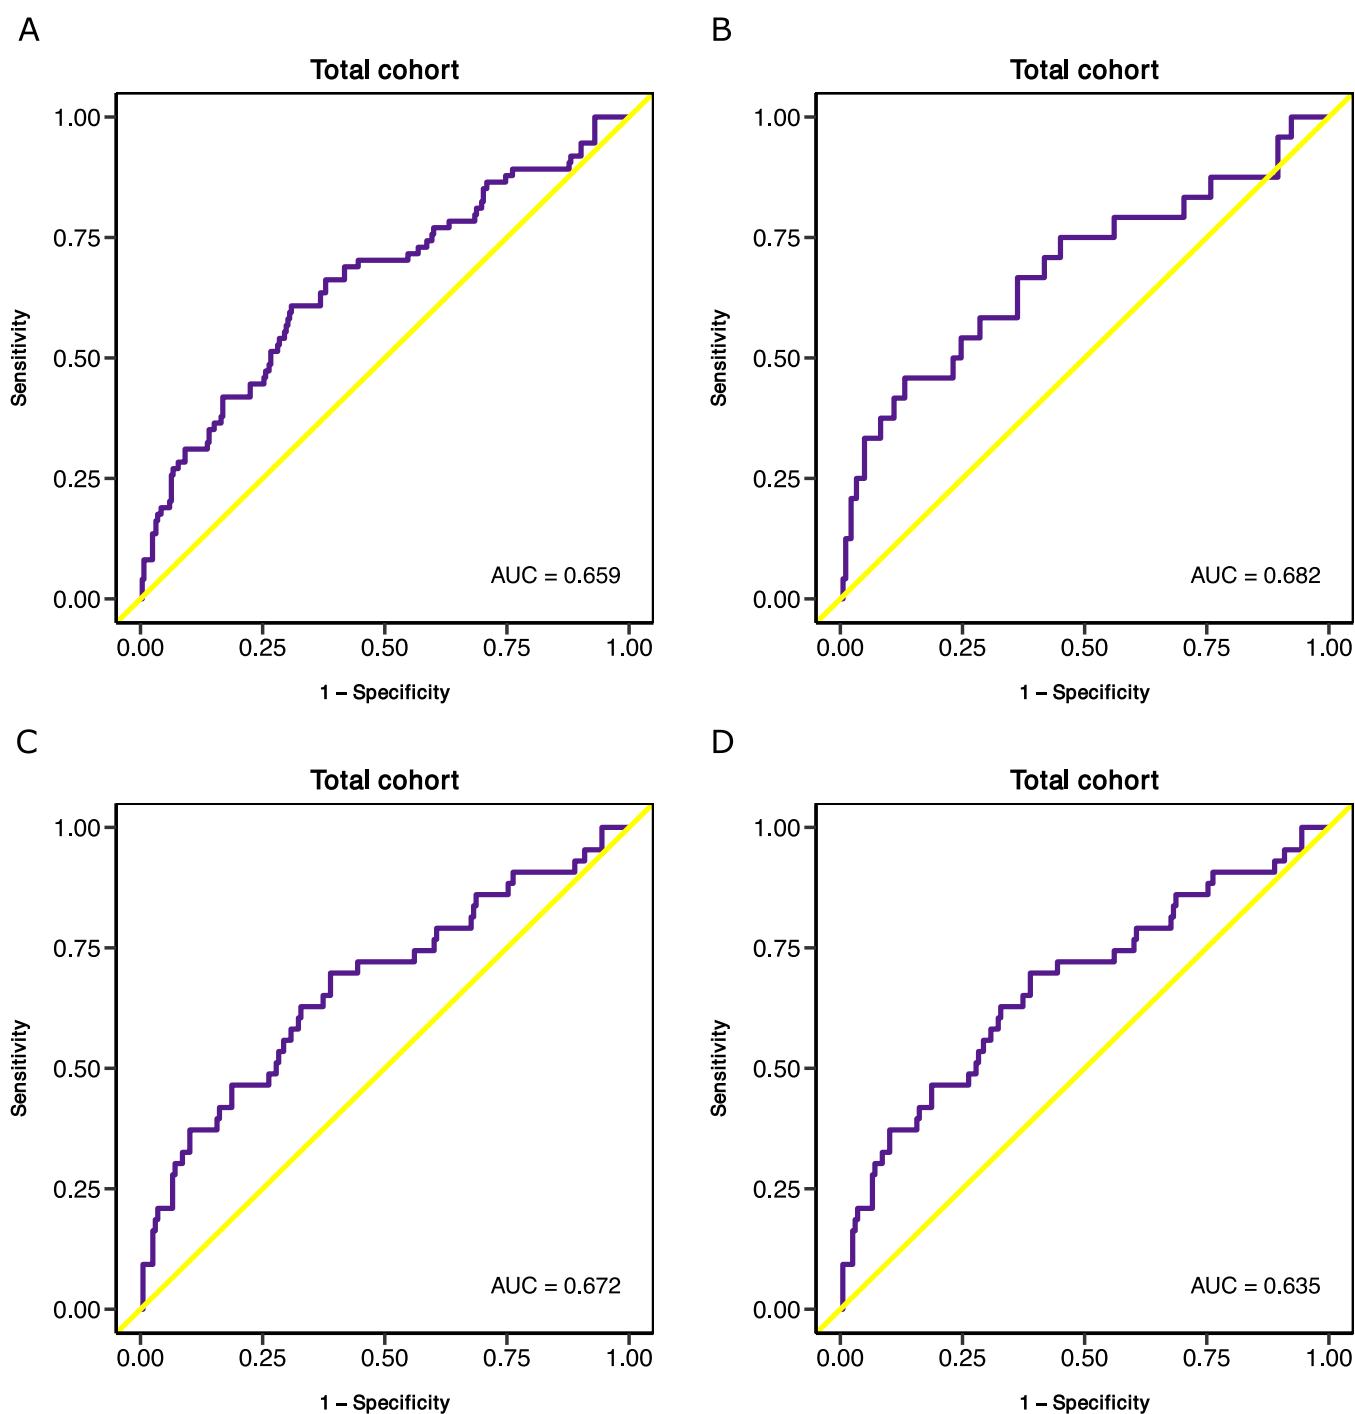

**Supplementary Figure S4.** Area under the receiver operating characteristic curve (AUC) of the stromal-epithelial ratio-risk score for (A) the TCGA Pan-Cancer COAD total cohort, (B) stage I/II, (C) stage II/III and, (D) stage III/IV subpopulations.

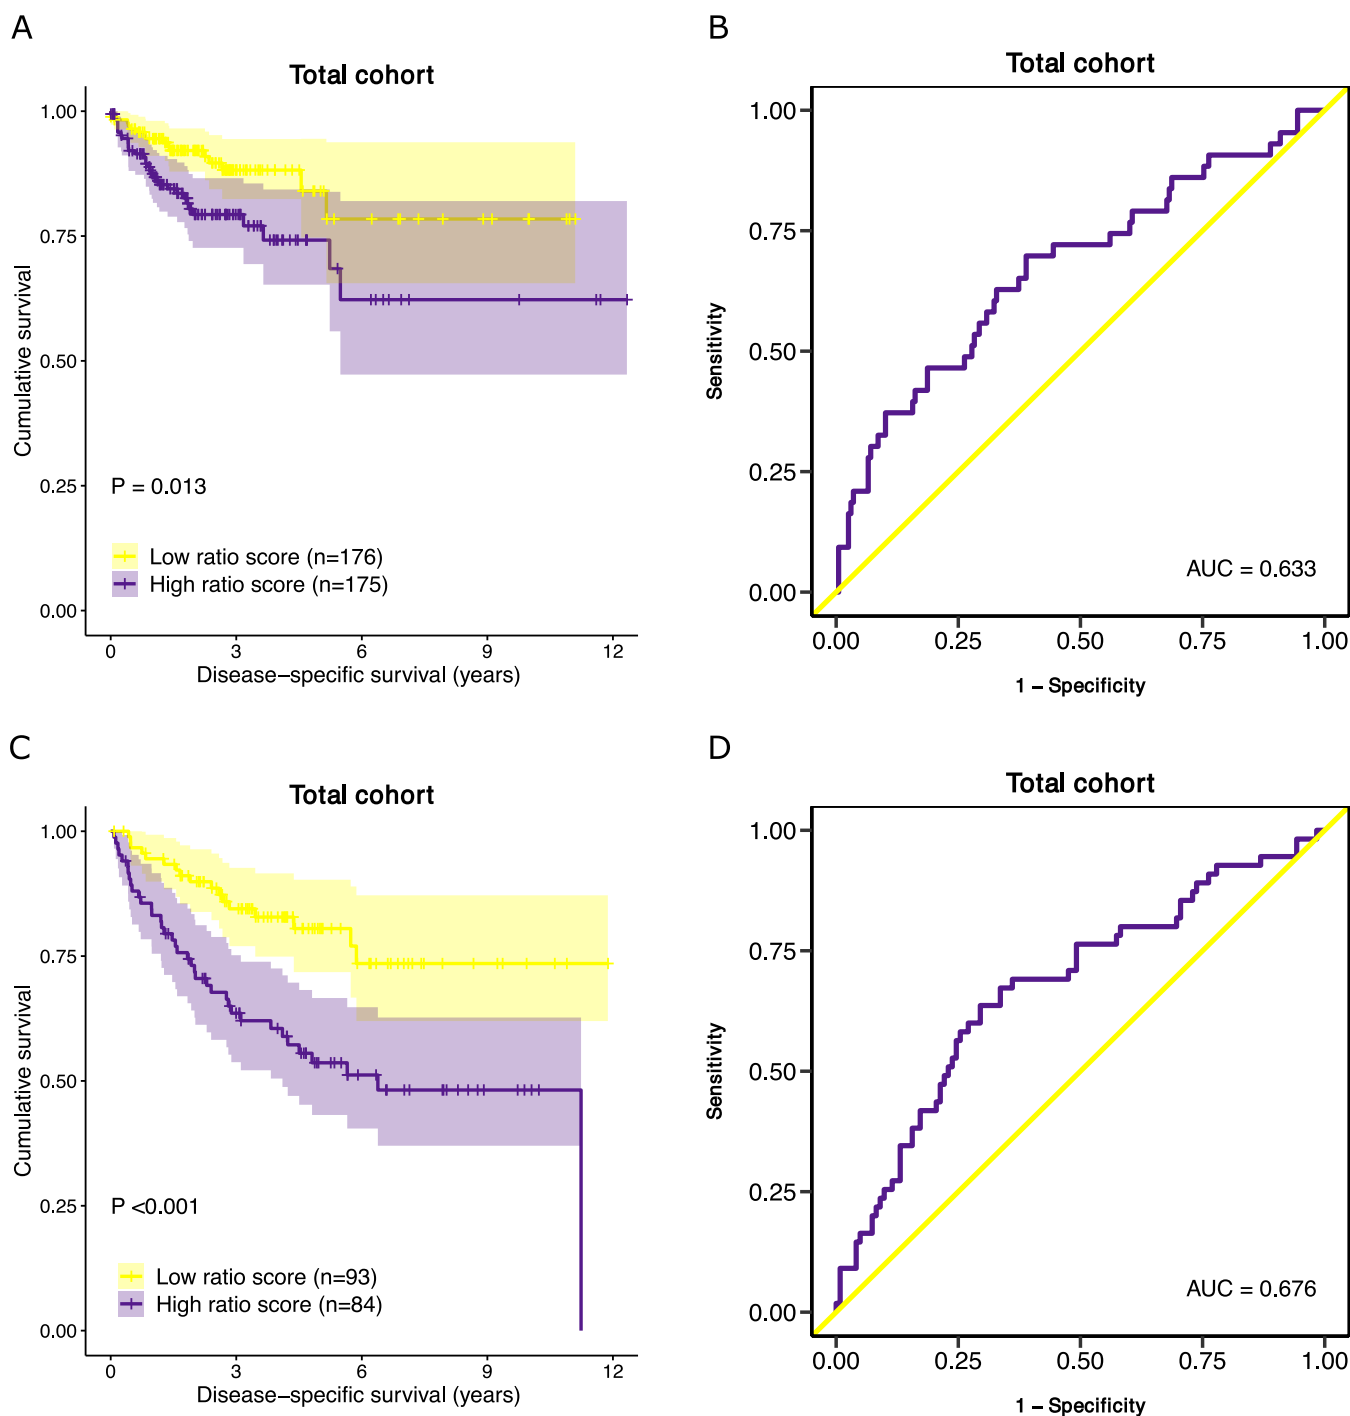

**Supplementary Figure S5.** Disease-specific survival (DSS) in the TCGA Pan-Cancer COAD discovery cohort and the GSE17538 validation cohorts. **(A)** Kaplan-Meier curve of the DSS for the total TCGA COAD cohort (n = 351) and **(B)** the corresponding area under the receiver operating characteristic curve (AUC). **(C)** Kaplan-Meier curve of the DSS for the available data of the GSE17538 cohort (n = 177) and **(D)** the corresponding AUC.

**Supplementary Table S1.** Baseline characteristics of the TCGA COAD discovery cohort and the GSE17538 validation cohort. NA, not applicable.

|                                   | TCGA COAD<br>(n = 359) | GSE17538<br>(n = 229) | P-value             |
|-----------------------------------|------------------------|-----------------------|---------------------|
| Age (%)                           |                        |                       |                     |
| <60                               | 98 (27.3)              | 79 (34.5)             | 0.051 <sup>†</sup>  |
| 60-75                             | 159 (44.3)             | 100 (43.7)            |                     |
| >75                               | 102 (28.4)             | 50 (21.8)             |                     |
| Gender (%)                        |                        |                       |                     |
| Female                            | 168 (46.8)             | 109 (47.6)            | 0.894 <sup>‡</sup>  |
| Male                              | 191 (53.2)             | 120 (52.4)            |                     |
| Histologic subtype (%)            |                        |                       |                     |
| Adenocarcinoma                    | 359 (100)              | 229 (100)             | NA                  |
| Other                             | 0 (0)                  | 0 (0)                 |                     |
| TNM (%)                           |                        |                       |                     |
| I                                 | 64 (17.8)              | 28 (12.2)             | 0.803 <sup>†</sup>  |
| II                                | 142 (39.6)             | 70 (30.6)             |                     |
| III                               | 99 (27.6)              | 76 (33.2)             |                     |
| IV                                | 54 (15.0)              | 55 (24.0)             |                     |
| Neoadjuvant therapy (%)           |                        |                       |                     |
| Yes                               | 0 (0)                  | 0 (0)                 | NA                  |
| No                                | 359 (100)              | 229 (100)             |                     |
| Radiation therapy (%)             |                        |                       |                     |
| Yes                               | 6 (1.7)                | 0 (0)                 | NA                  |
| No                                | 300 (83.6)             | 0 (0)                 |                     |
| Missing                           | 53 (14.7)              | 229 (100)             |                     |
| Systemic therapy (%)              |                        |                       |                     |
| Chemotherapy                      | 89 (24.8)              | 0 (0)                 | NA                  |
| Chemo + molecular therapy         | 31 (8.6)               | 0 (0)                 |                     |
| Missing                           | 239 (66.6)             | 229 (100)             |                     |
| Median follow-up time<br>(months) | 22.3                   | 46.5                  | <0.001 <sup>§</sup> |

<sup>†</sup>Chi-squared test

<sup>‡</sup>Fisher's exact test

<sup>§</sup>Mann-Whitney U test

**Supplementary Table S2.** Regression coefficients as computed for the TCGA Pan-Cancer COAD cohort and GEO17538 validation cohort.

| Stromal signature |              |          | Epithelial signature |              |          |
|-------------------|--------------|----------|----------------------|--------------|----------|
| Gene              | TCGA<br>COAD | GEO17538 | Gene                 | TCGA<br>COAD | GEO17538 |
| C3                | 0.058        | -0.178   | C4BPA                | 0.051        | 0.002    |
| CFP               | -0.155       | -0.753   | CFB                  | -0.096       | 0.002    |
| ECM1              | -0.165       | -0.067   | CHGA                 | 0.035        | 0.102    |
| THBS1             | 0.090        | 0.379    | PF4                  | -0.178       | -0.613   |
| TIMP1             | 0.416        | 0.658    | PPBP                 | 0.055        | 0.12     |
|                   |              |          | SAA2                 | 0.116        | -0.074   |
|                   |              |          | SERPINA1             | -0.192       | 0.128    |
|                   |              |          | SERPIND1             | -0.115       | -0.039   |



**Supplementary Table S3.** Functional enrichment analysis demonstrating the top five tumor-associated gene ontology (GO) biological processes associated with the Stroma Liquid Biopsy panel gene set. FDR, false discovery rate.

| GO Biological Process                                    | Fold enrichment | Involved genes                          | FDR      |
|----------------------------------------------------------|-----------------|-----------------------------------------|----------|
| GO:0006957<br>Complement activation, alternative pathway | >100            | C3, CFB, CFP                            | 1.93E-04 |
| GO:0002576<br>Platelet degranulation                     | 74.26           | ECM1, PF4, PPBP, SERPINA1, THBS1, TIMP1 | 4.40E-07 |
| GO:0030449<br>Regulation of complement activation        | 54.16           | C3, C4BPA, CFB, CFP                     | 6.44E-04 |
| GO:0097529<br>Myeloid leukocyte migration                | 38.02           | CHGA, PF4, PPBP                         | 1.87E-02 |
| GO:0045766<br>Positive regulation of angiogenesis        | 30.47           | C3, ECM1, THBS1                         | 3.26E-02 |

**Supplementary Table S4.** Network statistics of hub genes displaying node degree count, centrality statistics and assigned K-means cluster.

| Gene/Protein | Degree | Closeness centrality | Betweenness centrality | Assigned to cluster |
|--------------|--------|----------------------|------------------------|---------------------|
| C3           | 8      | 0.90                 | 0.18                   | 1                   |
| TIMP1        | 7      | 0.82                 | 0.04                   | 2                   |
| SERPINA1     | 7      | 0.82                 | 0.06                   | 1                   |
| PPBP         | 6      | 0.75                 | 0.02                   | 2                   |
| PF4          | 6      | 0.75                 | 0.02                   | 2                   |
| CFP          | 6      | 0.75                 | 0.11                   | 1                   |
| THBS1        | 5      | 0.69                 | 0.01                   | 2                   |
| SERPIND1     | 5      | 0.69                 | 0.02                   | 2                   |
| CFB          | 4      | 0.64                 | 0.01                   | 1                   |
| C4BPA        | 2      | 0.56                 | 0                      | 1                   |
| CHGA         | 0      | 0                    | 0                      | 3                   |
| ECM1         | 0      | 0                    | 0                      | 3                   |
| SAA2         | 0      | 0                    | 0                      | 3                   |

**Supplementary Table S5.** Baseline characteristics of the stroma-high and stroma-low populations from the TCGA Pan-Cancer COAD cohort, as scored by the tumor-stroma ratio.

|              | Stroma-high<br>(n = 131) | Stroma-low<br>(n = 202) | P-value            |
|--------------|--------------------------|-------------------------|--------------------|
| Age (%)      |                          |                         |                    |
| <60          | 43 (32.8)                | 48 (23.8)               | 0.617 <sup>†</sup> |
| 60-75        | 52 (39.7)                | 96 (47.5)               |                    |
| >75          | 36 (27.5)                | 58 (28.7)               |                    |
| Gender (%)   |                          |                         |                    |
| Female       | 69 (52.7)                | 96 (47.5)               | 0.862 <sup>‡</sup> |
| Male         | 62 (47.3)                | 106 (52.5)              |                    |
| pTNM (%)     |                          |                         |                    |
| I            | 21 (16.0)                | 39 (19.3)               | 0.896 <sup>†</sup> |
| II           | 54 (41.2)                | 76 (37.6)               |                    |
| III          | 37 (28.2)                | 58 (28.7)               |                    |
| IV           | 19 (14.5)                | 29 (14.4)               |                    |
| pT-stage (%) |                          |                         |                    |
| T1           | 2 (1.5)                  | 7 (3.5)                 | 0.345 <sup>†</sup> |
| T2           | 21 (16.0)                | 39 (19.3)               |                    |
| T3           | 91 (69.5)                | 138 (68.3)              |                    |
| T4           | 17 (13.0)                | 18 (8.9)                |                    |
| pN-stage (%) |                          |                         |                    |
| N0           | 76 (58.0)                | 120 (59.4)              | 0.852 <sup>†</sup> |
| N1           | 38 (29.0)                | 43 (21.3)               |                    |
| N2           | 17 (13.0)                | 39 (19.3)               |                    |

<sup>†</sup>Chi-squared test

<sup>‡</sup>Fisher's exact test

**Supplementary Table S6.** Cox proportional hazards model of univariate and multivariate analyses for the overall survival of colon adenocarcinoma patients from the TCGA Pan-Cancer COAD cohort. HR, hazard ratio; CI, confidence interval.

| Overall survival |     |                     |             |         |                       |             |         |
|------------------|-----|---------------------|-------------|---------|-----------------------|-------------|---------|
|                  | n   | Univariate analysis |             |         | Multivariate analysis |             |         |
|                  |     | HR                  | 95% CI      | P-value | HR                    | 95% CI      | P-value |
| Age              |     |                     |             |         |                       |             |         |
| <60              | 98  |                     |             | 0.031   |                       |             | 0.007   |
| 60-75            | 159 | 1.479               | 0.785-2.788 |         | 2.059                 | 1.057-4.011 |         |
| >75              | 102 | 2.287               | 1.207-4.334 |         | 2.977                 | 1.503-5.897 |         |
| Gender           |     |                     |             |         |                       |             |         |
| Female           | 168 |                     |             | 0.294   |                       |             | 0.995   |
| Male             | 191 | 1.282               | 0.806-2.041 |         | 1.002                 | 0.617-1.627 |         |
| pTNM             |     |                     |             |         |                       |             |         |
| I                | 64  |                     |             | <0.001  |                       |             |         |
| II               | 142 | 1.324               | 0.614-5.309 |         |                       |             |         |
| III              | 99  | 2.433               | 1.143-9.601 |         |                       |             |         |
| IV               | 54  | 7.399               | 3.420-28.03 |         |                       |             |         |
| pT-stage         |     |                     |             |         |                       |             |         |
| T1               | 9   |                     |             | <0.001  |                       |             | 0.010   |
| T2               | 64  | 0.593               | 0.061-5.744 |         | 0.353                 | 0.036-3.485 |         |
| T3               | 246 | 2.226               | 0.307-16.12 |         | 1.014                 | 0.135-7.636 |         |
| T4               | 40  | 6.755               | 0.888-51.39 |         | 2.281                 | 0.284-18.35 |         |
| pN-stage         |     |                     |             |         |                       |             |         |
| N0               | 214 |                     |             | <0.001  |                       |             | <0.001  |
| N1               | 84  | 1.959               | 1.112-3.451 |         | 1.931                 | 1.061-3.512 |         |
| N2               | 61  | 3.908               | 2.275-6.715 |         | 3.638                 | 2.027-6.532 |         |
| Ratio-risk score | 179 |                     |             | <0.001  |                       |             | <0.001  |
| Low              | 180 | 2.581               | 1.567-4.251 |         | 2.586                 | 1.561-4.286 |         |
| High             |     |                     |             |         |                       |             |         |

**Supplementary Table S7.** Baseline characteristics of the high ratio-risk score and the low ratio-risk score tumor populations from the TCGA Pan-Cancer COAD cohort.

|              | High ratio-risk score<br>(n = 180) | Low ratio-risk score<br>(n = 179) | P-value            |
|--------------|------------------------------------|-----------------------------------|--------------------|
| Age (%)      |                                    |                                   |                    |
| <60          | 47 (26.1)                          | 51 (28.5)                         | 0.656 <sup>†</sup> |
| 60-75        | 78 (43.3)                          | 81 (45.3)                         |                    |
| >75          | 55 (30.6)                          | 47 (26.2)                         |                    |
| Gender (%)   |                                    |                                   |                    |
| Female       | 90 (50.0)                          | 78 (43.6)                         | 0.265 <sup>‡</sup> |
| Male         | 90 (50.0)                          | 101 (56.4)                        |                    |
| pTNM (%)     |                                    |                                   |                    |
| I            | 29 (16.1)                          | 35 (19.5)                         | 0.442 <sup>†</sup> |
| II           | 72 (40.0)                          | 70 (39.1)                         |                    |
| III          | 47 (26.1)                          | 52 (29.1)                         |                    |
| IV           | 32 (17.8)                          | 22 (12.3)                         |                    |
| pT-stage (%) |                                    |                                   |                    |
| T1           | 4 (2.2)                            | 5 (2.8)                           | 0.227 <sup>†</sup> |
| T2           | 29 (16.1)                          | 35 (19.6)                         |                    |
| T3           | 121 (67.2)                         | 125 (69.8)                        |                    |
| T4           | 26 (14.5)                          | 14 (7.8)                          |                    |
| pN-stage (%) |                                    |                                   |                    |
| N0           | 104 (57.8)                         | 110 (61.5)                        | 0.778 <sup>†</sup> |
| N1           | 44 (24.4)                          | 40 (22.3)                         |                    |
| N2           | 32 (17.8)                          | 29 (16.2)                         |                    |

<sup>†</sup>Chi-squared test

<sup>‡</sup>Fisher's exact test

**Supplementary Table S8.** Cox proportional hazards model of univariate and multivariate analyses for the disease-specific survival of colon adenocarcinoma patients from the TCGA Pan-Cancer COAD cohort. HR, hazard ratio; CI, confidence interval.

| Disease-specific survival |                     |       |             |         |                       |             |         |
|---------------------------|---------------------|-------|-------------|---------|-----------------------|-------------|---------|
|                           | Univariate analysis |       |             |         | Multivariate analysis |             |         |
|                           | n                   | HR    | 95% CI      | P-value | HR                    | 95% CI      | P-value |
| Age                       |                     |       |             |         |                       |             |         |
| <60                       | 98                  |       |             | 0.508   |                       |             | 0.275   |
| 60-75                     | 153                 | 1.036 | 0.513-2.091 |         | 1.444                 | 0.696-2.997 |         |
| >75                       | 100                 | 1.445 | 0.701-2.980 |         | 1.879                 | 0.870-4.058 |         |
| Gender                    |                     |       |             |         |                       |             |         |
| Female                    | 167                 |       |             | 0.730   |                       |             | 0.806   |
| Male                      | 184                 | 1.103 | 0.631-1.928 |         | 0.929                 | 0.518-1.668 |         |
| pTNM                      |                     |       |             |         |                       |             |         |
| I                         | 64                  |       |             | <0.001  |                       |             |         |
| II                        | 137                 | 1.536 | 0.319-7.406 |         |                       |             |         |
| III                       | 96                  | 4.491 | 1.020-19.77 |         |                       |             |         |
| IV                        | 54                  | 19.89 | 4.723-83.75 |         |                       |             |         |
| pT-stage                  |                     |       |             |         |                       |             |         |
| T1                        | 9                   |       |             | <0.001  |                       |             | 0.012   |
| T2                        | 64                  | 0.175 | 0.011-2.818 |         | 0.122                 | 0.007-2.001 |         |
| T3                        | 238                 | 1.473 | 0.201-10.80 |         | 0.642                 | 0.082-5.027 |         |
| T4                        | 40                  | 5.239 | 0.681-40.32 |         | 1.589                 | 0.187-13.48 |         |
| pN-stage                  |                     |       |             |         |                       |             |         |
| N0                        | 209                 |       |             | <0.001  |                       |             | <0.001  |
| N1                        | 83                  | 3.263 | 1.584-6.721 |         | 2.725                 | 1.275-5.825 |         |
| N2                        | 59                  | 6.366 | 3.163-12.82 |         | 5.218                 | 2.460-11.07 |         |
| Ratio-risk score          |                     |       |             |         |                       |             |         |
| Low                       | 176                 |       |             | 0.013   |                       |             | 0.014   |
| High                      | 175                 | 2.099 | 1.169-3.770 |         | 2.107                 | 1.162-3.817 |         |

**Supplementary Table S9.** Cox proportional hazards model of univariate and multivariate analyses for the overall survival of colon adenocarcinoma patients from the GSE17538 cohort. HR, hazard ratio; CI, confidence interval.

| Overall survival |                     |       |             |         |                       |             |         |
|------------------|---------------------|-------|-------------|---------|-----------------------|-------------|---------|
|                  | Univariate analysis |       |             |         | Multivariate analysis |             |         |
|                  | n                   | HR    | 95% CI      | P-value | HR                    | 95% CI      | P-value |
| Age              |                     |       |             |         |                       |             |         |
| <60              | 79                  |       |             | 0.012   |                       |             | <0.001  |
| 60-75            | 100                 | 0.822 | 0.505-1.338 |         | 1.560                 | 0.926-2.626 |         |
| >75              | 50                  | 1.772 | 1.047-3.000 |         | 3.417                 | 1.977-5.906 |         |
| Gender           |                     |       |             |         |                       |             |         |
| Female           | 109                 |       |             | 0.793   |                       |             |         |
| Male             | 120                 | 0.946 | 0.625-1.431 |         |                       |             |         |
| pTNM             |                     |       |             |         |                       |             |         |
| I                | 28                  |       |             | <0.001  |                       |             | <0.001  |
| II               | 70                  | 1.761 | 0.582-5.330 |         | 1.798                 | 0.592-5.458 |         |
| III              | 76                  | 3.310 | 1.142-9.595 |         | 3.509                 | 1.203-10.23 |         |
| IV               | 55                  | 12.91 | 4.546-36.67 |         | 14.16                 | 4.915-40-78 |         |
| Ratio-risk score | 114                 |       |             | <0.001  |                       |             | <0.001  |
| Low              | 115                 | 2.590 | 1.659-4.043 |         | 2.363                 | 1.485-3.760 |         |
| High             |                     |       |             |         |                       |             |         |

**Supplementary Table S10.** Cox proportional hazards model of univariate and multivariate analyses for the disease-specific survival of colon adenocarcinoma patients from the GSE17538 cohort. HR, hazard ratio; CI, confidence interval.

| Disease-specific survival |                     |       |             |         |                       |              |         |
|---------------------------|---------------------|-------|-------------|---------|-----------------------|--------------|---------|
|                           | Univariate analysis |       |             |         | Multivariate analysis |              |         |
|                           | n                   | HR    | 95% CI      | P-value | HR                    | 95% CI       | P-value |
| Age                       |                     |       |             |         |                       |              |         |
| <60                       | 55                  |       |             | 0.387   |                       |              | 0.168   |
| 60-75                     | 80                  | 0.672 | 0.369-1.224 |         | 1.192                 | 0.630-2.254  |         |
| >75                       | 42                  | 0.949 | 0.464-1.940 |         | 2.033                 | 0.959-4.311  |         |
| Gender                    |                     |       |             |         |                       |              |         |
| Female                    | 81                  |       |             | 0.534   |                       |              | 0.725   |
| Male                      | 96                  | 1.187 | 0.692-2.035 |         | 0.901                 | 1.647-5.628  |         |
| pTNM                      |                     |       |             |         |                       |              |         |
| I                         | 24                  |       |             | <0.001  |                       |              | <0.001  |
| II                        | 57                  | 4.734 | 0.595-37.65 |         | 3.826                 | 0.476-30.73  |         |
| III                       | 57                  | 9.863 | 1.271-76.56 |         | 7.650                 | 0.992-59.02  |         |
| IV                        | 39                  | 49.79 | 6.516-380.5 |         | 49.44                 | 6.486-376.80 |         |
| Ratio-risk score          | 93                  |       |             | <0.001  |                       |              | <0.001  |
| Low                       | 84                  | 2.729 | 1.540-4.838 |         | 3.045                 | 1.647-5.628  |         |
| High                      |                     |       |             |         |                       |              |         |
