# Supplementary material for: The Stroma Liquid Biopsy Panel Contains a Stromal-Epithelial Gene Signature Ratio That Is Associated with the Histologic Tumor-Stroma Ratio and Predicts Survival in Colon Cancer
Source: Cancers (Basel). 2021 Dec 29;14(1):163. doi: 10.3390/cancers14010163 (PMC8750571; doi:10.3390/cancers14010163)
Supplement: Supplementary file 1 [file cancers-14-00163-s001.zip › SupplementaryData1_cohort_scores.xlsx]

## Sheet: TCGA_patientID
Supplementary Data 1
Designations of coloncarcinoma patients (n=359) from the TCGA Pan-Cancer Atlas included in this study
Patient_ID
TCGA-3L-AA1B-01
TCGA-4N-A93T-01
TCGA-5M-AAT4-01
TCGA-5M-AAT6-01
TCGA-5M-AATE-01
TCGA-A6-2671-01
TCGA-A6-2672-01
TCGA-A6-2675-01
TCGA-A6-2676-01
TCGA-A6-2677-01
TCGA-A6-2678-01
TCGA-A6-2679-01
TCGA-A6-2680-01
TCGA-A6-2681-01
TCGA-A6-2682-01
TCGA-A6-2683-01
TCGA-A6-2684-01
TCGA-A6-2685-01
TCGA-A6-2686-01
TCGA-A6-3807-01
TCGA-A6-3808-01
TCGA-A6-3810-01
TCGA-A6-4105-01
TCGA-A6-4107-01
TCGA-A6-5656-01
TCGA-A6-5657-01
TCGA-A6-5659-01
TCGA-A6-5660-01
TCGA-A6-5661-01
TCGA-A6-5662-01
TCGA-A6-5664-01
TCGA-A6-5665-01
TCGA-A6-5666-01
TCGA-A6-5667-01
TCGA-A6-6137-01
TCGA-A6-6138-01
TCGA-A6-6140-01
TCGA-A6-6141-01
TCGA-A6-6142-01
TCGA-A6-6648-01
TCGA-A6-6649-01
TCGA-A6-6650-01
TCGA-A6-6651-01
TCGA-A6-6652-01
TCGA-A6-6653-01
TCGA-A6-6654-01
TCGA-A6-6782-01
TCGA-A6-A567-01
TCGA-A6-A56B-01
TCGA-A6-A5ZU-01
TCGA-AA-3488-01
TCGA-AA-3489-01
TCGA-AA-3492-01
TCGA-AA-3494-01
TCGA-AA-3495-01
TCGA-AA-3496-01
TCGA-AA-3502-01
TCGA-AA-3506-01
TCGA-AA-3510-01
TCGA-AA-3511-01
TCGA-AA-3514-01
TCGA-AA-3517-01
TCGA-AA-3518-01
TCGA-AA-3519-01
TCGA-AA-3520-01
TCGA-AA-3522-01
TCGA-AA-3524-01
TCGA-AA-3525-01
TCGA-AA-3526-01
TCGA-AA-3527-01
TCGA-AA-3529-01
TCGA-AA-3530-01
TCGA-AA-3531-01
TCGA-AA-3532-01
TCGA-AA-3534-01
TCGA-AA-3538-01
TCGA-AA-3542-01
TCGA-AA-3544-01
TCGA-AA-3548-01
TCGA-AA-3549-01
TCGA-AA-3552-01
TCGA-AA-3553-01
TCGA-AA-3560-01
TCGA-AA-3561-01
TCGA-AA-3655-01
TCGA-AA-3660-01
TCGA-AA-3663-01
TCGA-AA-3664-01
TCGA-AA-3666-01
TCGA-AA-3667-01
TCGA-AA-3673-01
TCGA-AA-3675-01
TCGA-AA-3678-01
TCGA-AA-3679-01
TCGA-AA-3680-01
TCGA-AA-3681-01
TCGA-AA-3685-01
TCGA-AA-3688-01
TCGA-AA-3693-01
TCGA-AA-3695-01
TCGA-AA-3696-01
TCGA-AA-3710-01
TCGA-AA-3712-01
TCGA-AA-3713-01
TCGA-AA-3715-01
TCGA-AA-3811-01
TCGA-AA-3812-01
TCGA-AA-3814-01
TCGA-AA-3818-01
TCGA-AA-3819-01
TCGA-AA-3831-01
TCGA-AA-3833-01
TCGA-AA-3841-01
TCGA-AA-3842-01
TCGA-AA-3844-01
TCGA-AA-3845-01
TCGA-AA-3846-01
TCGA-AA-3848-01
TCGA-AA-3850-01
TCGA-AA-3851-01
TCGA-AA-3855-01
TCGA-AA-3856-01
TCGA-AA-3858-01
TCGA-AA-3864-01
TCGA-AA-3866-01
TCGA-AA-3867-01
TCGA-AA-3869-01
TCGA-AA-3870-01
TCGA-AA-3872-01
TCGA-AA-3875-01
TCGA-AA-3930-01
TCGA-AA-3939-01
TCGA-AA-3941-01
TCGA-AA-3952-01
TCGA-AA-3955-01
TCGA-AA-3956-01
TCGA-AA-3968-01
TCGA-AA-3971-01
TCGA-AA-3973-01
TCGA-AA-3975-01
TCGA-AA-3976-01
TCGA-AA-3979-01
TCGA-AA-3980-01
TCGA-AA-3982-01
TCGA-AA-3984-01
TCGA-AA-3986-01
TCGA-AA-3989-01
TCGA-AA-A004-01
TCGA-AA-A00A-01
TCGA-AA-A00D-01
TCGA-AA-A00E-01
TCGA-AA-A00F-01
TCGA-AA-A00K-01
TCGA-AA-A00L-01
TCGA-AA-A00O-01
TCGA-AA-A00Q-01
TCGA-AA-A00R-01
TCGA-AA-A00U-01
TCGA-AA-A00W-01
TCGA-AA-A00Z-01
TCGA-AA-A010-01
TCGA-AA-A017-01
TCGA-AA-A01C-01
TCGA-AA-A01F-01
TCGA-AA-A01I-01
TCGA-AA-A01K-01
TCGA-AA-A01P-01
TCGA-AA-A01Q-01
TCGA-AA-A01S-01
TCGA-AA-A01T-01
TCGA-AA-A01V-01
TCGA-AA-A01X-01
TCGA-AA-A01Z-01
TCGA-AA-A022-01
TCGA-AA-A029-01
TCGA-AA-A02E-01
TCGA-AA-A02F-01
TCGA-AA-A02H-01
TCGA-AA-A02J-01
TCGA-AA-A02O-01
TCGA-AA-A02R-01
TCGA-AA-A02W-01
TCGA-AA-A02Y-01
TCGA-AA-A03J-01
TCGA-AD-6548-01
TCGA-AD-6888-01
TCGA-AD-6889-01
TCGA-AD-6895-01
TCGA-AD-6965-01
TCGA-AD-A5EJ-01
TCGA-AD-A5EK-01
TCGA-AM-5820-01
TCGA-AM-5821-01
TCGA-AU-3779-01
TCGA-AU-6004-01
TCGA-AY-4070-01
TCGA-AY-5543-01
TCGA-AY-6197-01
TCGA-AY-6386-01
TCGA-AY-A54L-01
TCGA-AY-A69D-01
TCGA-AY-A71X-01
TCGA-AY-A8YK-01
TCGA-AZ-4308-01
TCGA-AZ-4313-01
TCGA-AZ-4315-01
TCGA-AZ-4323-01
TCGA-AZ-4614-01
TCGA-AZ-4615-01
TCGA-AZ-4616-01
TCGA-AZ-4681-01
TCGA-AZ-4682-01
TCGA-AZ-4684-01
TCGA-AZ-5403-01
TCGA-AZ-5407-01
TCGA-AZ-6598-01
TCGA-AZ-6599-01
TCGA-AZ-6600-01
TCGA-AZ-6605-01
TCGA-AZ-6606-01
TCGA-AZ-6607-01
TCGA-CA-5254-01
TCGA-CA-5255-01
TCGA-CA-5256-01
TCGA-CA-5797-01
TCGA-CA-6715-01
TCGA-CA-6716-01
TCGA-CA-6718-01
TCGA-CA-6719-01
TCGA-CK-4947-01
TCGA-CK-4948-01
TCGA-CK-5912-01
TCGA-CK-5913-01
TCGA-CK-5914-01
TCGA-CK-5915-01
TCGA-CK-5916-01
TCGA-CK-6746-01
TCGA-CK-6747-01
TCGA-CM-4743-01
TCGA-CM-4744-01
TCGA-CM-4746-01
TCGA-CM-4747-01
TCGA-CM-4750-01
TCGA-CM-4751-01
TCGA-CM-4752-01
TCGA-CM-5341-01
TCGA-CM-5344-01
TCGA-CM-5348-01
TCGA-CM-5349-01
TCGA-CM-5860-01
TCGA-CM-5861-01
TCGA-CM-5862-01
TCGA-CM-5864-01
TCGA-CM-5868-01
TCGA-CM-6161-01
TCGA-CM-6163-01
TCGA-CM-6164-01
TCGA-CM-6165-01
TCGA-CM-6166-01
TCGA-CM-6167-01
TCGA-CM-6168-01
TCGA-CM-6169-01
TCGA-CM-6170-01
TCGA-CM-6171-01
TCGA-CM-6172-01
TCGA-CM-6674-01
TCGA-CM-6675-01
TCGA-CM-6676-01
TCGA-CM-6677-01
TCGA-CM-6678-01
TCGA-CM-6679-01
TCGA-CM-6680-01
TCGA-D5-5538-01
TCGA-D5-5540-01
TCGA-D5-5541-01
TCGA-D5-6529-01
TCGA-D5-6530-01
TCGA-D5-6531-01
TCGA-D5-6532-01
TCGA-D5-6535-01
TCGA-D5-6536-01
TCGA-D5-6537-01
TCGA-D5-6538-01
TCGA-D5-6541-01
TCGA-D5-6898-01
TCGA-D5-6920-01
TCGA-D5-6922-01
TCGA-D5-6923-01
TCGA-D5-6924-01
TCGA-D5-6926-01
TCGA-D5-6927-01
TCGA-D5-6929-01
TCGA-D5-6931-01
TCGA-D5-6932-01
TCGA-DM-A0X9-01
TCGA-DM-A0XD-01
TCGA-DM-A1D0-01
TCGA-DM-A1D4-01
TCGA-DM-A1D9-01
TCGA-DM-A1DA-01
TCGA-DM-A1DB-01
TCGA-DM-A1HA-01
TCGA-DM-A282-01
TCGA-DM-A28A-01
TCGA-DM-A28C-01
TCGA-DM-A28E-01
TCGA-DM-A28F-01
TCGA-DM-A28G-01
TCGA-DM-A28H-01
TCGA-DM-A28M-01
TCGA-F4-6459-01
TCGA-F4-6460-01
TCGA-F4-6461-01
TCGA-F4-6569-01
TCGA-F4-6570-01
TCGA-F4-6703-01
TCGA-F4-6805-01
TCGA-F4-6806-01
TCGA-F4-6807-01
TCGA-F4-6808-01
TCGA-F4-6809-01
TCGA-F4-6854-01
TCGA-F4-6855-01
TCGA-G4-6293-01
TCGA-G4-6294-01
TCGA-G4-6295-01
TCGA-G4-6297-01
TCGA-G4-6298-01
TCGA-G4-6299-01
TCGA-G4-6303-01
TCGA-G4-6304-01
TCGA-G4-6307-01
TCGA-G4-6309-01
TCGA-G4-6311-01
TCGA-G4-6315-01
TCGA-G4-6317-01
TCGA-G4-6320-01
TCGA-G4-6321-01
TCGA-G4-6323-01
TCGA-G4-6586-01
TCGA-G4-6588-01
TCGA-G4-6626-01
TCGA-G4-6627-01
TCGA-G4-6628-01
TCGA-NH-A50T-01
TCGA-NH-A50V-01
TCGA-NH-A5IV-01
TCGA-NH-A6GA-01
TCGA-NH-A6GB-01
TCGA-NH-A8F7-01
TCGA-NH-A8F8-01
TCGA-QG-A5YV-01
TCGA-QG-A5YX-01
TCGA-QG-A5Z1-01
TCGA-QG-A5Z2-01
TCGA-QL-A97D-01
TCGA-RU-A8FL-01
TCGA-SS-A7HO-01
TCGA-T9-A92H-01

## Sheet: Tumor-stroma ratio (TSR)
Supplementary Data 1
Histologic Tumor-Stroma Ratio (TSR) scores for n=333 coloncarcinoma patients from the TCGA Pan-Cancer Atlas
Patient_ID	Stromal_percentage	Stromal_content (≤50%=low,>50%=high)
TCGA-3L-AA1B-01	50	Low
TCGA-4N-A93T-01	40	Low
TCGA-5M-AAT4-01	80	High
TCGA-5M-AAT6-01	40	Low
TCGA-5M-AATE-01	80	High
TCGA-A6-2671-01	30	Low
TCGA-A6-2672-01	20	Low
TCGA-A6-2676-01	50	Low
TCGA-A6-2677-01	40	Low
TCGA-A6-2678-01	20	Low
TCGA-A6-2680-01	60	High
TCGA-A6-2681-01	50	Low
TCGA-A6-2682-01	60	High
TCGA-A6-2683-01	50	Low
TCGA-A6-2684-01	60	High
TCGA-A6-2685-01	50	Low
TCGA-A6-2686-01	70	High
TCGA-A6-3807-01	50	Low
TCGA-A6-3810-01	40	Low
TCGA-A6-4105-01	20	Low
TCGA-A6-4107-01	70	High
TCGA-A6-5656-01	50	Low
TCGA-A6-5657-01	40	Low
TCGA-A6-5659-01	40	Low
TCGA-A6-5660-01	20	Low
TCGA-A6-5661-01	40	Low
TCGA-A6-5662-01	20	Low
TCGA-A6-5664-01	20	Low
TCGA-A6-5665-01	30	Low
TCGA-A6-5666-01	20	Low
TCGA-A6-5667-01	60	High
TCGA-A6-6137-01	20	Low
TCGA-A6-6138-01	50	Low
TCGA-A6-6140-01	70	High
TCGA-A6-6141-01	80	High
TCGA-A6-6142-01	10	Low
TCGA-A6-6648-01	40	Low
TCGA-A6-6649-01	40	Low
TCGA-A6-6650-01	20	Low
TCGA-A6-6651-01	70	High
TCGA-A6-6653-01	70	High
TCGA-A6-6654-01	80	High
TCGA-A6-A567-01	70	High
TCGA-A6-A56B-01	40	Low
TCGA-A6-A5ZU-01	50	Low
TCGA-AA-3492-01	20	Low
TCGA-AA-3494-01	20	Low
TCGA-AA-3506-01	10	Low
TCGA-AA-3511-01	20	Low
TCGA-AA-3514-01	60	High
TCGA-AA-3518-01	20	Low
TCGA-AA-3519-01	30	Low
TCGA-AA-3520-01	10	Low
TCGA-AA-3522-01	50	Low
TCGA-AA-3524-01	40	Low
TCGA-AA-3525-01	40	Low
TCGA-AA-3526-01	30	Low
TCGA-AA-3527-01	70	High
TCGA-AA-3529-01	30	Low
TCGA-AA-3531-01	70	High
TCGA-AA-3532-01	30	Low
TCGA-AA-3534-01	20	Low
TCGA-AA-3538-01	70	High
TCGA-AA-3542-01	40	Low
TCGA-AA-3544-01	60	High
TCGA-AA-3548-01	40	Low
TCGA-AA-3549-01	50	Low
TCGA-AA-3552-01	40	Low
TCGA-AA-3553-01	20	Low
TCGA-AA-3560-01	30	Low
TCGA-AA-3561-01	30	Low
TCGA-AA-3655-01	30	Low
TCGA-AA-3660-01	30	Low
TCGA-AA-3664-01	20	Low
TCGA-AA-3666-01	60	High
TCGA-AA-3667-01	60	High
TCGA-AA-3673-01	70	High
TCGA-AA-3675-01	30	Low
TCGA-AA-3678-01	20	Low
TCGA-AA-3679-01	40	Low
TCGA-AA-3680-01	20	Low
TCGA-AA-3681-01	20	Low
TCGA-AA-3685-01	40	Low
TCGA-AA-3688-01	40	Low
TCGA-AA-3693-01	60	High
TCGA-AA-3695-01	30	Low
TCGA-AA-3696-01	20	Low
TCGA-AA-3710-01	30	Low
TCGA-AA-3715-01	40	Low
TCGA-AA-3811-01	30	Low
TCGA-AA-3812-01	40	Low
TCGA-AA-3814-01	60	High
TCGA-AA-3818-01	70	High
TCGA-AA-3819-01	40	Low
TCGA-AA-3831-01	60	High
TCGA-AA-3833-01	50	Low
TCGA-AA-3841-01	50	Low
TCGA-AA-3842-01	30	Low
TCGA-AA-3844-01	40	Low
TCGA-AA-3845-01	60	High
TCGA-AA-3846-01	20	Low
TCGA-AA-3848-01	40	Low
TCGA-AA-3850-01	30	Low
TCGA-AA-3851-01	50	Low
TCGA-AA-3855-01	60	High
TCGA-AA-3856-01	70	High
TCGA-AA-3858-01	30	Low
TCGA-AA-3864-01	20	Low
TCGA-AA-3866-01	40	Low
TCGA-AA-3867-01	70	High
TCGA-AA-3869-01	40	Low
TCGA-AA-3870-01	30	Low
TCGA-AA-3875-01	70	High
TCGA-AA-3930-01	40	Low
TCGA-AA-3939-01	60	High
TCGA-AA-3941-01	70	High
TCGA-AA-3952-01	30	Low
TCGA-AA-3955-01	60	High
TCGA-AA-3956-01	70	High
TCGA-AA-3968-01	60	High
TCGA-AA-3971-01	70	High
TCGA-AA-3973-01	70	High
TCGA-AA-3975-01	80	High
TCGA-AA-3976-01	60	High
TCGA-AA-3979-01	40	Low
TCGA-AA-3980-01	30	Low
TCGA-AA-3982-01	60	High
TCGA-AA-3984-01	60	High
TCGA-AA-3986-01	80	High
TCGA-AA-3989-01	20	Low
TCGA-AA-A004-01	80	High
TCGA-AA-A00A-01	20	Low
TCGA-AA-A00D-01	60	High
TCGA-AA-A00E-01	20	Low
TCGA-AA-A00F-01	20	Low
TCGA-AA-A00K-01	40	Low
TCGA-AA-A00L-01	10	Low
TCGA-AA-A00O-01	10	Low
TCGA-AA-A00Q-01	20	Low
TCGA-AA-A00R-01	20	Low
TCGA-AA-A00U-01	20	Low
TCGA-AA-A00W-01	10	Low
TCGA-AA-A00Z-01	10	Low
TCGA-AA-A010-01	60	High
TCGA-AA-A017-01	60	High
TCGA-AA-A01C-01	30	Low
TCGA-AA-A01F-01	10	Low
TCGA-AA-A01K-01	40	Low
TCGA-AA-A01P-01	70	High
TCGA-AA-A01Q-01	40	Low
TCGA-AA-A01S-01	30	Low
TCGA-AA-A01T-01	30	Low
TCGA-AA-A01V-01	40	Low
TCGA-AA-A01X-01	40	Low
TCGA-AA-A01Z-01	30	Low
TCGA-AA-A022-01	30	Low
TCGA-AA-A029-01	30	Low
TCGA-AA-A02E-01	40	Low
TCGA-AA-A02H-01	40	Low
TCGA-AA-A02J-01	40	Low
TCGA-AA-A02O-01	50	Low
TCGA-AA-A02R-01	50	Low
TCGA-AA-A02W-01	40	Low
TCGA-AA-A02Y-01	40	Low
TCGA-AA-A03J-01	40	Low
TCGA-AD-6548-01	30	Low
TCGA-AD-6888-01	40	Low
TCGA-AD-6889-01	30	Low
TCGA-AD-6895-01	40	Low
TCGA-AD-6965-01	20	Low
TCGA-AD-A5EJ-01	40	Low
TCGA-AD-A5EK-01	30	Low
TCGA-AM-5820-01	40	Low
TCGA-AM-5821-01	70	High
TCGA-AU-3779-01	70	High
TCGA-AU-6004-01	30	Low
TCGA-AY-4070-01	40	Low
TCGA-AY-5543-01	40	Low
TCGA-AY-6197-01	40	Low
TCGA-AY-6386-01	80	High
TCGA-AY-A54L-01	70	High
TCGA-AY-A69D-01	70	High
TCGA-AY-A71X-01	80	High
TCGA-AY-A8YK-01	50	Low
TCGA-AZ-4308-01	70	High
TCGA-AZ-4313-01	30	Low
TCGA-AZ-4315-01	40	Low
TCGA-AZ-4614-01	80	High
TCGA-AZ-4615-01	80	High
TCGA-AZ-4616-01	60	High
TCGA-AZ-4681-01	60	High
TCGA-AZ-4682-01	20	Low
TCGA-AZ-4684-01	60	High
TCGA-AZ-5403-01	80	High
TCGA-AZ-5407-01	20	Low
TCGA-AZ-6598-01	60	High
TCGA-AZ-6599-01	60	High
TCGA-AZ-6600-01	60	High
TCGA-AZ-6605-01	60	High
TCGA-AZ-6606-01	60	High
TCGA-AZ-6607-01	40	Low
TCGA-CA-5254-01	90	High
TCGA-CA-5255-01	80	High
TCGA-CA-5256-01	70	High
TCGA-CA-5797-01	30	Low
TCGA-CA-6715-01	80	High
TCGA-CA-6716-01	40	Low
TCGA-CA-6719-01	30	Low
TCGA-CK-4947-01	80	High
TCGA-CK-4948-01	70	High
TCGA-CK-5912-01	80	High
TCGA-CK-5913-01	20	Low
TCGA-CK-5914-01	40	Low
TCGA-CK-5915-01	80	High
TCGA-CK-5916-01	70	High
TCGA-CK-6746-01	40	Low
TCGA-CK-6747-01	60	High
TCGA-CM-4743-01	70	High
TCGA-CM-4744-01	40	Low
TCGA-CM-4746-01	30	Low
TCGA-CM-4747-01	70	High
TCGA-CM-4750-01	40	Low
TCGA-CM-4751-01	70	High
TCGA-CM-4752-01	70	High
TCGA-CM-5341-01	30	Low
TCGA-CM-5344-01	60	High
TCGA-CM-5348-01	90	High
TCGA-CM-5349-01	40	Low
TCGA-CM-5860-01	70	High
TCGA-CM-5861-01	70	High
TCGA-CM-5862-01	70	High
TCGA-CM-5864-01	50	Low
TCGA-CM-5868-01	70	High
TCGA-CM-6161-01	70	High
TCGA-CM-6163-01	30	Low
TCGA-CM-6164-01	50	Low
TCGA-CM-6165-01	70	High
TCGA-CM-6166-01	20	Low
TCGA-CM-6167-01	40	Low
TCGA-CM-6168-01	40	Low
TCGA-CM-6169-01	70	High
TCGA-CM-6170-01	20	Low
TCGA-CM-6171-01	20	Low
TCGA-CM-6172-01	40	Low
TCGA-CM-6674-01	50	Low
TCGA-CM-6675-01	70	High
TCGA-CM-6676-01	50	Low
TCGA-CM-6677-01	70	High
TCGA-CM-6678-01	10	Low
TCGA-CM-6679-01	60	High
TCGA-CM-6680-01	40	Low
TCGA-D5-5538-01	90	High
TCGA-D5-5540-01	40	Low
TCGA-D5-5541-01	40	Low
TCGA-D5-6529-01	60	High
TCGA-D5-6530-01	30	Low
TCGA-D5-6531-01	30	Low
TCGA-D5-6532-01	30	Low
TCGA-D5-6535-01	90	High
TCGA-D5-6536-01	40	Low
TCGA-D5-6537-01	50	Low
TCGA-D5-6538-01	40	Low
TCGA-D5-6541-01	60	High
TCGA-D5-6898-01	70	High
TCGA-D5-6920-01	30	Low
TCGA-D5-6922-01	20	Low
TCGA-D5-6923-01	40	Low
TCGA-D5-6924-01	50	Low
TCGA-D5-6927-01	50	Low
TCGA-D5-6929-01	70	High
TCGA-D5-6931-01	30	Low
TCGA-D5-6932-01	40	Low
TCGA-DM-A0X9-01	70	High
TCGA-DM-A0XD-01	40	Low
TCGA-DM-A1D0-01	70	High
TCGA-DM-A1D4-01	70	High
TCGA-DM-A1D9-01	50	Low
TCGA-DM-A1DA-01	80	High
TCGA-DM-A1DB-01	60	High
TCGA-DM-A1HA-01	70	High
TCGA-DM-A282-01	30	Low
TCGA-DM-A28A-01	80	High
TCGA-DM-A28E-01	30	Low
TCGA-DM-A28F-01	30	Low
TCGA-DM-A28G-01	90	High
TCGA-DM-A28H-01	70	High
TCGA-DM-A28M-01	50	Low
TCGA-F4-6459-01	50	Low
TCGA-F4-6460-01	70	High
TCGA-F4-6461-01	80	High
TCGA-F4-6569-01	50	Low
TCGA-F4-6570-01	30	Low
TCGA-F4-6703-01	70	High
TCGA-F4-6805-01	30	Low
TCGA-F4-6806-01	40	Low
TCGA-F4-6807-01	70	High
TCGA-F4-6808-01	40	Low
TCGA-F4-6809-01	90	High
TCGA-F4-6854-01	70	High
TCGA-F4-6855-01	70	High
TCGA-G4-6293-01	50	Low
TCGA-G4-6294-01	50	Low
TCGA-G4-6295-01	70	High
TCGA-G4-6297-01	30	Low
TCGA-G4-6299-01	70	High
TCGA-G4-6303-01	30	Low
TCGA-G4-6304-01	80	High
TCGA-G4-6307-01	40	Low
TCGA-G4-6309-01	30	Low
TCGA-G4-6311-01	70	High
TCGA-G4-6315-01	40	Low
TCGA-G4-6317-01	70	High
TCGA-G4-6320-01	70	High
TCGA-G4-6321-01	20	Low
TCGA-G4-6323-01	30	Low
TCGA-G4-6586-01	30	Low
TCGA-G4-6588-01	70	High
TCGA-G4-6626-01	20	Low
TCGA-G4-6627-01	70	High
TCGA-G4-6628-01	40	Low
TCGA-NH-A50T-01	60	High
TCGA-NH-A50V-01	60	High
TCGA-NH-A5IV-01	80	High
TCGA-NH-A6GA-01	40	Low
TCGA-NH-A6GB-01	60	High
TCGA-NH-A8F7-01	50	Low
TCGA-NH-A8F8-01	70	High
TCGA-QG-A5YV-01	90	High
TCGA-QG-A5YX-01	50	Low
TCGA-QG-A5Z1-01	80	High
TCGA-QG-A5Z2-01	30	Low
TCGA-QL-A97D-01	70	High
TCGA-SS-A7HO-01	70	High

## Sheet: Gene_sets
Supplementary Data 1
Gene sets for enrichment analysis as used in this study
HALLMARK_ANGIOGENESIS	HALLMARK_COAGULATION	HALLMARK_COMPLEMENT	HALLMARK_EPITHELIAL_MESENCHYMAL_TRANSITION	HALLMARK_TGF_BETA_SIGNALING	HALLMARK_WNT_BETA_CATENIN_SIGNALING	STROMAL_LIQUIG_BIOPSY_PANEL_GENES	STROMAL_SIG	EPITHELIAL_SIG	GOBP_PLATELET_DEGRANULATION	HALLMARK_G2M_CHECKPOINT
> Genes up-regulated during formation of blood vessels (angiogenesis).	> Genes encoding components of blood coagulation system; also up-regulated in platelets.	> Genes encoding components of the complement system, which is part of the innate immune system.	> Genes defining epithelial-mesenchymal transition, as in wound healing, fibrosis and metastasis.	> Genes up-regulated in response to TGFB1 [GeneID=7040].	> Genes up-regulated by activation of WNT signaling through accumulation of beta catenin CTNNB1 [GeneID=1499].	> Corresponding genes of the protein constituents of the Stromal Liquid Biopsy panel	> Stromal Liquid Biopsy genes comprising the stromal signature	> Stromal Liquid Biopsy genes comprising the epithelial signature	> The regulated exocytosis of secretory granules containing preformed mediators such as histamine and serotonin by a platelet. [GOC:add]	> Genes involved in the G2/M checkpoint, as in progression through the cell division cycle.
APOH	A2M	ACTN2	ABI3BP	ACVR1	ADAM17	C3	C3	C4BPA	A1BG	ABL1
APP	ACOX2	ADAM9	ACTA2	APC	AXIN1	C4BPA	CFP	CFB	A2M	AMD1
CCND2	ADAM9	ADRA2B	ADAM12	ARID4B	AXIN2	CFB	ECM1	CHGA	ABCC4	ARID4A
COL3A1	ANG	AKAP10	ANPEP	BCAR3	CCND2	CFP	THBS1	PF4	ACTN1	ATF5
COL5A2	ANXA1	ANG	APLP1	BMP2	CSNK1E	CHGA	TIMP1	PPBP	ACTN2	ATRX
CXCL6	APOA1	ANXA5	AREG	BMPR1A	CTNNB1	ECM1		SAA2	ACTN4	AURKA
FGFR1	APOC1	APOA4	BASP1	BMPR2	CUL1	PF4		SERPINA1	AHSG	AURKB
FSTL1	APOC2	APOBEC3F	BDNF	CDH1	DKK1	PPBP		SERPIND1	ALB	BARD1
ITGAV	APOC3	APOBEC3G	BGN	CDK9	DKK4	SAA2			ALDOA	BCL3
JAG1	ARF4	APOC1	BMP1	CDKN1C	DLL1	SERPINA1			ANXA5	BIRC5
JAG2	BMP1	ATOX1	CADM1	CTNNB1	DVL2	SERPIND1			APLP2	BRCA2
KCNJ8	C1QA	BRPF3	CALD1	ENG	FRAT1	THBS1			APOA1	BUB1
LPL	C1R	C1QA	CALU	FKBP1A	FZD1	TIMP1			APOH	BUB3
LRPAP1	C1S	C1QC	CAP2	FNTA	FZD8				APOOL	CASP8AP2
LUM	C2	C1R	CAPG	FURIN	GNAI1				APP	CBX1
MSX1	C3	C1S	CCN1	HDAC1	HDAC11				BLK	CCNA2
NRP1	C8A	C2	CCN2	HIPK2	HDAC2				BRPF3	CCNB2
OLR1	C8B	C3	CD44	ID1	HDAC5				CALM1	CCND1
PDGFA	C8G	C4BPB	CD59	ID2	HEY1				CD109	CCNF
PF4	C9	C9	CDH11	ID3	HEY2				CD36	CCNT1
PGLYRP1	CAPN2	CA2	CDH2	IFNGR2	JAG1				CD63	CDC20
POSTN	CAPN5	CALM1	CDH6	JUNB	JAG2				CD9	CDC25A
PRG2	CASP9	CALM3	COL11A1	KLF10	KAT2A				CDC37L1	CDC25B
PTK2	CD9	CASP1	COL12A1	LEFTY2	LEF1				CFD	CDC27
S100A4	CFB	CASP10	COL16A1	LTBP2	MAML1				CHID1	CDC45
SERPINA5	CFD	CASP3	COL1A1	MAP3K7	MYC				CLEC3B	CDC6
SLCO2A1	CFH	CASP4	COL1A2	NCOR2	NCOR2				CLU	CDC7
SPP1	CFI	CASP5	COL3A1	NOG	NCSTN				CTSW	CDK1
STC1	CLU	CASP7	COL4A1	PMEPA1	NKD1				CYB5R1	CDK4
THBD	COMP	CASP9	COL4A2	PPM1A	NOTCH1				CYRIB	CDKN1B
TIMP1	CPB2	CBLB	COL5A1	PPP1CA	NOTCH4				DMTN	CDKN2C
TNFRSF21	CPN1	CCL5	COL5A2	PPP1R15A	NUMB				ECM1	CDKN3
VAV2	CPQ	CD36	COL5A3	RAB31	PPARD				EGF	CENPA
VCAN	CRIP2	CD40LG	COL6A2	RHOA	PSEN2				ENDOD1	CENPE
VEGFA	CSRP1	CD46	COL6A3	SERPINE1	PTCH1				F13A1	CENPF
VTN	CTSB	CD55	COL7A1	SKI	RBPJ				F5	CHAF1A
	CTSE	CD59	COL8A2	SKIL	SKP2				F8	CHEK1
	CTSH	CDA	COLGALT1	SLC20A1	TCF7				FAM3C	CHMP1A
	CTSK	CDH13	COMP	SMAD1	TP53				FERMT3	CKS1B
	CTSO	CDK5R1	COPA	SMAD3	WNT1				FGA	CKS2
	CTSV	CEBPB	CRLF1	SMAD6	WNT5B				FGB	CTCF
	DCT	CFB	CTHRC1	SMAD7	WNT6				FGG	CUL1
	DPP4	CFH	CXCL1	SMURF1					FLNA	CUL3
	DUSP14	CLU	CXCL12	SMURF2					FN1	CUL4A
	DUSP6	COL4A2	CXCL6	SPTBN1					GAS6	CUL5
	F10	CP	CXCL8	TGFB1					GTPBP2	DBF4
	F11	CPM	DAB2	TGFBR1					HABP4	DDX39A
	F12	CPQ	DCN	TGIF1					HGF	DKC1
	F13B	CR1	DKK1	THBS1					HRG	DMD
	F2	CR2	DPYSL3	TJP1					IGF1	DR1
	F2RL2	CSRP1	DST	TRIM33					IGF2	DTYMK
	F3	CTSB	ECM1	UBE2D3					ISLR	E2F1
	F8	CTSC	ECM2	WWTR1					ITGA2B	E2F2
	F9	CTSD	EDIL3	XIAP					ITGB3	E2F3
	FBN1	CTSH	EFEMP2						ITIH3	E2F4
	FGA	CTSL	ELN						ITIH4	EFNA5
	FGG	CTSO	EMP3						KNG1	EGF
	FN1	CTSS	ENO2						LAMP2	ESPL1
	FURIN	CTSV	FAP						LEFTY2	EWSR1
	FYN	CXCL1	FAS						LGALS3BP	EXO1
	GDA	DGKG	FBLN1						LHFPL2	EZH2
	GNB2	DGKH	FBLN2						LY6G6F	FANCC
	GNG12	DOCK10	FBLN5						LYN	FBXO5
	GP1BA	DOCK4	FBN1						MAGED2	FOXN3
	GP9	DOCK9	FBN2						MANF	G3BP1
	GSN	DPP4	FERMT2						MMRN1	GINS2
	HMGCS2	DUSP5	FGF2						NHLRC2	GSPT1
	HNF4A	DUSP6	FLNA						OLA1	H2AX
	HPN	DYRK2	FMOD						ORM1	H2AZ1
	HRG	EHD1	FN1						ORM2	H2AZ2
	HTRA1	ERAP2	FOXC2						P2RX1	H2BC12
	ISCU	F10	FSTL1						PCDH7	HIF1A
	ITGA2	F2	FSTL3						PCYOX1L	HIRA
	ITGB3	F3	FUCA1						PDGFA	HMGA1
	ITIH1	F5	FZD8						PDGFB	HMGB3
	KLF7	F7	GADD45A						PECAM1	HMGN2
	KLK8	F8	GADD45B						PF4	HMMR
	KLKB1	FCER1G	GAS1						PHACTR2	HNRNPD
	LAMP2	FCN1	GEM						PLEK	HNRNPU
	LEFTY2	FDX1	GJA1						PLG	HOXC10
	LGMN	FN1	GLIPR1						POTEKP	HSPA8
	LRP1	FYN	GPC1						PPBP	HUS1
	LTA4H	GATA3	GPX7						PROS1	ILF3
	MAFF	GCA	GREM1						PSAP	INCENP
	MASP2	GMFB	HTRA1						QSOX1	JPT1
	MBL2	GNAI2	ID2						RAB27B	KATNA1
	MEP1A	GNAI3	IGFBP2						RARRES2	KIF11
	MMP1	GNB2	IGFBP3						SCCPDH	KIF15
	MMP10	GNB4	IGFBP4						SCG3	KIF20B
	MMP11	GNG2	IL15						SELENOP	KIF22
	MMP14	GNGT2	IL32						SELP	KIF23
	MMP15	GP1BA	IL6						SERPINA1	KIF2C
	MMP2	GP9	INHBA						SERPINA3	KIF4A
	MMP3	GPD2	ITGA2						SERPINA4	KIF5B
	MMP7	GRB2	ITGA5						SERPINE1	KMT5A
	MMP8	GZMA	ITGAV						SERPINF2	KNL1
	MMP9	GZMB	ITGB1						SERPING1	KPNA2
	MSRB2	GZMK	ITGB3						SOD1	KPNB1
	MST1	HNF4A	ITGB5						SPARC	LBR
	OLR1	HPCAL4	JUN						SPP2	LIG3
	P2RY1	HSPA1A	LAMA1						SRGN	LMNB1
	PDGFB	HSPA5	LAMA2						STXBP1	MAD2L1
	PECAM1	IL6	LAMA3						STXBP2	MAP3K20
	PEF1	IRF1	LAMC1						SYK	MAPK14
	PF4	IRF2	LAMC2						SYTL4	MARCKS
	PLAT	IRF7	LGALS1						TAGLN2	MCM2
	PLAU	ITGAM	LOX						TEX264	MCM3
	PLEK	ITIH1	LOXL1						TF	MCM5
	PLG	JAK2	LOXL2						TGFB1	MCM6
	PREP	KCNIP2	LRP1						TGFB2	MEIS1
	PROC	KCNIP3	LRRC15						TGFB3	MEIS2
	PROS1	KIF2A	LUM						THBS1	MKI67
	PROZ	KLK1	MAGEE1						TIMP1	MNAT1
	PRSS23	KLKB1	MATN2						TIMP3	MT2A
	RABIF	KYNU	MATN3						TLN1	MTF2
	RAC1	L3MBTL4	MCM7						TMSB4X	MYBL2
	RAPGEF3	LAMP2	MEST						TMX3	MYC
	RGN	LAP3	MFAP5						TOR4A	NASP
	S100A1	LCK	MGP						TTN	NCL
	S100A13	LCP2	MMP1						TUBA4A	NDC80
	SERPINA1	LGALS3	MMP14						VCL	NEK2
	SERPINB2	LGMN	MMP2						VEGFA	NOLC1
	SERPINC1	LIPA	MMP3						VEGFB	NOTCH2
	SERPINE1	LRP1	MSX1						VEGFC	NSD2
	SERPING1	LTA4H	MXRA5						VEGFD	NUMA1
	SH2B2	LTF	MYL9						VTI1B	NUP50
	SIRT2	LYN	MYLK						VWF	NUP98
	SPARC	MAFF	NID2						WDR1	NUSAP1
	TF	ME1	NNMT							ODC1
	TFPI2	MMP12	NOTCH2							ODF2
	THBD	MMP13	NT5E							ORC5
	THBS1	MMP14	NTM							ORC6
	TIMP1	MMP15	OXTR							PAFAH1B1
	TIMP3	MMP8	P3H1							PBK
	TMPRSS6	MSRB1	PCOLCE							PDS5B
	USP11	MT3	PCOLCE2							PLK1
	VWF	NOTCH4	PDGFRB							PLK4
	WDR1	OLR1	PDLIM4							PML
		PCLO	PFN2							POLA2
		PCSK9	PLAUR							POLE
		PDGFB	PLOD1							POLQ
		PDP1	PLOD2							PRC1
		PFN1	PLOD3							PRIM2
		PHEX	PMEPA1							PRMT5
		PIK3CA	PMP22							PRPF4B
		PIK3CG	POSTN							PTTG1
		PIK3R5	PPIB							PTTG3P
		PIM1	PRRX1							PURA
		PLA2G4A	PRSS2							RACGAP1
		PLA2G7	PTHLH							RAD21
		PLAT	PTX3							RAD23B
		PLAUR	PVR							RAD54L
		PLEK	QSOX1							RASAL2
		PLG	RGS4							RBL1
		PLSCR1	RHOB							RBM14
		PPP2CB	SAT1							RPA2
		PPP4C	SCG2							RPS6KA5
		PRCP	SDC1							SAP30
		PRDM4	SDC4							SFPQ
		PREP	SERPINE1							SLC12A2
		PRKCD	SERPINE2							SLC38A1
		PRSS3	SERPINH1							SLC7A1
		PRSS36	SFRP1							SLC7A5
		PSEN1	SFRP4							SMAD3
		PSMB9	SGCB							SMARCC1
		RABIF	SGCD							SMC1A
		RAF1	SGCG							SMC2
		RASGRP1	SLC6A8							SMC4
		RBSN	SLIT2							SNRPD1
		RCE1	SLIT3							SQLE
		RHOG	SNAI2							SRSF1
		RNF4	SNTB1							SRSF10
		S100A12	SPARC							SRSF2
		S100A13	SPOCK1							SS18
		S100A9	SPP1							STAG1
		SCG3	TAGLN							STIL
		SERPINA1	TFPI2							STMN1
		SERPINB2	TGFB1							SUV39H1
		SERPINC1	TGFBI							SYNCRIP
		SERPINE1	TGFBR3							TACC3
		SERPING1	TGM2							TENT4A
		SH2B3	THBS1							TFDP1
		SIRT6	THBS2							TGFB1
		SPOCK2	THY1							TLE3
		SRC	TIMP1							TMPO
		STX4	TIMP3							TNPO2
		TFPI2	TNC							TOP1
		TIMP1	TNFAIP3							TOP2A
		TIMP2	TNFRSF11B							TPX2
		TMPRSS6	TNFRSF12A							TRA2B
		TNFAIP3	TPM1							TRAIP
		USP14	TPM2							TROAP
		USP15	TPM4							TTK
		USP16	VCAM1							UBE2C
		USP8	VCAN							UBE2S
		VCPIP1	VEGFA							UCK2
		WAS	VEGFC							UPF1
		XPNPEP1	VIM							WRN
		ZEB1	WIPF1							XPO1
		ZFPM2	WNT5A							YTHDC1

## Sheet: Gene_set_enrichment_scores
Supplementary Data 1
Gene set enrichment scores for 333 coloncarcinoma tumors from the TCGA Pan-Cancer Atlas that were histologically scored for the tumor-stroma ratio
Patient_ID	Angiogenesis	Coagulation	Complement	EMT	TGFB	Wnt	SLB_signature	Epithelial_signature	Stromal_signature	Platelet_degranulation	Cell_cycle_checkpoint
TCGA-3L-AA1B-01	0.54242	0.418362	0.419595	0.635864	0.803593	0.706505	0.591072	0.141212	0.593142	0.767003	0.888602
TCGA-4N-A93T-01	0.288115	0.264103	0.350354	0.361985	0.651387	0.499335	0.261076	-0.0540351	0.415971	0.623224	0.769487
TCGA-5M-AAT4-01	0.466236	0.288351	0.349242	0.518864	0.724231	0.556517	0.370672	0.0471799	0.435809	0.647432	1.07706
TCGA-5M-AAT6-01	0.675609	0.475741	0.558166	0.780569	0.789263	0.511011	0.376079	-0.016258	0.513642	0.83956	1.05812
TCGA-5M-AATE-01	0.516708	0.340769	0.377451	0.550218	0.7404	0.612498	0.262094	-0.0912571	0.463483	0.635839	1.05846
TCGA-A6-2671-01	0.279278	0.257457	0.117211	0.353836	0.413158	0.237164	-0.0566993	-0.303668	0.292292	0.32578	0.516562
TCGA-A6-2672-01	0.267136	0.288096	0.242683	0.319229	0.417243	0.114213	0.0503359	-0.183539	0.283446	0.277858	0.547583
TCGA-A6-2676-01	0.251806	0.241832	0.22189	0.222705	0.35371	0.0756286	-0.102198	-0.280115	0.222147	0.302199	0.660357
TCGA-A6-2677-01	0.123939	0.114778	0.0435546	0.0857959	0.360694	0.159998	-0.232248	-0.351016	0.145281	0.145971	0.580802
TCGA-A6-2678-01	0.241605	0.228887	0.131109	0.225569	0.387578	0.0961936	-0.0544251	-0.223851	0.228264	0.235698	0.536543
TCGA-A6-2680-01	0.19283	0.257527	0.151214	0.257138	0.393003	0.247994	0.0921789	-0.0930188	0.256969	0.204062	0.467741
TCGA-A6-2681-01	0.280538	0.325893	0.160024	0.37438	0.412278	0.236801	0.111578	-0.140457	0.334348	0.31891	0.416814
TCGA-A6-2682-01	0.663189	0.520518	0.522364	0.794651	0.794629	0.55777	0.647891	0.231275	0.551981	0.799983	0.941378
TCGA-A6-2683-01	0.0907834	0.182315	0.0453896	0.136838	0.312384	0.304626	0.00314144	-0.205928	0.265249	0.185381	0.313427
TCGA-A6-2684-01	0.637497	0.485434	0.498391	0.755716	0.784355	0.565691	0.492252	0.025766	0.61481	0.803722	1.02813
TCGA-A6-2685-01	0.709839	0.547381	0.543107	0.818641	0.840448	0.569966	0.648228	0.217689	0.572484	0.934302	0.821882
TCGA-A6-2686-01	0.580557	0.481202	0.56005	0.672965	0.731596	0.421106	0.223016	-0.188896	0.516319	0.797711	0.940609
TCGA-A6-3807-01	0.28444	0.255372	0.157481	0.322038	0.419994	0.155692	0.204632	0.0457008	0.210094	0.324113	0.465053
TCGA-A6-3810-01	0.340256	0.308829	0.192389	0.417582	0.438843	0.155747	0.056691	-0.209504	0.337197	0.347744	0.451333
TCGA-A6-4105-01	0.626868	0.472634	0.51825	0.740643	0.819859	0.574713	0.482704	0.0828287	0.533922	0.768956	1.10628
TCGA-A6-4107-01	0.225454	0.303014	0.163013	0.318809	0.409892	0.182738	0.201802	-0.0647911	0.342587	0.255506	0.423749
TCGA-A6-5656-01	0.448537	0.358025	0.401032	0.511816	0.721934	0.545539	0.302162	-0.0231514	0.426292	0.670444	0.942799
TCGA-A6-5657-01	0.646794	0.470772	0.480741	0.804933	0.87915	0.573825	0.493446	0.0755937	0.557565	0.865111	1.06133
TCGA-A6-5659-01	0.549426	0.393108	0.414578	0.648703	0.812979	0.58067	0.282184	-0.105728	0.510922	0.699713	1.06132
TCGA-A6-5660-01	0.604604	0.408572	0.438309	0.667035	0.777947	0.575875	0.428067	0.102789	0.437849	0.733194	0.97487
TCGA-A6-5661-01	0.553804	0.402104	0.494842	0.597297	0.782689	0.445092	0.508602	0.146509	0.484672	0.67607	1.08525
TCGA-A6-5662-01	0.573304	0.390025	0.415669	0.621652	0.785421	0.634394	0.310735	0.020457	0.389472	0.742072	0.867079
TCGA-A6-5664-01	0.662574	0.552517	0.55637	0.798151	0.86793	0.640538	0.672173	0.202125	0.620692	0.974928	1.02904
TCGA-A6-5665-01	0.441471	0.353097	0.476062	0.466005	0.685169	0.44444	0.256584	-0.0142065	0.368129	0.61103	1.1143
TCGA-A6-5666-01	0.486678	0.294237	0.366676	0.471345	0.713056	0.50738	0.130515	-0.109181	0.319631	0.64359	1.06666
TCGA-A6-5667-01	0.526742	0.415441	0.426869	0.676934	0.778877	0.557769	0.263068	-0.112845	0.492064	0.719826	1.06073
TCGA-A6-6137-01	0.501086	0.403594	0.471178	0.566907	0.829959	0.587727	0.427532	0.0616296	0.488386	0.702212	0.9334
TCGA-A6-6138-01	0.650241	0.493816	0.570265	0.709737	0.818722	0.572586	0.411854	0.00998059	0.532256	0.809347	0.999836
TCGA-A6-6140-01	0.453434	0.335048	0.420913	0.479855	0.776359	0.579085	0.360823	0.12749	0.313148	0.625378	1.07792
TCGA-A6-6141-01	0.505495	0.42168	0.468744	0.600393	0.788848	0.581009	0.418804	0.0166066	0.529879	0.73117	0.970642
TCGA-A6-6142-01	0.727714	0.543029	0.510605	0.875253	0.849973	0.676368	0.432421	-0.0367518	0.603399	0.836806	0.865877
TCGA-A6-6648-01	0.471586	0.309059	0.419132	0.490949	0.784164	0.526295	0.2296	0.0461932	0.250883	0.630816	1.17836
TCGA-A6-6649-01	0.556451	0.463004	0.501857	0.694864	0.855849	0.519543	0.574246	0.110142	0.611558	0.841281	0.993527
TCGA-A6-6650-01	0.406059	0.307408	0.402775	0.484508	0.734736	0.526851	0.209526	-0.0121076	0.297767	0.600093	1.10882
TCGA-A6-6651-01	0.722094	0.547888	0.545792	0.877262	0.86302	0.611723	0.390128	-0.0516109	0.574436	0.986261	0.979778
TCGA-A6-6653-01	0.603897	0.454894	0.508902	0.647568	0.772127	0.51475	0.348408	0.00716104	0.451218	0.74665	1.12515
TCGA-A6-6654-01	0.725278	0.522314	0.572528	0.8867	0.865615	0.606885	0.494914	0.0117707	0.629763	0.928522	0.97305
TCGA-A6-A567-01	0.537064	0.412182	0.417346	0.640616	0.790882	0.600806	0.360489	0.0342383	0.432242	0.73099	0.93659
TCGA-A6-A56B-01	0.55862	0.358788	0.369966	0.67989	0.779844	0.633975	0.183784	-0.156331	0.434883	0.650331	1.04546
TCGA-A6-A5ZU-01	0.625646	0.452007	0.499976	0.743421	0.841843	0.641424	0.441374	0.0242191	0.543934	0.825151	0.82947
TCGA-AA-3492-01	0.549016	0.41825	0.478588	0.569779	0.700855	0.491481	0.299101	0.0142816	0.376761	0.658629	1.07204
TCGA-AA-3494-01	0.166724	0.222185	0.100733	0.174119	0.385613	0.219327	-0.0168543	-0.110611	0.138909	0.156747	0.476505
TCGA-AA-3506-01	0.540147	0.471144	0.498382	0.65257	0.767325	0.592749	0.587763	0.20704	0.505406	0.775178	0.995794
TCGA-AA-3511-01	0.610514	0.478311	0.478508	0.731286	0.774669	0.574873	0.651373	0.247695	0.534446	0.780855	0.949901
TCGA-AA-3514-01	0.24071	0.304093	0.100797	0.325596	0.377128	0.335324	0.0872224	-0.166978	0.320034	0.268553	0.376038
TCGA-AA-3518-01	0.168167	0.234942	0.170733	0.17436	0.337343	0.131583	-0.00831694	-0.15905	0.204605	0.226475	0.564618
TCGA-AA-3519-01	0.154301	0.219619	0.134552	0.196832	0.356654	0.187939	0.0548953	-0.0372674	0.124092	0.214056	0.584842
TCGA-AA-3520-01	0.254256	0.276598	0.146447	0.32204	0.417938	0.154477	0.0760493	-0.148268	0.281689	0.283135	0.548375
TCGA-AA-3522-01	0.145574	0.219568	0.13628	0.116811	0.371795	0.0880457	0.187288	0.0655394	0.163298	0.192521	0.41575
TCGA-AA-3524-01	0.18714	0.20324	0.119183	0.205444	0.331391	0.0765396	-0.0283434	-0.0859868	0.0887218	0.190594	0.572941
TCGA-AA-3525-01	0.16194	0.234764	0.153243	0.184294	0.339441	0.0916698	-0.0088303	-0.0626065	0.0749174	0.259142	0.515587
TCGA-AA-3526-01	0.527351	0.412523	0.481599	0.628315	0.726598	0.466469	0.384359	0.0700242	0.422027	0.656895	1.06416
TCGA-AA-3527-01	0.208238	0.299728	0.13155	0.309821	0.35262	0.330963	0.0955979	-0.150963	0.319547	0.255508	0.338928
TCGA-AA-3529-01	0.169089	0.223347	0.107665	0.221519	0.419922	0.159008	0.0207951	-0.0598498	0.116405	0.185687	0.513515
TCGA-AA-3531-01	0.0611096	0.165194	0.0525226	0.124831	0.32537	0.264977	-0.0866287	-0.238237	0.189108	0.178083	0.510023
TCGA-AA-3532-01	0.212502	0.271129	0.181458	0.308438	0.390362	0.0957762	0.0247764	-0.153117	0.238187	0.234314	0.547771
TCGA-AA-3534-01	0.206658	0.249744	0.10096	0.258215	0.460243	0.267853	-0.0208209	-0.13979	0.168074	0.207996	0.573716
TCGA-AA-3538-01	0.255325	0.236811	0.114042	0.298684	0.428638	0.184093	-0.00740237	-0.178088	0.23976	0.222261	0.512888
TCGA-AA-3542-01	0.0795184	0.231204	0.0652699	0.127487	0.257275	0.138865	-0.184997	-0.248936	0.0992787	0.154038	0.446354
TCGA-AA-3544-01	0.244137	0.297762	0.192248	0.253984	0.359787	0.217128	0.0678207	-0.13972	0.270507	0.280561	0.492011
TCGA-AA-3548-01	0.182567	0.258632	0.13524	0.245015	0.342763	0.167042	0.00285002	-0.180834	0.244847	0.196494	0.471854
TCGA-AA-3549-01	0.256605	0.263893	0.163555	0.272348	0.385238	0.185031	0.0719711	-0.110961	0.249378	0.251392	0.47818
TCGA-AA-3552-01	0.207369	0.227355	0.146963	0.184919	0.401036	0.20296	0.0234784	-0.142198	0.222834	0.263781	0.429371
TCGA-AA-3553-01	0.198426	0.269789	0.157671	0.278996	0.396011	0.109401	0.22394	0.0593081	0.223555	0.269292	0.519611
TCGA-AA-3560-01	0.195184	0.286492	0.163842	0.226628	0.299563	0.0805096	0.152424	-0.0688684	0.294496	0.236863	0.489608
TCGA-AA-3561-01	0.153935	0.154218	0.0980375	0.116639	0.315175	0.0613499	-0.0393391	-0.122376	0.121846	0.139426	0.554774
TCGA-AA-3655-01	0.567754	0.436557	0.474004	0.649956	0.737001	0.508358	0.380519	0.0265138	0.475942	0.716659	1.07996
TCGA-AA-3660-01	0.563153	0.415977	0.427619	0.600458	0.764998	0.63584	0.363222	0.0857548	0.371471	0.664342	1.09424
TCGA-AA-3664-01	0.166164	0.170123	0.110301	0.12871	0.364606	0.117193	0.0203252	-0.0820241	0.147137	0.13887	0.607921
TCGA-AA-3666-01	0.181277	0.23145	0.148244	0.168959	0.382857	0.132114	0.067204	-0.096432	0.224974	0.197661	0.586599
TCGA-AA-3667-01	0.119348	0.217069	0.084295	0.193971	0.348479	0.263064	-0.00938068	-0.189024	0.236055	0.167228	0.377237
TCGA-AA-3673-01	0.168299	0.240188	0.109162	0.235895	0.412207	0.208332	-0.00595039	-0.170303	0.21717	0.221446	0.517372
TCGA-AA-3675-01	0.524415	0.381665	0.426288	0.605365	0.723958	0.55667	0.552776	0.154593	0.530925	0.676195	1.00494
TCGA-AA-3678-01	0.130371	0.235797	0.149138	0.195906	0.410223	0.175947	0.193614	0.0387059	0.210553	0.19438	0.511256
TCGA-AA-3679-01	0.143262	0.236998	0.114232	0.232332	0.374137	0.179402	-0.0454418	-0.139455	0.139724	0.216501	0.492785
TCGA-AA-3680-01	0.0944354	0.211961	0.109083	0.143112	0.457372	0.189124	0.108	-0.078719	0.24208	0.178625	0.344428
TCGA-AA-3681-01	0.219273	0.233697	0.171685	0.20954	0.421661	0.18091	0.132517	-0.0539315	0.255087	0.209767	0.552405
TCGA-AA-3685-01	0.508395	0.433015	0.508329	0.608889	0.700813	0.47472	0.507206	0.170622	0.448503	0.707289	1.02219
TCGA-AA-3688-01	0.15843	0.200503	0.0801139	0.166346	0.343702	0.188092	-0.0449702	-0.145257	0.146405	0.197487	0.56377
TCGA-AA-3693-01	0.115128	0.15005	0.0671428	0.128244	0.386705	0.15975	-0.264587	-0.308204	0.0717774	0.178807	0.46944
TCGA-AA-3695-01	0.0684006	0.201558	0.0862028	0.376908	0.448334	0.0969244	-0.128034	-0.362157	0.279042	0.301187	0.570819
TCGA-AA-3696-01	0.19182	0.187846	0.0449913	0.243823	0.382557	0.193194	-0.0986982	-0.164829	0.0928528	0.223042	0.484828
TCGA-AA-3710-01	0.204842	0.283787	0.256874	0.247378	0.397189	0.00958996	0.104046	-0.04094	0.198048	0.252686	0.536019
TCGA-AA-3715-01	0.293659	0.330594	0.242622	0.43801	0.465307	0.157668	0.0884481	-0.21664	0.370919	0.368902	0.42546
TCGA-AA-3811-01	0.262248	0.212921	0.153529	0.224393	0.381849	0.171418	-0.0109495	-0.149604	0.17352	0.277567	0.600716
TCGA-AA-3812-01	0.278998	0.327362	0.168781	0.386645	0.406629	0.288792	0.211101	-0.0758814	0.366484	0.310694	0.22021
TCGA-AA-3814-01	0.261172	0.29758	0.17983	0.377436	0.438743	0.145341	0.128866	-0.112923	0.322161	0.298151	0.449439
TCGA-AA-3818-01	0.177979	0.197988	0.115115	0.197983	0.40517	0.144028	0.00844574	-0.240092	0.309371	0.188052	0.476064
TCGA-AA-3819-01	0.105587	0.190532	0.0818511	0.195636	0.378359	0.149564	-0.0141441	-0.134391	0.159146	0.165851	0.522546
TCGA-AA-3831-01	0.205563	0.250806	0.132312	0.206316	0.392447	0.168245	0.0524587	-0.12686	0.239277	0.257891	0.533749
TCGA-AA-3833-01	0.291019	0.340041	0.206952	0.377825	0.477219	0.138607	0.0724704	-0.168178	0.319055	0.358262	0.44852
TCGA-AA-3841-01	0.190042	0.289167	0.143586	0.275905	0.375031	0.25705	0.159105	-0.0743623	0.318054	0.26942	0.392008
TCGA-AA-3842-01	0.258461	0.265966	0.154329	0.290372	0.344264	0.108805	-0.0508404	-0.155131	0.142546	0.240114	0.582912
TCGA-AA-3844-01	0.153905	0.193159	0.13376	0.149997	0.3676	0.160532	0.130906	0.000518713	0.175794	0.175641	0.589552
TCGA-AA-3845-01	0.25859	0.249049	0.203262	0.291728	0.507044	0.060326	0.0433066	-0.102096	0.192529	0.342614	0.556904
TCGA-AA-3846-01	0.178746	0.207435	0.157565	0.200694	0.40834	0.131571	0.0681439	-0.0700709	0.185939	0.191318	0.485852
TCGA-AA-3848-01	0.0938497	0.197233	0.0629319	0.158976	0.332842	0.28553	0.0223504	-0.166005	0.251399	0.144536	0.451397
TCGA-AA-3850-01	0.246365	0.300629	0.187974	0.277245	0.411298	0.184322	0.184364	0.0134431	0.233643	0.289426	0.470952
TCGA-AA-3851-01	0.223292	0.272784	0.168212	0.242261	0.404269	0.100822	0.129455	-0.0777246	0.279774	0.227867	0.503844
TCGA-AA-3855-01	0.158943	0.254835	0.155898	0.209634	0.404043	0.183121	0.0585708	-0.0546664	0.156586	0.203077	0.52742
TCGA-AA-3856-01	0.163649	0.228128	0.157246	0.176154	0.381492	0.20847	-0.0207998	-0.19506	0.234949	0.204328	0.483541
TCGA-AA-3858-01	0.211824	0.2235	0.0864874	0.253484	0.361965	0.177136	-0.0744825	-0.225403	0.20697	0.195441	0.559748
TCGA-AA-3864-01	0.162743	0.219132	0.122431	0.247432	0.366819	0.0882095	-0.0621947	-0.209049	0.189039	0.217222	0.652588
TCGA-AA-3866-01	0.298878	0.290753	0.203385	0.343938	0.404692	0.137282	0.042812	-0.194661	0.298473	0.295401	0.582727
TCGA-AA-3867-01	0.28055	0.271705	0.119618	0.374303	0.452534	0.213696	-0.0428952	-0.260702	0.277051	0.326258	0.438242
TCGA-AA-3869-01	0.26104	0.259962	0.177477	0.244086	0.417691	0.19376	0.143641	-0.0130318	0.218608	0.205104	0.520325
TCGA-AA-3870-01	0.306419	0.366581	0.205562	0.40958	0.482881	0.178825	0.104391	-0.174372	0.365581	0.43434	0.460764
TCGA-AA-3875-01	0.147094	0.229098	0.125724	0.220962	0.408482	0.111838	-0.0400389	-0.211556	0.228715	0.18217	0.563344
TCGA-AA-3930-01	0.24203	0.228896	0.162435	0.223258	0.364693	0.0485653	-0.0660133	-0.198421	0.169755	0.201058	0.595361
TCGA-AA-3939-01	0.195869	0.26844	0.161948	0.270715	0.426328	0.0842463	0.124898	-0.0660621	0.261479	0.21221	0.459995
TCGA-AA-3941-01	0.157278	0.206937	0.101876	0.134864	0.381985	0.14853	-0.0140092	-0.14253	0.181452	0.170428	0.548791
TCGA-AA-3952-01	0.281278	0.252939	0.109858	0.30586	0.35578	0.111438	-0.026305	-0.217462	0.232555	0.287745	0.51273
TCGA-AA-3955-01	0.121883	0.202599	0.107641	0.136592	0.369063	0.115772	-0.0613437	-0.129576	0.105589	0.164877	0.612308
TCGA-AA-3956-01	0.229288	0.248743	0.136428	0.277456	0.416757	0.165835	0.0967615	-0.0790929	0.240495	0.272091	0.439437
TCGA-AA-3968-01	0.223635	0.240653	0.140431	0.294753	0.407723	0.227215	0.00658394	-0.160286	0.226122	0.178365	0.594708
TCGA-AA-3971-01	0.148521	0.24845	0.151193	0.199248	0.377947	0.150193	0.0977419	-0.0837345	0.229485	0.23586	0.4463
TCGA-AA-3973-01	0.227506	0.214074	0.0967562	0.230826	0.356026	0.266443	-0.116256	-0.291087	0.210004	0.234696	0.351552
TCGA-AA-3975-01	0.202332	0.258382	0.124113	0.232051	0.407445	0.247477	0.0687501	-0.107907	0.241566	0.264672	0.417141
TCGA-AA-3976-01	0.180293	0.2198	0.109319	0.24592	0.401018	0.180588	0.110444	-0.0110843	0.17036	0.227856	0.53611
TCGA-AA-3979-01	0.109185	0.134625	0.0918641	0.100299	0.299371	0.100086	-0.155763	-0.15967	0.0189121	0.0677559	0.588211
TCGA-AA-3980-01	0.205862	0.168716	0.139843	0.160651	0.350683	0.148128	-0.0624011	-0.158892	0.142911	0.160977	0.602199
TCGA-AA-3982-01	0.2362	0.236438	0.155306	0.222749	0.383439	0.151347	-0.050552	-0.259109	0.245935	0.232491	0.5271
TCGA-AA-3984-01	0.238843	0.254282	0.158966	0.279266	0.43698	0.14492	0.0195527	-0.148783	0.219057	0.208863	0.678409
TCGA-AA-3986-01	0.165607	0.267843	0.190072	0.202627	0.435069	0.203407	0.150657	-0.0329927	0.250248	0.240536	0.477929
TCGA-AA-3989-01	0.270687	0.262258	0.138776	0.274073	0.374306	0.225014	0.105877	-0.0827924	0.253448	0.27152	0.417479
TCGA-AA-A004-01	0.173149	0.283454	0.120324	0.242023	0.334128	0.268387	0.196981	0.0167452	0.245796	0.330816	0.306713
TCGA-AA-A00A-01	0.281679	0.280282	0.169511	0.277451	0.353362	0.156678	0.100831	-0.138425	0.310525	0.254541	0.488849
TCGA-AA-A00D-01	0.214864	0.263252	0.21286	0.248812	0.401776	0.192299	0.109547	-0.0526159	0.212785	0.282208	0.543818
TCGA-AA-A00E-01	0.158787	0.266142	0.19294	0.20601	0.370495	0.0778036	-0.026711	-0.183	0.200402	0.298538	0.586868
TCGA-AA-A00F-01	0.269905	0.287771	0.134709	0.346437	0.43961	0.205633	0.0905661	-0.110086	0.277752	0.259586	0.528474
TCGA-AA-A00K-01	0.211003	0.261804	0.129865	0.220125	0.351829	0.195759	0.0637246	-0.0776742	0.188547	0.201161	0.55918
TCGA-AA-A00L-01	0.102303	0.157123	0.0538381	0.123018	0.349416	0.187507	-0.00810651	-0.0828143	0.109731	0.163484	0.527025
TCGA-AA-A00O-01	0.350228	0.288921	0.0992173	0.302773	0.453215	0.275733	-0.0319108	-0.213449	0.22612	0.352898	0.290835
TCGA-AA-A00Q-01	0.185456	0.205378	0.0760358	0.213361	0.370058	0.209872	-0.0734176	-0.292595	0.280671	0.177591	0.455859
TCGA-AA-A00R-01	0.206997	0.223968	0.215592	0.194107	0.338517	0.0960196	0.0202886	-0.135851	0.183172	0.257767	0.671072
TCGA-AA-A00U-01	0.180781	0.19226	0.0969998	0.169114	0.387335	0.212168	-0.0209279	-0.122032	0.1475	0.161782	0.611103
TCGA-AA-A00W-01	0.0417866	0.136037	0.0661417	-0.0022392	0.381605	0.199645	0.0436581	-0.0521026	0.130767	0.0881655	0.504942
TCGA-AA-A00Z-01	0.150731	0.188722	0.0736144	0.170396	0.363615	0.164136	-0.00706489	-0.127829	0.172237	0.162133	0.624391
TCGA-AA-A010-01	0.224629	0.17494	0.109349	0.146376	0.348163	0.235725	-0.0168342	-0.171945	0.21676	0.18813	0.639618
TCGA-AA-A017-01	0.215024	0.244577	0.0777945	0.271406	0.358583	0.237648	0.0254757	-0.172553	0.253118	0.25303	0.379202
TCGA-AA-A01C-01	0.271619	0.254555	0.0901552	0.312101	0.378685	0.223424	0.025981	-0.191773	0.267809	0.246638	0.53062
TCGA-AA-A01F-01	0.0240769	0.135309	0.0642117	0.0192685	0.360175	0.218348	-0.0158642	-0.047468	0.0478348	0.128322	0.469083
TCGA-AA-A01K-01	0.268888	0.267587	0.134979	0.36588	0.428989	0.186687	0.158085	-0.0523125	0.286014	0.270121	0.468933
TCGA-AA-A01P-01	0.61495	0.503729	0.584987	0.742784	0.817194	0.479487	0.531109	0.111932	0.542178	0.878264	1.05676
TCGA-AA-A01Q-01	0.0246538	0.123105	0.0872588	0.00989989	0.277637	0.140539	-0.111268	-0.237671	0.162065	0.102284	0.528563
TCGA-AA-A01S-01	-0.013306	0.0817803	-1.3518e-05	0.0282687	0.316965	0.258521	-0.197544	-0.233469	0.0653815	0.111697	0.509414
TCGA-AA-A01T-01	0.0596631	0.204922	0.0631374	0.135103	0.317002	0.232658	-0.112463	-0.205842	0.136998	0.133938	0.42173
TCGA-AA-A01V-01	0.0652433	0.184135	0.083185	0.044424	0.354314	0.318154	0.111882	-0.00796501	0.162346	0.132881	0.430306
TCGA-AA-A01X-01	0.485956	0.389539	0.384244	0.556685	0.769815	0.640035	0.523591	0.130863	0.525726	0.74322	0.848233
TCGA-AA-A01Z-01	0.482069	0.316607	0.370545	0.493117	0.721047	0.503583	0.21776	0.00610016	0.287029	0.623101	1.05396
TCGA-AA-A022-01	0.259019	0.280583	0.218339	0.266125	0.409112	0.124974	-0.0706966	-0.212625	0.183696	0.301445	0.355567
TCGA-AA-A029-01	0.0854439	0.197208	0.0937458	0.0914641	0.355843	0.204273	-0.0780205	-0.129435	0.0823502	0.109845	0.492266
TCGA-AA-A02E-01	0.152965	0.191045	0.102521	0.171136	0.401372	0.301231	0.0104229	-0.128123	0.19891	0.145544	0.457163
TCGA-AA-A02H-01	0.223014	0.208885	0.0948385	0.242564	0.427993	0.218921	-0.0331277	-0.181039	0.189366	0.210377	0.432818
TCGA-AA-A02J-01	0.0357601	0.132363	0.0225103	0.0588098	0.362099	0.1894	-0.16196	-0.159357	0.0128367	0.133247	0.611687
TCGA-AA-A02O-01	0.0885166	0.244683	0.089953	0.174427	0.313679	0.19863	0.0480355	-0.104509	0.210673	0.191601	0.47407
TCGA-AA-A02R-01	0.254187	0.24611	0.210274	0.247178	0.404226	0.173094	-0.0884154	-0.288308	0.238582	0.31228	0.601294
TCGA-AA-A02W-01	0.155339	0.179127	0.0749244	0.185795	0.409171	0.198278	-0.171	-0.316606	0.192072	0.148024	0.501284
TCGA-AA-A02Y-01	0.262819	0.287603	0.431	0.27152	0.705717	0.507878	0.530072	0.194362	0.444123	0.56557	0.961284
TCGA-AA-A03J-01	0.161122	0.255463	0.118376	0.246481	0.368289	0.271466	0.045094	-0.155265	0.263029	0.194869	0.419084
TCGA-AD-6548-01	0.624328	0.478759	0.537207	0.722642	0.792249	0.526509	0.48918	0.107416	0.509346	0.748548	1.13793
TCGA-AD-6888-01	0.337813	0.351667	0.400815	0.377992	0.709004	0.538096	0.496536	0.23529	0.341696	0.573372	0.959885
TCGA-AD-6889-01	0.544577	0.410289	0.463935	0.572127	0.737021	0.486546	0.268296	0.0129352	0.346264	0.675024	1.04577
TCGA-AD-6895-01	0.619295	0.469874	0.535194	0.708761	0.815896	0.518922	0.448856	0.0327776	0.547458	0.826224	1.0523
TCGA-AD-6965-01	0.543105	0.374571	0.413491	0.588853	0.768214	0.604069	0.397811	0.0745643	0.431937	0.622756	1.16594
TCGA-AD-A5EJ-01	0.560556	0.454994	0.480135	0.638619	0.742526	0.493735	0.521759	0.164436	0.476793	0.744375	1.11606
TCGA-AD-A5EK-01	0.516424	0.374547	0.389734	0.558089	0.742692	0.573108	0.218973	-0.00448598	0.298161	0.661841	1.04963
TCGA-AM-5820-01	0.617531	0.377464	0.426591	0.631505	0.767391	0.510754	0.200079	-0.0979791	0.402961	0.742276	0.98426
TCGA-AM-5821-01	0.608596	0.482481	0.569805	0.728682	0.815377	0.45147	0.491651	0.089345	0.534482	0.825765	1.14377
TCGA-AU-3779-01	0.609705	0.466138	0.500089	0.699494	0.776254	0.550893	0.470142	0.0782997	0.51484	0.743487	0.930417
TCGA-AU-6004-01	0.651551	0.495762	0.56412	0.704568	0.768542	0.477833	0.460246	0.0541446	0.535008	0.776772	1.05507
TCGA-AY-4070-01	0.267932	0.281534	0.166654	0.268842	0.466088	0.150882	-0.00373989	-0.177175	0.237079	0.252987	0.433611
TCGA-AY-5543-01	0.46006	0.364999	0.476677	0.488751	0.737537	0.483769	0.47766	0.181947	0.392586	0.606059	1.02223
TCGA-AY-6197-01	0.533061	0.406964	0.495509	0.539743	0.749375	0.550139	0.419169	0.138821	0.372862	0.666972	1.05305
TCGA-AY-6386-01	0.542362	0.410849	0.488707	0.539666	0.757965	0.548639	0.527672	0.147066	0.504631	0.667159	1.04271
TCGA-AY-A54L-01	0.344444	0.342665	0.393967	0.397752	0.766556	0.541033	0.362492	0.106824	0.343652	0.616941	1.05555
TCGA-AY-A69D-01	0.474588	0.350023	0.405041	0.574767	0.792906	0.605795	0.369706	0.0588741	0.409158	0.656166	1.13885
TCGA-AY-A71X-01	0.306402	0.316328	0.356503	0.333681	0.743633	0.568739	0.415867	0.104766	0.416982	0.623315	0.911542
TCGA-AY-A8YK-01	0.513018	0.397679	0.419261	0.527801	0.7321	0.55362	0.436478	0.166371	0.359516	0.704516	0.998312
TCGA-AZ-4308-01	0.229571	0.313115	0.112313	0.363979	0.338489	0.225887	0.144076	-0.109366	0.324058	0.30814	0.335765
TCGA-AZ-4313-01	0.388858	0.345496	0.409105	0.542937	0.65031	0.431388	0.243761	0.016784	0.301322	0.627037	1.10848
TCGA-AZ-4315-01	0.563759	0.369212	0.464133	0.612047	0.689605	0.438998	0.480552	0.116613	0.486416	0.677425	1.0857
TCGA-AZ-4614-01	0.396747	0.346111	0.402566	0.449621	0.726854	0.491195	0.21794	0.00520211	0.292213	0.605854	1.07928
TCGA-AZ-4615-01	0.597499	0.442662	0.556435	0.696821	0.761026	0.469743	0.349397	-0.0727683	0.530921	0.76386	1.01574
TCGA-AZ-4616-01	0.610389	0.43759	0.499761	0.664286	0.736987	0.531864	0.491069	0.133551	0.478337	0.715808	1.01361
TCGA-AZ-4681-01	0.0223304	0.170467	0.0419587	0.0451429	0.257077	0.192446	-0.0483148	-0.097036	0.0713927	0.0945178	0.50739
TCGA-AZ-4682-01	0.458266	0.414858	0.440969	0.553956	0.748922	0.508386	0.415158	0.110436	0.409463	0.684251	0.999096
TCGA-AZ-4684-01	0.647564	0.498829	0.530087	0.725895	0.776615	0.519744	0.533882	0.154506	0.504612	0.825453	1.017
TCGA-AZ-5403-01	0.617132	0.487745	0.475081	0.753405	0.762598	0.453451	0.31017	-0.0484087	0.476139	0.786504	0.963589
TCGA-AZ-5407-01	0.373257	0.372799	0.424298	0.422601	0.744456	0.497648	0.344914	0.0873933	0.346307	0.629665	1.00056
TCGA-AZ-6598-01	0.510789	0.396011	0.485099	0.601972	0.709878	0.466404	0.218582	-0.0986129	0.411674	0.700195	1.08963
TCGA-AZ-6599-01	0.247437	0.290589	0.36525	0.307532	0.743501	0.559594	0.254234	-0.01994	0.365482	0.571816	0.941107
TCGA-AZ-6600-01	0.689379	0.5006	0.519679	0.748345	0.799321	0.552491	0.494889	0.0847996	0.546502	0.843268	1.01577
TCGA-AZ-6605-01	0.686649	0.518222	0.545089	0.854196	0.836447	0.591087	0.593946	0.159993	0.575178	0.845183	0.95629
TCGA-AZ-6606-01	0.432097	0.342149	0.451935	0.437732	0.75645	0.575737	0.445416	0.123877	0.431574	0.611928	1.09431
TCGA-AZ-6607-01	0.730972	0.548689	0.596847	0.963365	0.966036	0.517369	0.494287	0.0596296	0.579352	0.996103	0.824443
TCGA-CA-5254-01	0.543241	0.422459	0.444238	0.652995	0.786029	0.462467	0.408339	0.0328223	0.491048	0.701015	0.964537
TCGA-CA-5255-01	0.445744	0.363135	0.427135	0.473263	0.694975	0.480807	0.39427	0.100636	0.396999	0.699263	0.920648
TCGA-CA-5256-01	0.458146	0.381903	0.416144	0.524256	0.683057	0.4714	0.3161	0.0247091	0.395271	0.644213	0.991509
TCGA-CA-5797-01	0.572774	0.434298	0.441817	0.645889	0.766175	0.569818	0.32139	0.00224761	0.43019	0.716812	1.05081
TCGA-CA-6715-01	0.496446	0.335762	0.374654	0.552375	0.719479	0.576932	0.206442	0.0273942	0.245688	0.649353	1.0827
TCGA-CA-6716-01	0.535927	0.391028	0.379438	0.667341	0.785566	0.615452	0.320775	-0.0232136	0.456764	0.713011	0.885336
TCGA-CA-6719-01	0.676276	0.450453	0.477677	0.759548	0.818245	0.614458	0.345998	-0.0362074	0.506213	0.805105	0.982683
TCGA-CK-4947-01	0.560832	0.44286	0.507634	0.650075	0.754368	0.544587	0.470274	0.0954329	0.501796	0.735454	1.04305
TCGA-CK-4948-01	0.646178	0.486407	0.462617	0.74138	0.751562	0.608349	0.466317	0.0860144	0.504525	0.741399	1.06446
TCGA-CK-5912-01	0.533971	0.351855	0.392936	0.544092	0.734812	0.62818	0.262261	-0.067837	0.431742	0.652417	1.02931
TCGA-CK-5913-01	0.648945	0.470915	0.540337	0.704189	0.800229	0.48369	0.599647	0.273863	0.427022	0.741783	1.09061
TCGA-CK-5914-01	0.555017	0.35178	0.448055	0.603416	0.748784	0.538806	0.21276	-0.0630048	0.371827	0.642532	1.14607
TCGA-CK-5915-01	0.454418	0.318168	0.369356	0.468462	0.804739	0.595033	0.1861	-0.0541554	0.329507	0.629141	1.12764
TCGA-CK-5916-01	0.610269	0.429555	0.54022	0.677379	0.789622	0.469692	0.310949	-0.0802212	0.502909	0.779722	1.12968
TCGA-CK-6746-01	0.459376	0.33102	0.523271	0.476731	0.671322	0.472221	0.0651219	-0.140764	0.270066	0.710391	1.12764
TCGA-CK-6747-01	0.519478	0.403259	0.463952	0.593327	0.770127	0.594139	0.500401	0.145573	0.472148	0.652304	1.06082
TCGA-CM-4743-01	0.575727	0.399014	0.501648	0.567329	0.766071	0.397293	0.408286	0.115282	0.390114	0.691194	0.995409
TCGA-CM-4744-01	0.448951	0.373336	0.462505	0.444087	0.683724	0.51847	0.32531	0.0405642	0.385629	0.601889	1.05993
TCGA-CM-4746-01	0.0303828	0.194177	0.1105	0.102854	0.314991	0.117309	-0.0157926	-0.106471	0.128734	0.162553	0.494533
TCGA-CM-4747-01	0.541545	0.413762	0.428177	0.654754	0.788466	0.599399	0.456686	0.0259988	0.571443	0.72131	0.907395
TCGA-CM-4750-01	0.152412	0.218415	0.096846	0.242907	0.342596	0.172168	0.168757	-0.049203	0.296707	0.205677	0.524536
TCGA-CM-4751-01	0.575575	0.494016	0.527816	0.688348	0.826719	0.543607	0.439508	0.0459389	0.522357	0.763663	1.02427
TCGA-CM-4752-01	0.203419	0.257271	0.160011	0.254789	0.327336	0.145539	0.161846	-0.0086193	0.228013	0.241591	0.454636
TCGA-CM-5341-01	0.213169	0.307958	0.190839	0.314738	0.306171	-0.0339641	0.0203821	-0.19482	0.275837	0.32021	0.349245
TCGA-CM-5344-01	0.622065	0.430194	0.427114	0.777747	0.787126	0.51126	0.298251	-0.0692252	0.491753	0.697294	0.981878
TCGA-CM-5348-01	0.713659	0.534038	0.557046	0.821481	0.875513	0.520903	0.442609	0.0270099	0.545765	0.880981	0.859641
TCGA-CM-5349-01	0.643535	0.475207	0.492914	0.736119	0.771403	0.573337	0.432098	0.0288531	0.53495	0.788498	1.02244
TCGA-CM-5860-01	0.646556	0.502194	0.522179	0.826775	0.823204	0.509374	0.491162	0.0967612	0.527285	0.798801	1.027
TCGA-CM-5861-01	0.54869	0.432167	0.495245	0.588213	0.735525	0.473189	0.564805	0.169211	0.528675	0.82107	0.978923
TCGA-CM-5862-01	0.58443	0.391124	0.418462	0.621712	0.737934	0.607284	0.242172	-0.0780701	0.429926	0.700542	0.935764
TCGA-CM-5864-01	0.484182	0.387622	0.440727	0.512752	0.740459	0.586451	0.428322	0.149103	0.372142	0.680527	1.03868
TCGA-CM-5868-01	0.60023	0.41804	0.416166	0.683303	0.691179	0.514672	0.307636	-0.0469207	0.476222	0.740711	1.05988
TCGA-CM-6161-01	0.52568	0.41115	0.453837	0.61665	0.821974	0.611965	0.307841	-0.0325049	0.455447	0.685051	1.04337
TCGA-CM-6163-01	0.523994	0.414739	0.46351	0.654276	0.757114	0.556133	0.414096	0.0329985	0.508563	0.732267	1.02347
TCGA-CM-6164-01	0.549033	0.411541	0.434636	0.629005	0.77711	0.596072	0.335503	-0.0156883	0.47074	0.748257	1.0027
TCGA-CM-6165-01	0.628671	0.458157	0.483163	0.709704	0.782993	0.581862	0.399328	-0.00485661	0.527523	0.775378	0.958474
TCGA-CM-6166-01	0.525701	0.35622	0.367661	0.619513	0.788789	0.58577	0.173204	-0.183167	0.461574	0.656964	1.08321
TCGA-CM-6167-01	0.716718	0.474371	0.48551	0.851059	0.867779	0.59701	0.390532	-0.0351205	0.558295	0.976316	0.855137
TCGA-CM-6168-01	0.686132	0.515851	0.543068	0.859445	0.842803	0.585002	0.463813	0.0499667	0.551921	0.866172	1.01594
TCGA-CM-6169-01	0.70126	0.495996	0.575819	0.788065	0.89423	0.604533	0.620059	0.199964	0.558264	0.883978	0.893745
TCGA-CM-6170-01	0.584705	0.428829	0.454047	0.692299	0.743745	0.532938	0.42428	0.01096	0.543914	0.77385	0.964118
TCGA-CM-6171-01	0.618248	0.432863	0.48841	0.590622	0.757243	0.533973	0.338596	0.0320666	0.404988	0.775939	1.09066
TCGA-CM-6172-01	0.575049	0.398302	0.43505	0.616878	0.77011	0.53766	0.462127	0.0741696	0.503826	0.724014	1.02295
TCGA-CM-6674-01	0.550558	0.471848	0.512009	0.688178	0.701296	0.460596	0.339818	-0.00891768	0.457813	0.762534	1.03581
TCGA-CM-6675-01	0.532018	0.413296	0.431462	0.619156	0.760137	0.494097	0.271115	-0.0410696	0.411516	0.713829	1.09236
TCGA-CM-6676-01	0.590571	0.415749	0.411674	0.669744	0.810576	0.626466	0.205888	-0.170365	0.478666	0.720986	0.977743
TCGA-CM-6677-01	0.586029	0.413796	0.453636	0.659972	0.698868	0.590228	0.393376	0.00556048	0.506558	0.731386	1.10911
TCGA-CM-6678-01	0.534566	0.442641	0.422722	0.638653	0.777974	0.602743	0.401147	0.0141531	0.51522	0.755883	0.933726
TCGA-CM-6679-01	0.628386	0.468559	0.454091	0.786644	0.827752	0.589302	0.321452	-0.112069	0.551186	0.797278	0.936268
TCGA-CM-6680-01	0.610462	0.468701	0.491547	0.712591	0.814358	0.619029	0.486794	0.0996966	0.516709	0.764168	0.919569
TCGA-D5-5538-01	0.661301	0.510637	0.550275	0.729445	0.755414	0.507397	0.575155	0.163338	0.541803	0.811464	0.978835
TCGA-D5-5540-01	0.48091	0.29361	0.387018	0.539195	0.688593	0.457823	0.0580087	-0.217191	0.358982	0.603521	1.14715
TCGA-D5-5541-01	0.605315	0.434505	0.472644	0.673475	0.779775	0.543935	0.272669	-0.0732403	0.45936	0.790488	1.0551
TCGA-D5-6529-01	0.642403	0.487962	0.531412	0.785204	0.826928	0.577673	0.563845	0.124693	0.581438	0.812036	0.973187
TCGA-D5-6530-01	0.481349	0.406694	0.501404	0.544792	0.734075	0.533918	0.379016	0.043208	0.445343	0.679383	0.989512
TCGA-D5-6531-01	0.594419	0.404197	0.487637	0.670971	0.756496	0.62157	0.445021	0.0195473	0.561365	0.720501	1.10429
TCGA-D5-6532-01	0.4948	0.317867	0.370177	0.490796	0.633037	0.559843	0.24707	0.00558355	0.325607	0.616233	1.07014
TCGA-D5-6535-01	0.588289	0.427059	0.492246	0.635704	0.823336	0.542206	0.490066	0.0723021	0.551213	0.73259	0.997456
TCGA-D5-6536-01	0.702902	0.48488	0.493233	0.742026	0.758544	0.615122	0.686537	0.232312	0.598749	0.886555	0.964931
TCGA-D5-6537-01	0.471804	0.351526	0.425604	0.513635	0.737361	0.506992	0.39055	0.121829	0.356643	0.612489	1.13707
TCGA-D5-6538-01	0.43634	0.295754	0.34055	0.469375	0.736247	0.636379	0.0386398	-0.0990732	0.19517	0.654627	1.0272
TCGA-D5-6541-01	0.678192	0.461596	0.518942	0.760989	0.790286	0.549918	0.677869	0.231064	0.59248	0.808659	0.853767
TCGA-D5-6898-01	0.636342	0.451384	0.471037	0.711077	0.792751	0.540193	0.295182	-0.0786542	0.49704	0.80193	1.02608
TCGA-D5-6920-01	0.583306	0.443726	0.516828	0.610586	0.790947	0.562076	0.551255	0.252395	0.390741	0.736191	1.03221
TCGA-D5-6922-01	0.624832	0.407277	0.432584	0.709572	0.80595	0.611191	0.227112	-0.142538	0.483226	0.738729	1.06217
TCGA-D5-6923-01	0.65327	0.475025	0.475083	0.822619	0.844514	0.577091	0.437932	0.0153706	0.558672	0.776111	1.0906
TCGA-D5-6924-01	0.619206	0.485877	0.481654	0.777167	0.823971	0.594406	0.369306	-0.0595192	0.54823	0.850654	1.05485
TCGA-D5-6927-01	0.554113	0.472907	0.53165	0.740269	0.740042	0.482727	0.41738	0.034278	0.510496	0.763363	1.08615
TCGA-D5-6929-01	0.622064	0.462105	0.446349	0.734235	0.734883	0.576219	0.41839	0.0299423	0.510135	0.777719	0.985597
TCGA-D5-6931-01	0.579613	0.452562	0.49837	0.691015	0.805339	0.583625	0.530714	0.14411	0.512692	0.737	1.10178
TCGA-D5-6932-01	0.621052	0.449249	0.452577	0.697753	0.747881	0.607271	0.368433	-0.00215329	0.494621	0.754551	0.981804
TCGA-DM-A0X9-01	0.464135	0.34451	0.41375	0.518924	0.702824	0.550943	0.384262	0.0780973	0.409814	0.642056	1.10529
TCGA-DM-A0XD-01	0.574755	0.435448	0.428753	0.645565	0.691471	0.491483	0.61886	0.232558	0.511197	0.731644	1.05835
TCGA-DM-A1D0-01	0.417911	0.267887	0.333315	0.374669	0.716091	0.573459	0.141623	-0.0491614	0.25728	0.533064	1.0662
TCGA-DM-A1D4-01	0.350745	0.257303	0.384367	0.367318	0.633136	0.540852	0.354271	0.143268	0.277919	0.519997	1.04196
TCGA-DM-A1D9-01	0.469846	0.359025	0.389088	0.536967	0.681296	0.581225	0.280427	-0.0708752	0.4581	0.628032	1.06059
TCGA-DM-A1DA-01	0.446665	0.24598	0.363177	0.424883	0.633356	0.571909	-0.0138582	-0.239651	0.293	0.541935	1.12546
TCGA-DM-A1DB-01	0.342396	0.270766	0.352131	0.357344	0.696256	0.51239	0.24779	-0.00760768	0.345815	0.613461	1.13615
TCGA-DM-A1HA-01	0.350519	0.252561	0.378908	0.399145	0.712178	0.618183	0.216801	-0.0132207	0.305884	0.653872	0.968418
TCGA-DM-A282-01	0.486583	0.384647	0.376958	0.588345	0.760238	0.567668	0.256317	-0.0493991	0.403961	0.656188	0.982047
TCGA-DM-A28A-01	0.579842	0.390905	0.400391	0.674504	0.757544	0.608326	0.323309	-0.0425826	0.480293	0.683863	1.07951
TCGA-DM-A28E-01	0.353109	0.255536	0.350167	0.349411	0.721892	0.558182	0.226295	-0.0096161	0.316183	0.537888	1.02904
TCGA-DM-A28F-01	0.443394	0.322322	0.3783	0.486611	0.732654	0.492427	0.220232	-0.0366331	0.354227	0.564497	1.0443
TCGA-DM-A28G-01	0.455581	0.354264	0.388325	0.519636	0.789195	0.61302	0.355042	-0.0456266	0.519275	0.665481	0.928267
TCGA-DM-A28H-01	0.479266	0.271307	0.330231	0.405895	0.593757	0.46938	0.0323711	-0.179258	0.288775	0.599542	1.20985
TCGA-DM-A28M-01	0.434514	0.298068	0.370514	0.398646	0.650255	0.549324	0.364139	0.0798412	0.377816	0.599959	1.02108
TCGA-F4-6459-01	0.721044	0.499802	0.491944	0.814516	0.841486	0.568885	0.432647	0.0709631	0.486363	0.863246	0.952532
TCGA-F4-6460-01	0.605984	0.422312	0.453861	0.697495	0.790699	0.666078	0.447691	0.0609686	0.509036	0.805329	0.950125
TCGA-F4-6461-01	0.622369	0.450596	0.475366	0.754788	0.842349	0.633117	0.423977	-0.034766	0.588023	0.839028	0.92039
TCGA-F4-6569-01	0.728146	0.534417	0.53761	0.898432	0.861216	0.635178	0.451082	-0.0133491	0.601175	0.949383	0.917348
TCGA-F4-6570-01	0.668053	0.512343	0.59718	0.769098	0.804889	0.501152	0.481268	-0.00693661	0.623569	0.843028	0.990547
TCGA-F4-6703-01	0.796932	0.593011	0.665248	0.949819	0.873984	0.571542	0.735413	0.254839	0.637843	1.06776	0.945639
TCGA-F4-6805-01	0.695908	0.520502	0.538172	0.839035	0.829915	0.583143	0.656857	0.232917	0.563004	0.836033	1.03937
TCGA-F4-6806-01	0.567725	0.479753	0.467074	0.663911	0.818407	0.583085	0.495627	0.075666	0.558689	0.844045	0.869874
TCGA-F4-6807-01	0.696477	0.518322	0.546867	0.850228	0.862129	0.607821	0.459251	0.0122928	0.579832	0.886173	0.995434
TCGA-F4-6808-01	0.479432	0.381823	0.400267	0.523322	0.72275	0.511545	0.424645	0.144849	0.375874	0.658353	1.01367
TCGA-F4-6809-01	0.688139	0.492392	0.500219	0.756235	0.817058	0.60077	0.429541	-0.0112305	0.58425	0.90041	0.910907
TCGA-F4-6854-01	0.575184	0.440827	0.457552	0.673577	0.753209	0.624474	0.431221	0.0823794	0.469348	0.746141	1.04334
TCGA-F4-6855-01	0.634599	0.49449	0.453602	0.85976	0.817856	0.59212	0.411367	-0.0253698	0.576073	0.866433	0.886366
TCGA-G4-6293-01	0.526063	0.460837	0.505368	0.590308	0.807508	0.640436	0.563011	0.204754	0.471261	0.749078	0.887633
TCGA-G4-6294-01	0.517989	0.399822	0.44416	0.52067	0.755651	0.591061	0.405267	0.0501601	0.46787	0.68615	1.00353
TCGA-G4-6295-01	0.395839	0.302106	0.457798	0.488134	0.736315	0.546909	0.256768	-0.0751339	0.441925	0.624112	1.14319
TCGA-G4-6297-01	0.709704	0.49304	0.510052	0.831283	0.848013	0.58484	0.522011	0.0680756	0.603841	0.829202	0.977154
TCGA-G4-6299-01	0.611675	0.468998	0.515966	0.721259	0.827919	0.500638	0.289291	-0.128697	0.526876	0.815733	1.03882
TCGA-G4-6303-01	0.587824	0.412212	0.441357	0.703675	0.809898	0.580735	0.347248	-0.0132374	0.473134	0.747205	0.976285
TCGA-G4-6304-01	0.406005	0.246797	0.381811	0.320578	0.610461	0.577165	0.123731	-0.0525168	0.243215	0.541072	0.980567
TCGA-G4-6307-01	0.394731	0.328367	0.352687	0.424673	0.71497	0.566128	0.23636	-0.0225446	0.351726	0.624173	0.993225
TCGA-G4-6309-01	0.52493	0.403245	0.442572	0.55011	0.66358	0.504237	0.384164	0.0731834	0.421766	0.658611	1.13063
TCGA-G4-6311-01	0.677361	0.461047	0.491936	0.766725	0.845335	0.545404	0.395995	-0.0242706	0.55042	0.766319	1.0555
TCGA-G4-6315-01	0.37824	0.32787	0.388188	0.445801	0.7337	0.580843	0.249096	0.079238	0.228973	0.655775	1.07558
TCGA-G4-6317-01	0.356982	0.296227	0.344723	0.402186	0.64757	0.53967	0.153402	-0.0175091	0.238749	0.601242	1.00736
TCGA-G4-6320-01	0.435336	0.353406	0.394722	0.463201	0.727181	0.546018	0.200432	-0.0696954	0.361117	0.654132	1.01367
TCGA-G4-6321-01	0.389747	0.413764	0.553612	0.448356	0.810846	0.42622	0.504903	0.105818	0.524707	0.702278	0.669715
TCGA-G4-6323-01	0.386085	0.37551	0.463165	0.42053	0.782087	0.580027	0.543259	0.150283	0.523345	0.675764	0.868542
TCGA-G4-6586-01	0.425468	0.349128	0.477627	0.382209	0.614263	0.443808	0.369066	0.106692	0.34962	0.600842	1.04687
TCGA-G4-6588-01	0.600119	0.403963	0.470428	0.620811	0.708075	0.50792	0.349373	0.0162504	0.438832	0.734849	1.16959
TCGA-G4-6626-01	0.385556	0.306268	0.382223	0.483124	0.685782	0.514071	0.281661	0.0628945	0.293186	0.584956	1.13549
TCGA-G4-6627-01	0.670652	0.51735	0.563933	0.784708	0.859842	0.535279	0.604893	0.163292	0.588511	0.881166	0.926831
TCGA-G4-6628-01	0.517509	0.438657	0.562183	0.586369	0.768754	0.445945	0.404083	0.0352963	0.490914	0.807514	1.11716
TCGA-NH-A50T-01	0.451006	0.27188	0.329792	0.481903	0.68239	0.561767	0.238273	-0.0070238	0.337495	0.560071	1.15748
TCGA-NH-A50V-01	0.629866	0.437745	0.467626	0.721148	0.788529	0.543287	0.389235	0.00103408	0.51721	0.716868	0.896644
TCGA-NH-A5IV-01	0.563101	0.342605	0.435502	0.553973	0.683075	0.540373	0.153998	-0.195084	0.439833	0.721071	1.04891
TCGA-NH-A6GA-01	0.520302	0.400509	0.446445	0.548759	0.794494	0.627026	0.575246	0.185558	0.514032	0.75142	1.01372
TCGA-NH-A6GB-01	0.499843	0.381061	0.46971	0.561081	0.743362	0.55193	0.693897	0.333661	0.466353	0.694536	1.07064
TCGA-NH-A8F7-01	0.374982	0.262481	0.34645	0.418355	0.730313	0.621463	0.197582	-0.0367183	0.313248	0.597743	0.989479
TCGA-NH-A8F8-01	0.590973	0.407386	0.426452	0.688044	0.779043	0.586356	0.44866	0.0140066	0.578602	0.739958	0.879869
TCGA-QG-A5YV-01	0.467995	0.339853	0.414612	0.502791	0.760813	0.60284	0.417488	0.0868291	0.442575	0.604729	1.12309
TCGA-QG-A5YX-01	0.31299	0.27467	0.387939	0.374672	0.694678	0.4491	0.284476	0.0626985	0.299868	0.554815	1.06787
TCGA-QG-A5Z1-01	0.627521	0.383121	0.39532	0.654893	0.82706	0.586605	0.313353	-0.0589629	0.498519	0.686559	0.961276
TCGA-QG-A5Z2-01	0.347049	0.331563	0.463979	0.381397	0.771995	0.509354	0.313534	0.00138803	0.413458	0.600099	1.02354
TCGA-QL-A97D-01	0.438941	0.346071	0.465744	0.450813	0.775031	0.546215	0.34808	0.038067	0.416834	0.617835	1.09008
TCGA-SS-A7HO-01	0.456208	0.31723	0.339821	0.438332	0.729374	0.664456	0.214433	0.0122129	0.272622	0.649455	1.09132

## Sheet: Consensus_Molecular_Subtypes
Supplementary Data 1
Consensus Molecular Subtypes (CMS) labels for n=333 coloncarcinoma patients from the TCGA Pan-Cancer Atlas
Patient_ID	CMS_label
TCGA-3L-AA1B-01	CMS3
TCGA-4N-A93T-01	CMS2
TCGA-5M-AAT4-01	CMS2
TCGA-5M-AAT6-01	CMS4
TCGA-5M-AATE-01	CMS2
TCGA-A6-2671-01	CMS4
TCGA-A6-2672-01	CMS1
TCGA-A6-2676-01	CMS1
TCGA-A6-2677-01	CMS2
TCGA-A6-2678-01	CMS2
TCGA-A6-2680-01	CMS2
TCGA-A6-2681-01	CMS4
TCGA-A6-2682-01	CMS4
TCGA-A6-2683-01	CMS3
TCGA-A6-2684-01	CMS4
TCGA-A6-2685-01	CMS4
TCGA-A6-2686-01	CMS1
TCGA-A6-3807-01	CMS4
TCGA-A6-3810-01	CMS4
TCGA-A6-4105-01	CMS4
TCGA-A6-4107-01	CMS4
TCGA-A6-5656-01	CMS2
TCGA-A6-5657-01	CMS4
TCGA-A6-5659-01	CMS2
TCGA-A6-5660-01	CMS2
TCGA-A6-5661-01	CMS1
TCGA-A6-5662-01	CMS2
TCGA-A6-5664-01	CMS4
TCGA-A6-5665-01	CMS1
TCGA-A6-5666-01	CMS2
TCGA-A6-5667-01	CMS2
TCGA-A6-6137-01	CMS2
TCGA-A6-6138-01	CMS4
TCGA-A6-6140-01	CMS2
TCGA-A6-6141-01	CMS3
TCGA-A6-6142-01	CMS4
TCGA-A6-6648-01	CMS2
TCGA-A6-6649-01	CMS3
TCGA-A6-6650-01	CMS2
TCGA-A6-6651-01	CMS4
TCGA-A6-6653-01	CMS1
TCGA-A6-6654-01	CMS4
TCGA-A6-A567-01	CMS4
TCGA-A6-A56B-01	CMS4
TCGA-A6-A5ZU-01	CMS4
TCGA-AA-3492-01	CMS1
TCGA-AA-3494-01	CMS2
TCGA-AA-3506-01	CMS3
TCGA-AA-3511-01	CMS4
TCGA-AA-3514-01	CMS4
TCGA-AA-3518-01	CMS1
TCGA-AA-3519-01	CMS2
TCGA-AA-3520-01	CMS4
TCGA-AA-3522-01	CMS3
TCGA-AA-3524-01	CMS2
TCGA-AA-3525-01	CMS3
TCGA-AA-3526-01	CMS4
TCGA-AA-3527-01	CMS4
TCGA-AA-3529-01	CMS3
TCGA-AA-3531-01	CMS2
TCGA-AA-3532-01	CMS4
TCGA-AA-3534-01	CMS2
TCGA-AA-3538-01	CMS2
TCGA-AA-3542-01	CMS2
TCGA-AA-3544-01	CMS4
TCGA-AA-3548-01	CMS4
TCGA-AA-3549-01	CMS4
TCGA-AA-3552-01	CMS2
TCGA-AA-3553-01	CMS2
TCGA-AA-3560-01	CMS3
TCGA-AA-3561-01	CMS2
TCGA-AA-3655-01	CMS4
TCGA-AA-3660-01	CMS2
TCGA-AA-3664-01	CMS3
TCGA-AA-3666-01	CMS1
TCGA-AA-3667-01	CMS2
TCGA-AA-3673-01	CMS3
TCGA-AA-3675-01	CMS2
TCGA-AA-3678-01	CMS2
TCGA-AA-3679-01	CMS2
TCGA-AA-3680-01	CMS3
TCGA-AA-3681-01	CMS3
TCGA-AA-3685-01	CMS2
TCGA-AA-3688-01	CMS2
TCGA-AA-3693-01	CMS2
TCGA-AA-3695-01	CMS4
TCGA-AA-3696-01	CMS4
TCGA-AA-3710-01	CMS1
TCGA-AA-3715-01	CMS4
TCGA-AA-3811-01	CMS1
TCGA-AA-3812-01	CMS3
TCGA-AA-3814-01	CMS4
TCGA-AA-3818-01	CMS3
TCGA-AA-3819-01	CMS3
TCGA-AA-3831-01	CMS2
TCGA-AA-3833-01	CMS4
TCGA-AA-3841-01	CMS4
TCGA-AA-3842-01	CMS4
TCGA-AA-3844-01	CMS2
TCGA-AA-3845-01	CMS1
TCGA-AA-3846-01	CMS2
TCGA-AA-3848-01	CMS2
TCGA-AA-3850-01	CMS3
TCGA-AA-3851-01	CMS3
TCGA-AA-3855-01	CMS3
TCGA-AA-3856-01	CMS2
TCGA-AA-3858-01	CMS2
TCGA-AA-3864-01	CMS1
TCGA-AA-3866-01	CMS4
TCGA-AA-3867-01	CMS4
TCGA-AA-3869-01	CMS3
TCGA-AA-3870-01	CMS4
TCGA-AA-3875-01	CMS2
TCGA-AA-3930-01	CMS1
TCGA-AA-3939-01	CMS2
TCGA-AA-3941-01	CMS3
TCGA-AA-3952-01	CMS4
TCGA-AA-3955-01	CMS2
TCGA-AA-3956-01	CMS3
TCGA-AA-3968-01	CMS4
TCGA-AA-3971-01	CMS3
TCGA-AA-3973-01	CMS2
TCGA-AA-3975-01	CMS2
TCGA-AA-3976-01	CMS2
TCGA-AA-3979-01	CMS2
TCGA-AA-3980-01	CMS3
TCGA-AA-3982-01	CMS2
TCGA-AA-3984-01	CMS4
TCGA-AA-3986-01	CMS3
TCGA-AA-3989-01	CMS2
TCGA-AA-A004-01	CMS3
TCGA-AA-A00A-01	CMS4
TCGA-AA-A00D-01	CMS1
TCGA-AA-A00E-01	CMS3
TCGA-AA-A00F-01	CMS4
TCGA-AA-A00K-01	CMS3
TCGA-AA-A00L-01	CMS2
TCGA-AA-A00O-01	CMS4
TCGA-AA-A00Q-01	CMS2
TCGA-AA-A00R-01	CMS1
TCGA-AA-A00U-01	CMS3
TCGA-AA-A00W-01	CMS2
TCGA-AA-A00Z-01	CMS2
TCGA-AA-A010-01	CMS1
TCGA-AA-A017-01	CMS2
TCGA-AA-A01C-01	CMS4
TCGA-AA-A01F-01	CMS2
TCGA-AA-A01K-01	CMS4
TCGA-AA-A01P-01	CMS1
TCGA-AA-A01Q-01	CMS3
TCGA-AA-A01S-01	CMS2
TCGA-AA-A01T-01	CMS2
TCGA-AA-A01V-01	CMS3
TCGA-AA-A01X-01	CMS2
TCGA-AA-A01Z-01	CMS2
TCGA-AA-A022-01	CMS1
TCGA-AA-A029-01	CMS3
TCGA-AA-A02E-01	CMS3
TCGA-AA-A02H-01	CMS2
TCGA-AA-A02J-01	CMS2
TCGA-AA-A02O-01	CMS3
TCGA-AA-A02R-01	CMS1
TCGA-AA-A02W-01	CMS2
TCGA-AA-A02Y-01	CMS3
TCGA-AA-A03J-01	CMS4
TCGA-AD-6548-01	CMS4
TCGA-AD-6888-01	CMS2
TCGA-AD-6889-01	CMS3
TCGA-AD-6895-01	CMS1
TCGA-AD-6965-01	CMS2
TCGA-AD-A5EJ-01	CMS3
TCGA-AD-A5EK-01	CMS2
TCGA-AM-5820-01	CMS4
TCGA-AM-5821-01	CMS1
TCGA-AU-3779-01	CMS4
TCGA-AU-6004-01	CMS1
TCGA-AY-4070-01	CMS4
TCGA-AY-5543-01	CMS2
TCGA-AY-6197-01	CMS3
TCGA-AY-6386-01	CMS3
TCGA-AY-A54L-01	CMS3
TCGA-AY-A69D-01	CMS3
TCGA-AY-A71X-01	CMS3
TCGA-AY-A8YK-01	CMS2
TCGA-AZ-4308-01	CMS4
TCGA-AZ-4313-01	CMS3
TCGA-AZ-4315-01	CMS3
TCGA-AZ-4614-01	CMS1
TCGA-AZ-4615-01	CMS1
TCGA-AZ-4616-01	CMS1
TCGA-AZ-4681-01	CMS2
TCGA-AZ-4682-01	CMS2
TCGA-AZ-4684-01	CMS4
TCGA-AZ-5403-01	CMS4
TCGA-AZ-5407-01	CMS3
TCGA-AZ-6598-01	CMS3
TCGA-AZ-6599-01	CMS3
TCGA-AZ-6600-01	CMS4
TCGA-AZ-6605-01	CMS4
TCGA-AZ-6606-01	CMS3
TCGA-AZ-6607-01	CMS4
TCGA-CA-5254-01	CMS1
TCGA-CA-5255-01	CMS3
TCGA-CA-5256-01	CMS2
TCGA-CA-5797-01	CMS4
TCGA-CA-6715-01	CMS2
TCGA-CA-6716-01	CMS4
TCGA-CA-6719-01	CMS4
TCGA-CK-4947-01	CMS4
TCGA-CK-4948-01	CMS4
TCGA-CK-5912-01	CMS2
TCGA-CK-5913-01	CMS1
TCGA-CK-5914-01	CMS2
TCGA-CK-5915-01	CMS2
TCGA-CK-5916-01	CMS1
TCGA-CK-6746-01	CMS1
TCGA-CK-6747-01	CMS3
TCGA-CM-4743-01	CMS1
TCGA-CM-4744-01	CMS3
TCGA-CM-4746-01	CMS3
TCGA-CM-4747-01	CMS2
TCGA-CM-4750-01	CMS2
TCGA-CM-4751-01	CMS1
TCGA-CM-4752-01	CMS4
TCGA-CM-5341-01	CMS4
TCGA-CM-5344-01	CMS4
TCGA-CM-5348-01	CMS4
TCGA-CM-5349-01	CMS4
TCGA-CM-5860-01	CMS4
TCGA-CM-5861-01	CMS3
TCGA-CM-5862-01	CMS2
TCGA-CM-5864-01	CMS2
TCGA-CM-5868-01	CMS4
TCGA-CM-6161-01	CMS2
TCGA-CM-6163-01	CMS4
TCGA-CM-6164-01	CMS2
TCGA-CM-6165-01	CMS4
TCGA-CM-6166-01	CMS2
TCGA-CM-6167-01	CMS4
TCGA-CM-6168-01	CMS4
TCGA-CM-6169-01	CMS4
TCGA-CM-6170-01	CMS4
TCGA-CM-6171-01	CMS3
TCGA-CM-6172-01	CMS3
TCGA-CM-6674-01	CMS1
TCGA-CM-6675-01	CMS1
TCGA-CM-6676-01	CMS2
TCGA-CM-6677-01	CMS4
TCGA-CM-6678-01	CMS2
TCGA-CM-6679-01	CMS4
TCGA-CM-6680-01	CMS3
TCGA-D5-5538-01	CMS4
TCGA-D5-5540-01	CMS2
TCGA-D5-5541-01	CMS4
TCGA-D5-6529-01	CMS4
TCGA-D5-6530-01	CMS3
TCGA-D5-6531-01	CMS4
TCGA-D5-6532-01	CMS2
TCGA-D5-6535-01	CMS4
TCGA-D5-6536-01	CMS3
TCGA-D5-6537-01	CMS2
TCGA-D5-6538-01	CMS2
TCGA-D5-6541-01	CMS4
TCGA-D5-6898-01	CMS4
TCGA-D5-6920-01	CMS3
TCGA-D5-6922-01	CMS4
TCGA-D5-6923-01	CMS4
TCGA-D5-6924-01	CMS4
TCGA-D5-6927-01	CMS4
TCGA-D5-6929-01	CMS4
TCGA-D5-6931-01	CMS1
TCGA-D5-6932-01	CMS4
TCGA-DM-A0X9-01	CMS3
TCGA-DM-A0XD-01	CMS4
TCGA-DM-A1D0-01	CMS2
TCGA-DM-A1D4-01	CMS3
TCGA-DM-A1D9-01	CMS2
TCGA-DM-A1DA-01	CMS1
TCGA-DM-A1DB-01	CMS2
TCGA-DM-A1HA-01	CMS1
TCGA-DM-A282-01	CMS2
TCGA-DM-A28A-01	CMS4
TCGA-DM-A28E-01	CMS2
TCGA-DM-A28F-01	CMS2
TCGA-DM-A28G-01	CMS3
TCGA-DM-A28H-01	CMS2
TCGA-DM-A28M-01	CMS3
TCGA-F4-6459-01	CMS4
TCGA-F4-6460-01	CMS4
TCGA-F4-6461-01	CMS3
TCGA-F4-6569-01	CMS4
TCGA-F4-6570-01	CMS1
TCGA-F4-6703-01	CMS4
TCGA-F4-6805-01	CMS4
TCGA-F4-6806-01	CMS3
TCGA-F4-6807-01	CMS4
TCGA-F4-6808-01	CMS2
TCGA-F4-6809-01	CMS4
TCGA-F4-6854-01	CMS4
TCGA-F4-6855-01	CMS4
TCGA-G4-6293-01	CMS3
TCGA-G4-6294-01	CMS2
TCGA-G4-6295-01	CMS2
TCGA-G4-6297-01	CMS4
TCGA-G4-6299-01	CMS4
TCGA-G4-6303-01	CMS4
TCGA-G4-6304-01	CMS2
TCGA-G4-6307-01	CMS2
TCGA-G4-6309-01	CMS1
TCGA-G4-6311-01	CMS4
TCGA-G4-6315-01	CMS2
TCGA-G4-6317-01	CMS2
TCGA-G4-6320-01	CMS3
TCGA-G4-6321-01	CMS3
TCGA-G4-6323-01	CMS3
TCGA-G4-6586-01	CMS1
TCGA-G4-6588-01	CMS1
TCGA-G4-6626-01	CMS2
TCGA-G4-6627-01	CMS4
TCGA-G4-6628-01	CMS1
TCGA-NH-A50T-01	CMS2
TCGA-NH-A50V-01	CMS4
TCGA-NH-A5IV-01	CMS3
TCGA-NH-A6GA-01	CMS4
TCGA-NH-A6GB-01	CMS2
TCGA-NH-A8F7-01	CMS2
TCGA-NH-A8F8-01	CMS4
TCGA-QG-A5YV-01	CMS2
TCGA-QG-A5YX-01	CMS3
TCGA-QG-A5Z1-01	CMS4
TCGA-QG-A5Z2-01	CMS3
TCGA-QL-A97D-01	CMS2
TCGA-SS-A7HO-01	CMS2

## Sheet: RiskScores_TCGA_COAD
Supplementary Data 1
Stromal signature, Epithelial signature and Signature ratio risk scores for n=359 coloncarcinoma patients from the TCGA Pan-Cancer Atlas; risk group assignment based on 50th percentile (median) cut-off
Patient_ID	Stromal_RiskScore	Epithelial_RiskScore	SignatureRatio_RiskScore	Risk_group
TCGA-3L-AA1B-01	4.39339	-4.27688	1.05522	Low
TCGA-4N-A93T-01	4.34771	-2.49433	3.03817	High
TCGA-5M-AAT4-01	4.50647	-3.69887	1.48435	High
TCGA-5M-AAT6-01	5.66308	-2.90026	3.81268	High
TCGA-5M-AATE-01	4.61045	-3.44238	1.79378	High
TCGA-A6-2671-01	4.56183	-3.29172	1.92057	High
TCGA-A6-2672-01	4.61173	-2.97119	2.40917	High
TCGA-A6-2675-01	4.44609	-4.12885	1.15957	Low
TCGA-A6-2676-01	5.06147	-2.83043	3.19779	High
TCGA-A6-2677-01	4.11211	-3.24814	1.60273	High
TCGA-A6-2678-01	4.48838	-3.81012	1.38772	Low
TCGA-A6-2679-01	4.85154	-4.74272	1.04642	Low
TCGA-A6-2680-01	4.2604	-3.52765	1.45858	High
TCGA-A6-2681-01	4.84005	-3.89404	1.5449	High
TCGA-A6-2682-01	5.25052	-4.02254	1.70374	High
TCGA-A6-2683-01	4.31676	-3.83975	1.2639	Low
TCGA-A6-2684-01	4.24563	-4.06946	1.08846	Low
TCGA-A6-2685-01	4.59662	-3.22189	2.03543	High
TCGA-A6-2686-01	4.83398	-3.3348	2.10121	High
TCGA-A6-3807-01	4.20186	-3.98549	1.11152	Low
TCGA-A6-3808-01	4.83265	-4.04812	1.42516	Low
TCGA-A6-3810-01	4.89071	-3.97561	1.51334	High
TCGA-A6-4105-01	4.76673	-3.64706	1.70826	High
TCGA-A6-4107-01	4.55014	-4.35582	1.09122	Low
TCGA-A6-5656-01	4.80003	-4.21666	1.29584	Low
TCGA-A6-5657-01	4.53144	-3.98663	1.29199	Low
TCGA-A6-5659-01	4.95671	-3.69537	1.79917	High
TCGA-A6-5660-01	4.5728	-4.03358	1.28524	Low
TCGA-A6-5661-01	4.56533	-2.75415	2.7477	High
TCGA-A6-5662-01	4.66822	-3.96075	1.38915	Low
TCGA-A6-5664-01	4.35535	-4.36034	0.997713	Low
TCGA-A6-5665-01	4.39089	-3.16926	1.91951	High
TCGA-A6-5666-01	4.63781	-3.83101	1.46555	High
TCGA-A6-5667-01	4.96726	-3.145	2.49456	High
TCGA-A6-6137-01	4.19124	-3.96281	1.11861	Low
TCGA-A6-6138-01	4.57281	-3.7879	1.45737	High
TCGA-A6-6140-01	4.37672	-3.54671	1.52281	High
TCGA-A6-6141-01	4.21867	-3.78668	1.24118	Low
TCGA-A6-6142-01	4.85988	-4.4132	1.21267	Low
TCGA-A6-6648-01	3.80241	-3.4652	1.2041	Low
TCGA-A6-6649-01	3.97511	-4.09315	0.943156	Low
TCGA-A6-6650-01	3.93051	-3.15055	1.55642	High
TCGA-A6-6651-01	5.32424	-3.68776	2.08444	High
TCGA-A6-6652-01	4.45639	-3.73032	1.42716	Low
TCGA-A6-6653-01	4.4853	-3.97171	1.27535	Low
TCGA-A6-6654-01	4.8747	-4.23091	1.32748	Low
TCGA-A6-6782-01	4.8873	-3.50863	1.94027	High
TCGA-A6-A567-01	4.26862	-3.88419	1.20774	Low
TCGA-A6-A56B-01	4.30151	-3.28917	1.71029	High
TCGA-A6-A5ZU-01	5.07518	-4.52714	1.25677	Low
TCGA-AA-3488-01	4.00384	-3.04941	1.72395	High
TCGA-AA-3489-01	5.30902	-2.80015	3.59472	High
TCGA-AA-3492-01	4.46921	-3.40068	1.72715	High
TCGA-AA-3494-01	4.1628	-3.70289	1.26383	Low
TCGA-AA-3495-01	4.2205	-4.05161	1.0851	Low
TCGA-AA-3496-01	4.58892	-3.61303	1.61316	High
TCGA-AA-3502-01	4.08847	-4.50723	0.822814	Low
TCGA-AA-3506-01	4.57148	-4.14081	1.21883	Low
TCGA-AA-3510-01	4.52883	-3.83394	1.39535	Low
TCGA-AA-3511-01	4.59727	-4.75109	0.936295	Low
TCGA-AA-3514-01	4.5827	-4.15347	1.21736	Low
TCGA-AA-3517-01	4.25754	-4.14498	1.05505	Low
TCGA-AA-3518-01	4.17131	-3.58009	1.35755	Low
TCGA-AA-3519-01	4.33498	-4.19912	1.06576	Low
TCGA-AA-3520-01	4.38626	-3.31284	1.75303	High
TCGA-AA-3522-01	4.13776	-4.35771	0.901599	Low
TCGA-AA-3524-01	4.47993	-4.07253	1.21008	Low
TCGA-AA-3525-01	4.50802	-3.81786	1.39422	Low
TCGA-AA-3526-01	4.54267	-4.0051	1.28646	Low
TCGA-AA-3527-01	4.39295	-4.21577	1.08582	Low
TCGA-AA-3529-01	4.10878	-3.79562	1.17182	Low
TCGA-AA-3530-01	4.3771	-3.568	1.50496	High
TCGA-AA-3531-01	4.50903	-3.44012	1.71798	High
TCGA-AA-3532-01	4.44604	-3.08757	2.07354	High
TCGA-AA-3534-01	4.20527	-3.75665	1.2531	Low
TCGA-AA-3538-01	4.50461	-3.62836	1.54132	High
TCGA-AA-3542-01	4.15798	-3.81107	1.19034	Low
TCGA-AA-3544-01	4.57857	-3.88208	1.39101	Low
TCGA-AA-3548-01	4.12585	-3.81755	1.16804	Low
TCGA-AA-3549-01	4.71279	-4.06238	1.34585	Low
TCGA-AA-3552-01	3.71029	-3.36353	1.21682	Low
TCGA-AA-3553-01	4.49109	-4.14448	1.17426	Low
TCGA-AA-3560-01	4.49331	-4.18041	1.1553	Low
TCGA-AA-3561-01	4.36881	-3.942	1.22827	Low
TCGA-AA-3655-01	4.6758	-4.00201	1.36507	Low
TCGA-AA-3660-01	4.29135	-3.41719	1.57707	High
TCGA-AA-3663-01	4.06815	-3.44785	1.39218	Low
TCGA-AA-3664-01	3.99831	-3.6803	1.18028	Low
TCGA-AA-3666-01	4.41364	-3.45013	1.63652	High
TCGA-AA-3667-01	4.23104	-3.15764	1.79543	High
TCGA-AA-3673-01	4.36975	-4.06856	1.15354	Low
TCGA-AA-3675-01	4.15886	-3.91739	1.12708	Low
TCGA-AA-3678-01	4.17905	-3.59221	1.35342	Low
TCGA-AA-3679-01	4.07233	-3.85498	1.11594	Low
TCGA-AA-3680-01	4.11103	-3.2289	1.62104	High
TCGA-AA-3681-01	3.97445	-3.63969	1.19241	Low
TCGA-AA-3685-01	4.61698	-4.14642	1.23985	Low
TCGA-AA-3688-01	4.31434	-3.83404	1.26624	Low
TCGA-AA-3693-01	4.40763	-3.82337	1.32898	Low
TCGA-AA-3695-01	5.86666	-3.40386	2.97056	High
TCGA-AA-3696-01	4.43805	-3.33844	1.76725	High
TCGA-AA-3710-01	4.65126	-3.23535	2.06681	High
TCGA-AA-3712-01	4.52753	-4.07169	1.23644	Low
TCGA-AA-3713-01	4.24809	-3.3798	1.57981	High
TCGA-AA-3715-01	4.72371	-3.83651	1.51598	High
TCGA-AA-3811-01	4.60377	-2.83078	2.64493	High
TCGA-AA-3812-01	4.55898	-4.07546	1.25136	Low
TCGA-AA-3814-01	4.5769	-4.06634	1.26688	Low
TCGA-AA-3818-01	4.47334	-4.12012	1.17881	Low
TCGA-AA-3819-01	4.09881	-3.41107	1.44389	Low
TCGA-AA-3831-01	4.04595	-3.90922	1.07118	Low
TCGA-AA-3833-01	4.57305	-3.96588	1.32963	Low
TCGA-AA-3841-01	4.69517	-3.85671	1.48207	High
TCGA-AA-3842-01	4.44995	-3.72306	1.4286	Low
TCGA-AA-3844-01	4.0842	-4.01784	1.03331	Low
TCGA-AA-3845-01	4.74167	-2.77939	2.91047	High
TCGA-AA-3846-01	4.23102	-3.64242	1.34931	Low
TCGA-AA-3848-01	4.03005	-3.88337	1.07697	Low
TCGA-AA-3850-01	4.18694	-4.13089	1.02732	Low
TCGA-AA-3851-01	4.47355	-3.95247	1.28105	Low
TCGA-AA-3855-01	4.30616	-3.86618	1.24056	Low
TCGA-AA-3856-01	4.00418	-3.2818	1.48869	High
TCGA-AA-3858-01	4.23005	-3.14133	1.81327	High
TCGA-AA-3864-01	4.5005	-3.55225	1.60515	High
TCGA-AA-3866-01	4.70906	-3.55759	1.75209	High
TCGA-AA-3867-01	4.3884	-3.50453	1.56803	High
TCGA-AA-3869-01	4.19477	-4.17589	1.00906	Low
TCGA-AA-3870-01	4.70513	-4.68598	1.00819	Low
TCGA-AA-3872-01	4.81806	-3.63306	1.75872	High
TCGA-AA-3875-01	4.02979	-3.09483	1.69548	High
TCGA-AA-3930-01	4.35737	-2.22175	3.84645	High
TCGA-AA-3939-01	4.47432	-4.25044	1.10812	Low
TCGA-AA-3941-01	4.27338	-4.06346	1.10599	Low
TCGA-AA-3952-01	4.66652	-3.2919	2.00952	High
TCGA-AA-3955-01	4.31774	-3.98314	1.17506	Low
TCGA-AA-3956-01	4.25925	-3.60861	1.39311	Low
TCGA-AA-3968-01	4.39637	-3.5223	1.55789	High
TCGA-AA-3971-01	4.36781	-3.22713	1.83186	High
TCGA-AA-3973-01	4.90554	-3.51974	1.94246	High
TCGA-AA-3975-01	4.42919	-4.02259	1.21237	Low
TCGA-AA-3976-01	4.40168	-4.02913	1.19348	Low
TCGA-AA-3979-01	3.60338	-3.05998	1.38671	Low
TCGA-AA-3980-01	3.91419	-3.78973	1.06676	Low
TCGA-AA-3982-01	4.50705	-3.12997	2.0735	High
TCGA-AA-3984-01	4.57395	-2.98178	2.35306	High
TCGA-AA-3986-01	4.25514	-3.5283	1.45444	Low
TCGA-AA-3989-01	4.17766	-3.81381	1.19991	Low
TCGA-AA-A004-01	4.02464	-3.92499	1.05142	Low
TCGA-AA-A00A-01	4.24378	-3.51914	1.45423	Low
TCGA-AA-A00D-01	4.69649	-3.83816	1.49728	High
TCGA-AA-A00E-01	4.77902	-3.64316	1.72077	High
TCGA-AA-A00F-01	4.69578	-3.7643	1.55613	High
TCGA-AA-A00K-01	4.86433	-3.52164	1.9079	High
TCGA-AA-A00L-01	4.34127	-4.19728	1.06979	Low
TCGA-AA-A00O-01	4.35183	-3.8644	1.26818	Low
TCGA-AA-A00Q-01	4.49844	-3.35598	1.79674	High
TCGA-AA-A00R-01	4.49137	-2.42554	3.42878	High
TCGA-AA-A00U-01	4.41674	-4.07269	1.17609	Low
TCGA-AA-A00W-01	4.40738	-3.79379	1.34963	Low
TCGA-AA-A00Z-01	4.3904	-3.26935	1.80338	High
TCGA-AA-A010-01	4.50738	-2.61608	2.96857	High
TCGA-AA-A017-01	4.35959	-3.59075	1.47408	High
TCGA-AA-A01C-01	4.73591	-2.9407	2.59362	High
TCGA-AA-A01F-01	4.27152	-3.99253	1.14464	Low
TCGA-AA-A01I-01	4.40747	-4.42262	0.993157	Low
TCGA-AA-A01K-01	4.50087	-4.39244	1.04998	Low
TCGA-AA-A01P-01	4.94706	-2.67648	3.41637	High
TCGA-AA-A01Q-01	4.74565	-3.9814	1.42076	Low
TCGA-AA-A01S-01	3.84502	-3.65936	1.10404	Low
TCGA-AA-A01T-01	4.83405	-3.82079	1.60072	High
TCGA-AA-A01V-01	4.09834	-4.85017	0.714005	Low
TCGA-AA-A01X-01	4.28006	-3.45729	1.5326	High
TCGA-AA-A01Z-01	4.16203	-4.15506	1.00336	Low
TCGA-AA-A022-01	5.26351	-3.02809	3.02143	High
TCGA-AA-A029-01	4.4125	-4.14541	1.13301	Low
TCGA-AA-A02E-01	4.48357	-3.36819	1.77196	High
TCGA-AA-A02F-01	4.49237	-4.21705	1.13484	Low
TCGA-AA-A02H-01	4.58314	-2.91452	2.47282	High
TCGA-AA-A02J-01	4.58738	-3.97203	1.33384	Low
TCGA-AA-A02O-01	4.86725	-4.247	1.31341	Low
TCGA-AA-A02R-01	5.16351	-2.86925	3.23858	High
TCGA-AA-A02W-01	4.66459	-3.60074	1.6782	High
TCGA-AA-A02Y-01	4.55077	-4.56347	0.994442	Low
TCGA-AA-A03J-01	4.4347	-3.46169	1.64117	High
TCGA-AD-6548-01	4.86788	-3.61986	1.80841	High
TCGA-AD-6888-01	4.9741	-4.51927	1.21141	Low
TCGA-AD-6889-01	4.83912	-3.93003	1.51615	High
TCGA-AD-6895-01	5.01927	-3.88974	1.6651	High
TCGA-AD-6965-01	4.50296	-3.84499	1.37153	Low
TCGA-AD-A5EJ-01	4.80917	-4.35133	1.2215	Low
TCGA-AD-A5EK-01	4.29679	-4.13841	1.078	Low
TCGA-AM-5820-01	4.89969	-3.41918	2.0535	High
TCGA-AM-5821-01	5.1554	-4.26384	1.46191	High
TCGA-AU-3779-01	4.5548	-3.89452	1.36783	Low
TCGA-AU-6004-01	4.43949	-4.18247	1.12668	Low
TCGA-AY-4070-01	4.79538	-3.21754	2.22125	High
TCGA-AY-5543-01	3.98271	-3.84305	1.074	Low
TCGA-AY-6197-01	3.97706	-3.90888	1.03519	Low
TCGA-AY-6386-01	4.06858	-3.51521	1.33962	Low
TCGA-AY-A54L-01	4.42343	-3.89663	1.28867	Low
TCGA-AY-A69D-01	4.02708	-3.76546	1.14379	Low
TCGA-AY-A71X-01	4.10782	-4.4546	0.850368	Low
TCGA-AY-A8YK-01	4.82706	-3.83859	1.58133	High
TCGA-AZ-4308-01	4.94481	-4.12674	1.43577	Low
TCGA-AZ-4313-01	4.41004	-3.61087	1.49163	High
TCGA-AZ-4315-01	4.40865	-3.9979	1.21604	Low
TCGA-AZ-4323-01	4.57971	-2.75121	2.77095	High
TCGA-AZ-4614-01	4.5959	-4.1843	1.20641	Low
TCGA-AZ-4615-01	4.77898	-3.38142	1.99743	High
TCGA-AZ-4616-01	5.13507	-3.46249	2.19946	High
TCGA-AZ-4681-01	3.80936	-4.06931	0.876321	Low
TCGA-AZ-4682-01	4.75021	-3.82952	1.53864	High
TCGA-AZ-4684-01	4.3961	-3.05024	2.07715	High
TCGA-AZ-5403-01	5.07064	-3.39015	2.23711	High
TCGA-AZ-5407-01	3.82966	-4.26964	0.80452	Low
TCGA-AZ-6598-01	5.41956	-3.36864	2.58833	High
TCGA-AZ-6599-01	4.91453	-4.77755	1.05816	Low
TCGA-AZ-6600-01	4.81562	-3.52211	1.86938	High
TCGA-AZ-6605-01	4.87392	-3.56088	1.87345	High
TCGA-AZ-6606-01	4.48688	-3.53023	1.61542	High
TCGA-AZ-6607-01	4.95177	-3.53455	1.96269	High
TCGA-CA-5254-01	4.87238	-4.45215	1.19769	Low
TCGA-CA-5255-01	4.48576	-4.11345	1.18922	Low
TCGA-CA-5256-01	4.42118	-3.228	1.8759	High
TCGA-CA-5797-01	4.83042	-3.95554	1.49127	High
TCGA-CA-6715-01	4.83832	-3.80391	1.61781	High
TCGA-CA-6716-01	4.45434	-4.1414	1.15684	Low
TCGA-CA-6718-01	4.73739	-3.36723	1.97939	High
TCGA-CA-6719-01	5.00793	-3.4084	2.15881	High
TCGA-CK-4947-01	4.45082	-4.44274	1.00364	Low
TCGA-CK-4948-01	4.67218	-2.93291	2.5377	High
TCGA-CK-5912-01	4.32506	-3.5488	1.48533	High
TCGA-CK-5913-01	4.75506	-3.85328	1.52283	High
TCGA-CK-5914-01	4.36638	-3.84447	1.28994	Low
TCGA-CK-5915-01	4.51463	-3.67884	1.50599	High
TCGA-CK-5916-01	4.84638	-3.52828	1.88672	High
TCGA-CK-6746-01	4.58077	-4.20351	1.18755	Low
TCGA-CK-6747-01	4.51614	-3.85824	1.37011	Low
TCGA-CM-4743-01	5.03245	-2.50672	4.03039	High
TCGA-CM-4744-01	4.68651	-4.02919	1.35289	Low
TCGA-CM-4746-01	4.25579	-3.45659	1.51588	High
TCGA-CM-4747-01	4.75995	-3.93027	1.46676	High
TCGA-CM-4750-01	4.70838	-3.90524	1.45361	Low
TCGA-CM-4751-01	4.70873	-3.76159	1.56698	High
TCGA-CM-4752-01	4.95548	-3.76147	1.73563	High
TCGA-CM-5341-01	5.21235	-4.06416	1.64485	High
TCGA-CM-5344-01	5.30068	-3.67033	2.08571	High
TCGA-CM-5348-01	5.16485	-2.93941	3.08742	High
TCGA-CM-5349-01	4.78165	-4.10309	1.3581	Low
TCGA-CM-5860-01	4.92223	-4.62109	1.13458	Low
TCGA-CM-5861-01	5.30622	-4.86828	1.18801	Low
TCGA-CM-5862-01	4.85084	-3.77272	1.65319	High
TCGA-CM-5864-01	4.27408	-4.05636	1.11023	Low
TCGA-CM-5868-01	5.0616	-3.28589	2.37285	High
TCGA-CM-6161-01	4.2367	-3.13685	1.82418	High
TCGA-CM-6163-01	4.74034	-3.24343	2.13605	High
TCGA-CM-6164-01	4.90439	-3.7195	1.7386	High
TCGA-CM-6165-01	4.89515	-3.82351	1.63911	High
TCGA-CM-6166-01	5.1647	-3.3934	2.31643	High
TCGA-CM-6167-01	5.09306	-3.45349	2.17491	High
TCGA-CM-6168-01	4.81454	-3.9208	1.50786	High
TCGA-CM-6169-01	5.07307	-4.40622	1.3256	Low
TCGA-CM-6170-01	4.66327	-3.71162	1.57853	High
TCGA-CM-6171-01	4.65611	-3.8408	1.46961	High
TCGA-CM-6172-01	4.10464	-3.81882	1.15529	Low
TCGA-CM-6674-01	5.02812	-4.7837	1.1048	Low
TCGA-CM-6675-01	4.03946	-3.33367	1.46826	High
TCGA-CM-6676-01	4.80268	-2.93202	2.68308	High
TCGA-CM-6677-01	4.66416	-3.21402	2.10596	High
TCGA-CM-6678-01	5.1852	-3.75428	1.90755	High
TCGA-CM-6679-01	4.92432	-3.43764	2.05198	High
TCGA-CM-6680-01	4.61966	-4.4193	1.09273	Low
TCGA-D5-5538-01	4.87926	-4.29456	1.29083	Low
TCGA-D5-5540-01	4.56944	-3.1262	2.13645	High
TCGA-D5-5541-01	5.0215	-3.64994	1.89276	High
TCGA-D5-6529-01	4.60406	-4.10073	1.26055	Low
TCGA-D5-6530-01	4.19887	-4.33882	0.936527	Low
TCGA-D5-6531-01	4.76377	-4.47841	1.1315	Low
TCGA-D5-6532-01	4.58309	-4.18063	1.2018	Low
TCGA-D5-6535-01	4.27306	-3.23352	1.74634	High
TCGA-D5-6536-01	5.02054	-5.06739	0.981595	Low
TCGA-D5-6537-01	4.32461	-4.28414	1.01898	Low
TCGA-D5-6538-01	3.96131	-3.8852	1.03956	Low
TCGA-D5-6541-01	4.47138	-4.20695	1.12966	Low
TCGA-D5-6898-01	4.96748	-3.66475	1.83731	High
TCGA-D5-6920-01	4.08748	-3.96277	1.06393	Low
TCGA-D5-6922-01	5.00053	-3.50652	2.03367	High
TCGA-D5-6923-01	4.44548	-4.09796	1.1768	Low
TCGA-D5-6924-01	4.60554	-3.52258	1.70938	High
TCGA-D5-6926-01	4.83619	-3.70859	1.70055	High
TCGA-D5-6927-01	4.85094	-3.60107	1.81463	High
TCGA-D5-6929-01	4.74049	-3.50124	1.83317	High
TCGA-D5-6931-01	4.56488	-3.74439	1.48627	High
TCGA-D5-6932-01	4.83317	-3.87274	1.5575	High
TCGA-DM-A0X9-01	4.55406	-4.25382	1.14615	Low
TCGA-DM-A0XD-01	4.94981	-4.80147	1.06274	Low
TCGA-DM-A1D0-01	4.29286	-4.38056	0.960361	Low
TCGA-DM-A1D4-01	4.29916	-3.55977	1.45856	High
TCGA-DM-A1D9-01	4.5467	-3.20564	2.0117	High
TCGA-DM-A1DA-01	4.41648	-3.01557	2.14493	High
TCGA-DM-A1DB-01	4.68515	-4.24911	1.21577	Low
TCGA-DM-A1HA-01	3.90471	-4.72399	0.683216	Low
TCGA-DM-A282-01	4.99139	-4.0806	1.49622	High
TCGA-DM-A28A-01	4.66639	-3.43753	1.84276	High
TCGA-DM-A28C-01	4.06325	-3.49204	1.35391	Low
TCGA-DM-A28E-01	4.1283	-3.46547	1.41912	Low
TCGA-DM-A28F-01	4.65569	-3.16504	2.16377	High
TCGA-DM-A28G-01	4.29517	-3.38645	1.60868	High
TCGA-DM-A28H-01	4.5189	-3.07778	2.15571	High
TCGA-DM-A28M-01	4.44976	-4.0834	1.18749	Low
TCGA-F4-6459-01	5.57902	-3.2634	2.92265	High
TCGA-F4-6460-01	4.20578	-3.70335	1.28975	Low
TCGA-F4-6461-01	4.65434	-3.59466	1.67649	High
TCGA-F4-6569-01	5.03436	-4.81431	1.0935	Low
TCGA-F4-6570-01	4.65461	-3.08754	2.2727	High
TCGA-F4-6703-01	4.76808	-3.7328	1.63161	High
TCGA-F4-6805-01	4.65969	-3.91797	1.41446	Low
TCGA-F4-6806-01	4.63714	-4.09142	1.28455	Low
TCGA-F4-6807-01	4.8776	-3.37332	2.09072	High
TCGA-F4-6808-01	5.25125	-4.55184	1.33092	Low
TCGA-F4-6809-01	4.8944	-3.01525	2.63483	High
TCGA-F4-6854-01	4.70462	-3.71624	1.60266	High
TCGA-F4-6855-01	5.08057	-3.82532	1.76396	High
TCGA-G4-6293-01	3.88742	-3.62413	1.15058	Low
TCGA-G4-6294-01	4.69941	-4.52287	1.07959	Low
TCGA-G4-6295-01	3.96576	-3.04034	1.70141	High
TCGA-G4-6297-01	4.79085	-4.05394	1.3966	Low
TCGA-G4-6298-01	4.97501	-3.43069	2.10293	High
TCGA-G4-6299-01	5.06775	-3.57411	2.01046	High
TCGA-G4-6303-01	4.58264	-3.00619	2.3238	High
TCGA-G4-6304-01	4.36927	-2.85014	2.35009	High
TCGA-G4-6307-01	4.60906	-4.18549	1.21264	Low
TCGA-G4-6309-01	4.67912	-3.50505	1.78213	High
TCGA-G4-6311-01	4.64542	-3.53534	1.72658	High
TCGA-G4-6315-01	4.17853	-3.72379	1.25915	Low
TCGA-G4-6317-01	4.744	-4.3405	1.19456	Low
TCGA-G4-6320-01	4.06505	-4.3044	0.891879	Low
TCGA-G4-6321-01	4.72564	-3.48796	1.8356	High
TCGA-G4-6323-01	3.81688	-4.50537	0.717721	Low
TCGA-G4-6586-01	4.79274	-3.54808	1.82466	High
TCGA-G4-6588-01	4.42908	-3.32004	1.77968	High
TCGA-G4-6626-01	4.54157	-2.68993	2.85056	High
TCGA-G4-6627-01	4.82141	-4.07838	1.39756	Low
TCGA-G4-6628-01	4.67454	-3.36366	1.93132	High
TCGA-NH-A50T-01	4.1183	-2.80159	2.16086	High
TCGA-NH-A50V-01	5.00792	-3.23265	2.39992	High
TCGA-NH-A5IV-01	4.38405	-3.29833	1.7667	High
TCGA-NH-A6GA-01	4.70243	-4.63974	1.02721	Low
TCGA-NH-A6GB-01	4.35608	-4.16484	1.09394	Low
TCGA-NH-A8F7-01	4.40089	-3.72442	1.39625	Low
TCGA-NH-A8F8-01	4.40763	-3.8373	1.31935	Low
TCGA-QG-A5YV-01	4.13344	-3.69092	1.25417	Low
TCGA-QG-A5YX-01	4.37328	-3.00453	2.11867	High
TCGA-QG-A5Z1-01	4.76139	-3.8412	1.53651	High
TCGA-QG-A5Z2-01	4.15034	-3.29266	1.58881	High
TCGA-QL-A97D-01	3.80568	-3.04802	1.55894	High
TCGA-RU-A8FL-01	4.07305	-3.84769	1.12057	Low
TCGA-SS-A7HO-01	4.07171	-3.73748	1.18685	Low
TCGA-T9-A92H-01	4.41742	-3.53932	1.55775	High

## Sheet: RiskScores_GSE17538
Supplementary Data 1
Stromal signature, Epithelial signature and Signature ratio risk scores for n=229 coloncarcinoma patients from the GSE17538 cohort; risk group assignment based on 50th percentile (median) cut-off
Patient_ID	Stromal_RiskScore	Epithelial_RiskScore	SignatureRatio_RiskScore	Risk_group
GSM437093	3.87124	-2.78969	1.9257	Low
GSM437094	3.83061	-2.36182	2.63053	High
GSM437095	3.72225	-2.53702	2.15261	Low
GSM437096	3.60317	-2.4169	2.22254	Low
GSM437097	4.09959	-2.25892	3.29367	High
GSM437098	3.84936	-2.5827	2.22142	Low
GSM437099	3.05506	-2.86128	1.14004	Low
GSM437100	4.01538	-2.78491	2.0789	Low
GSM437101	3.02326	-3.07009	0.969725	Low
GSM437102	4.30825	-2.20534	3.81636	High
GSM437103	4.27098	-2.58431	2.73128	High
GSM437104	3.23814	-2.3311	1.92961	Low
GSM437105	3.30998	-3.5987	0.845979	Low
GSM437106	4.08932	-2.33578	3.06506	High
GSM437107	3.93084	-3.11286	1.5946	Low
GSM437108	3.79135	-2.10077	3.25711	High
GSM437109	3.7761	-2.61361	2.0874	Low
GSM437110	3.54355	-2.75019	1.66016	Low
GSM437111	3.3316	-2.46025	1.83378	Low
GSM437112	3.9222	-2.99006	1.72068	Low
GSM437113	3.78493	-2.66664	2.01459	Low
GSM437114	3.52469	-2.44553	2.07729	Low
GSM437115	3.20745	-2.63732	1.47909	Low
GSM437116	3.84531	-2.63978	2.12191	Low
GSM437117	4.31715	-2.72856	2.50339	High
GSM437118	4.11441	-2.3355	3.10353	High
GSM437119	4.72623	-2.72515	3.0078	High
GSM437120	3.80833	-2.59053	2.16118	Low
GSM437121	4.13711	-1.81832	5.1767	High
GSM437122	3.98162	-2.01212	3.9157	High
GSM437123	3.8208	-2.23647	2.91865	High
GSM437124	4.15114	-2.35457	3.10821	High
GSM437125	4.22646	-2.43578	3.01077	High
GSM437126	3.85234	-3.15281	1.49299	Low
GSM437127	4.23301	-2.62971	2.5911	High
GSM437128	4.08585	-2.59956	2.47038	Low
GSM437129	4.08775	-2.19148	3.47931	High
GSM437130	4.49269	-2.2179	4.10325	High
GSM437131	4.04122	-2.66636	2.29714	Low
GSM437132	4.00344	-2.86019	1.9592	Low
GSM437133	4.83575	-2.47941	3.80391	High
GSM437134	3.76022	-2.94519	1.63005	Low
GSM437135	4.17046	-2.61568	2.54213	High
GSM437136	3.50746	-2.52559	1.92867	Low
GSM437137	3.99975	-2.5407	2.47833	High
GSM437138	4.25108	-2.05954	4.26046	High
GSM437139	4.06075	-2.60939	2.42178	Low
GSM437140	3.48691	-2.92325	1.42282	Low
GSM437141	3.76122	-2.72691	1.90246	Low
GSM437142	4.30625	-2.19057	3.86443	High
GSM437143	3.58935	-3.25011	1.21965	Low
GSM437144	4.4549	-2.11559	4.43417	High
GSM437145	4.4166	-2.61347	2.85589	High
GSM437146	3.73513	-2.65769	1.97517	Low
GSM437147	4.38421	-2.2253	3.88155	High
GSM437148	3.70462	-2.66711	1.92932	Low
GSM437149	4.2956	-2.46668	3.03266	High
GSM437150	3.26761	-2.62278	1.55216	Low
GSM437151	3.84477	-2.79121	1.89739	Low
GSM437152	3.79314	-2.05534	3.40588	High
GSM437153	3.15551	-2.60653	1.46559	Low
GSM437154	3.61362	-2.83955	1.61952	Low
GSM437155	4.23806	-2.77853	2.3265	Low
GSM437156	4.61688	-2.58299	3.19486	High
GSM437157	3.90286	-3.39556	1.32112	Low
GSM437158	3.11738	-2.293	1.84829	Low
GSM437159	3.70699	-2.4139	2.35833	Low
GSM437160	3.58543	-2.37513	2.27881	Low
GSM437161	4.08423	-2.37602	2.95475	High
GSM437162	3.76218	-2.42325	2.41037	Low
GSM437163	3.71641	-2.19085	2.87755	High
GSM437164	3.39638	-2.83574	1.4345	Low
GSM437165	3.44669	-2.50315	1.89596	Low
GSM437166	3.78731	-2.56636	2.17785	Low
GSM437167	3.74476	-3.2214	1.35132	Low
GSM437168	3.46976	-2.52466	1.88883	Low
GSM437169	4.11282	-2.66608	2.37977	Low
GSM437170	3.86937	-2.65245	2.12807	Low
GSM437171	3.91922	-2.47351	2.51057	High
GSM437172	3.67493	-2.87066	1.63883	Low
GSM437173	4.16398	-1.99289	4.36566	High
GSM437174	4.63987	-2.63047	3.11131	High
GSM437175	4.35987	-2.27775	3.66381	High
GSM437176	4.59603	-2.11113	4.73955	High
GSM437177	4.05014	-2.97312	1.85573	Low
GSM437178	4.26845	-2.28036	3.50376	High
GSM437179	3.89137	-2.92364	1.77156	Low
GSM437180	4.45876	-2.41604	3.4058	High
GSM437181	4.43843	-2.35198	3.56114	High
GSM437182	4.17527	-1.96848	4.49892	High
GSM437183	3.77343	-2.55973	2.17313	Low
GSM437184	4.3359	-2.41542	3.22234	High
GSM437185	3.75963	-2.35845	2.54119	High
GSM437186	3.73221	-2.53759	2.16317	Low
GSM437187	3.98682	-2.42352	2.70619	High
GSM437188	4.08836	-3.00563	1.85024	Low
GSM437189	4.08789	-2.98112	1.88036	Low
GSM437190	4.41395	-2.38293	3.4311	High
GSM437191	4.07221	-2.54014	2.57008	High
GSM437192	3.95852	-2.46272	2.58367	High
GSM437193	4.28506	-2.18558	3.84397	High
GSM437194	3.7072	-2.60982	2.01776	Low
GSM437195	3.96007	-2.18274	3.29155	High
GSM437196	4.35219	-2.73205	2.53769	High
GSM437197	4.09831	-3.068	1.78443	Low
GSM437198	4.19585	-2.77087	2.29301	Low
GSM437199	3.69856	-2.88673	1.64155	Low
GSM437200	4.85432	-1.86293	6.78994	High
GSM437201	4.25783	-2.36976	3.22826	High
GSM437202	4.27768	-2.50691	2.91165	High
GSM437203	4.00158	-2.90714	1.89466	Low
GSM437204	3.98781	-2.38429	2.79737	High
GSM437205	3.14534	-3.06187	1.05527	Low
GSM437206	3.79312	-2.96821	1.63307	Low
GSM437207	4.37932	-2.59284	2.85274	High
GSM437208	4.11723	-3.01651	1.86295	Low
GSM437209	4.33679	-2.80978	2.38228	Low
GSM437210	4.49046	-2.20542	4.14573	High
GSM437211	4.03022	-2.39198	2.83884	High
GSM437212	4.14044	-2.34415	3.11977	High
GSM437213	3.44666	-2.58731	1.7746	Low
GSM437214	3.52577	-2.70666	1.69684	Low
GSM437215	3.73571	-2.22234	2.82571	High
GSM437216	3.509	-2.46275	2.03014	Low
GSM437217	4.26465	-2.19958	3.75912	High
GSM437218	3.91658	-2.3427	2.795	High
GSM437219	2.51166	-2.65788	0.893004	Low
GSM437220	3.63658	-2.93364	1.53664	Low
GSM437221	3.76664	-3.06835	1.50695	Low
GSM437222	4.16451	-2.55011	2.66692	High
GSM437223	4.63382	-2.51154	3.40405	High
GSM437224	4.1268	-3.08759	1.78644	Low
GSM437225	3.99072	-3.07163	1.68797	Low
GSM437226	3.77188	-2.45276	2.36486	Low
GSM437227	4.50684	-2.5645	3.08845	High
GSM437228	3.58301	-3.07052	1.36167	Low
GSM437229	4.35491	-2.86986	2.3027	Low
GSM437230	3.31276	-2.54773	1.69073	Low
GSM437231	4.06118	-2.34672	2.9949	High
GSM437232	3.41708	-3.13118	1.19095	Low
GSM437233	4.17185	-2.29169	3.31395	High
GSM437234	4.31472	-2.18777	3.88957	High
GSM437235	4.47268	-1.99084	5.04736	High
GSM437236	4.37616	-2.9357	2.22209	Low
GSM437237	4.28513	-2.30305	3.46196	High
GSM437238	3.93772	-2.75346	2.04519	Low
GSM437239	4.52097	-2.34949	3.70269	High
GSM437240	3.81534	-2.56578	2.21121	Low
GSM437241	3.82987	-1.95624	3.83288	High
GSM437242	4.11456	-2.3692	3.01608	High
GSM437243	4.14192	-2.73959	2.28577	Low
GSM437244	4.27594	-2.71123	2.48731	High
GSM437245	4.39855	-2.41046	3.32982	High
GSM437246	3.3807	-2.5398	1.7718	Low
GSM437247	4.03483	-2.39679	2.83395	High
GSM437248	4.28679	-1.89456	5.11972	High
GSM437249	4.0405	-2.55961	2.49185	High
GSM437250	4.39843	-2.24638	3.8338	High
GSM437251	4.18311	-2.45351	2.90685	High
GSM437252	2.55588	-2.63812	0.938622	Low
GSM437253	3.91052	-2.42861	2.5927	High
GSM437254	3.32557	-2.0533	2.62317	High
GSM437255	2.99034	-2.97568	1.00988	Low
GSM437256	3.28604	-2.64689	1.54126	Low
GSM437257	4.43273	-2.18518	4.115	High
GSM437258	3.07295	-2.78532	1.2172	Low
GSM437259	3.75611	-2.88329	1.69707	Low
GSM437260	3.66156	-2.30147	2.53118	High
GSM437261	3.38011	-2.82446	1.43216	Low
GSM437262	4.05336	-2.83775	2.04025	Low
GSM437263	4.48431	-2.26396	3.9233	High
GSM437264	3.87404	-2.48658	2.4273	Low
GSM437265	4.26165	-2.97322	2.05448	Low
GSM437266	3.40142	-2.80479	1.47069	Low
GSM437267	3.85225	-2.42366	2.5263	High
GSM437268	3.79629	-2.92694	1.68225	Low
GSM437269	3.99996	-2.54183	2.47639	High
GSM437270	4.09458	-2.41487	2.87497	High
GSM437271	4.09317	-2.76304	2.19455	Low
GSM437272	3.54464	-2.50995	1.9944	Low
GSM437273	4.14932	-3.14951	1.73567	Low
GSM437274	3.39145	-2.45401	1.90993	Low
GSM437275	3.53276	-2.8971	1.48697	Low
GSM437276	3.84172	-2.50471	2.35253	Low
GSM437277	3.71075	-2.3603	2.47165	Low
GSM437278	3.96627	-2.75777	2.06847	Low
GSM437279	3.99531	-2.48577	2.58333	High
GSM437280	3.53179	-3.38928	1.08586	Low
GSM437281	3.69977	-2.6223	1.99061	Low
GSM437282	3.92746	-2.43748	2.59622	High
GSM437283	2.96883	-2.15357	1.90043	Low
GSM437284	4.53698	-2.12223	4.57036	High
GSM437285	3.32444	-2.80257	1.4071	Low
GSM437286	3.79945	-2.20606	2.96625	High
GSM437287	4.19921	-2.5597	2.69127	High
GSM437288	4.46765	-2.28875	3.81032	High
GSM437289	4.41006	-2.68348	2.7008	High
GSM437290	4.22063	-2.78769	2.29227	Low
GSM437291	3.7439	-3.54673	1.11427	Low
GSM437292	3.91356	-2.42614	2.60203	High
GSM437293	4.38004	-2.38354	3.37685	High
GSM437294	4.72729	-2.43735	3.76173	High
GSM437295	4.08355	-2.57714	2.51072	High
GSM437296	4.10026	-2.44228	2.81858	High
GSM437297	4.34201	-2.20503	3.87751	High
GSM437298	3.34703	-2.89941	1.3326	Low
GSM437299	3.57591	-2.89812	1.52244	Low
GSM437300	3.86461	-3.358	1.32449	Low
GSM437301	4.63427	-2.69839	2.94953	High
GSM437302	4.26849	-2.45736	3.01725	High
GSM437303	4.52642	-1.9209	5.55268	High
GSM437304	3.81248	-2.10005	3.29574	High
GSM437305	3.59832	-2.82087	1.62717	Low
GSM437306	4.41325	-2.04949	4.63686	High
GSM437307	4.63988	-2.62697	3.11962	High
GSM437308	4.34877	-2.0114	4.67451	High
GSM437309	3.92455	-3.13326	1.56888	Low
GSM437310	4.06905	-2.78789	2.13027	Low
GSM437311	4.00062	-2.52129	2.51773	High
GSM437312	4.10352	-2.68664	2.3329	Low
GSM437313	4.18647	-2.18279	3.67852	High
GSM437314	4.66622	-2.26957	4.22711	High
GSM437315	5.20175	-2.4598	4.47197	High
GSM437316	4.31919	-2.31567	3.47899	High
GSM437317	4.84849	-2.37989	4.15048	High
GSM437318	4.59682	-2.86468	2.57492	High
GSM437319	4.96715	-2.53837	3.82917	High
GSM437320	4.26964	-2.42038	3.11182	High
GSM437321	3.82471	-2.20657	3.00442	High
