# Supplementary material for: The Stroma Liquid Biopsy Panel Contains a Stromal-Epithelial Gene Signature Ratio That Is Associated with the Histologic Tumor-Stroma Ratio and Predicts Survival in Colon Cancer
Source: Cancers (Basel). 2021 Dec 29;14(1):163. doi: 10.3390/cancers14010163 (PMC8750571; doi:10.3390/cancers14010163)
Supplement: Supplementary file 1 [file cancers-14-00163-s001.zip › SupplementaryData2_signature_construction.xlsx]

## Sheet: Stromal_gene_expression
Supplementary Data 2
Stromal gene set expression values in transcripts per million (TPM) of 5,520 cells derived from colorectal tumors as reported by Zhang et al. Cell. 2020;181(2):442-59 e29.
Cell_population	C3	C4BPA	CFB	CFP	CHGA	ECM1	PF4	PPBP	SAA2	SERPINA1	SERPIND1	THBS1	TIMP1
B cell	0	0	0	0	0	0	0	0	0	0	0	2.92478	8.7579
B cell	0	0	0	0	0	0	0	0	2.14073	0	0	2.69317	0
B cell	0	0	0	0	0	0	0	0	0	0	0	0	0
B cell	0	0	0	0	0	0	0	0	0	0	0	8.59353	7.03833
B cell	0	0	0	0	0	0	0	0	0	0	0	3.32	5.0463
B cell	0	0	0	0	0	0	0	6.22054	0	0	0	0	3.9564
B cell	0	0	0	0	0	0	2.64112	4.4828	0	0	0	2.29007	9.07396
B cell	0	0	0	0	0	0	0	0	0	0	0	0	8.41646
B cell	0	0	0	3.7956	0	0	0	0	1.7247	0	0	2.72849	0
B cell	0	0	0	0	0	0	0	0	0	0	0	0	10.0016
B cell	0	0	0	0	0	0	0	0	0	0	0	0	0
B cell	0	0	0	0	0	0	0	0	0	0	0	0	4.11003
B cell	0	0	0	0	0	0	0	0	0	0	0	0	4.6179
B cell	0	0	0	0	0	0	0	0	0	0	0	3.06677	0
B cell	0	0	0	0	0	0	0	0	0	0	0	0	0
B cell	5.63435	0	0	0	0	0	0	0	0	0	0	0	0
B cell	0	0	0	0	0	0	0	0	0	0	0	0	0
B cell	0	0	0	0	0	0	0	0	0	0	0	0	0
B cell	0	0	0	0	0	0	0	0	0	0	0	0	0
B cell	0	0	0	0	0	0	0	0	0	4.85941	0	2.59196	0
B cell	0	0	0	0	0	0	0	0	0	5.64874	0	0	7.06799
B cell	0	0	0	0	0	0	0	0	0	0	0	0	0
B cell	0	0	0	0	0	0	0	0	0	0	0	0	8.45998
B cell	0	0	0	0	0	0	0	0	0	0	0	7.92085	9.47617
B cell	0	0	0	0	0	0	0	0	0	4.62	0	0	6.82107
B cell	0	0	0	0	0	0	0	0	0	0	0	0	10.0323
B cell	0	0	0	0	0	0	0	0	0	0	0	0	0
B cell	0	0	0	0	0	0	0	0	0	0	0	0	6.84161
B cell	0	0	0	0	0	0	0	0	0	0	0	0	0
B cell	0	0	0	0	0	0	0	0	0	0	0	1.11652	0
B cell	0	0	0	0	0	0	0	0	0	0	0	2.655	10.6112
B cell	0	0	0	0	0	0	0	0	0	0	0	0	0
B cell	0	0	0	0	0	0	0	0	0	0	0	0	0
B cell	5.61561	0	0	0	0	0	0	0	0	0	0	0	7.77451
B cell	0	0	0	0	0	0	0	0	0	0	2.33067	2.05434	7.42989
B cell	0	0	0	0	0	0	0	0	0	0	0	2.05872	0
B cell	4.68143	0	0	2.94344	0	0	0	0	0	6.46248	0	0	0
B cell	4.27444	0	0	0	0	0	0	0	2.91232	0	0	0	5.97494
B cell	0	0	0	0	0	0	0	0	0	0	0	1.64678	0
B cell	4.72576	0	0	0	0	0	0	0	0	0	0	0	0
B cell	0	0	0	0	0	0	0	0	2.8775	0	0	1.74251	0
B cell	0	0	0	0	0	0	0	0	0	0	0	0	0
B cell	0	0	0	0	0	0	0	0	0	0	0	1.64962	0
B cell	0	0	0	0	0	0	0	0	0	0	0	0	0
B cell	3.11475	0	0	2.20126	0	0	0	0	0	0	0	0	0
B cell	0	0	0	0	0	0	4.32013	0	0	0	0	2.22203	0
B cell	0	0	0	0	0	0	0	0	0	0	0	0	0
B cell	3.22254	0	0	0	0	0	0	0	0	0	0	2.41496	5.8375
B cell	0	0	0	0	0	0	0	0	0	0	0	1.75807	0
B cell	0	0	0	0	0	0	0	0	0	0	0	0	0
B cell	1.93113	0	0	0.931867	0	0	0	0	0	0	0	1.02011	11.9759
B cell	0	0	0	4.9069	0	0	0	0	0	0	0	0	0
B cell	2.56335	0	0	0	0	0	0	0	0	0	0	0	0
B cell	0	0	0	0	0	0	0	0	0	0	0	2.668	0
B cell	0	0	0	0	0	0	0	0	0	0	0	7.21135	0
B cell	3.42915	0	0	0	0	0	0	0	0	0	0	0	0
B cell	0	0	0	0	0	0	0	0	0	4.15373	0	0	0
B cell	0	0	0	0	0	0.67595	0	0	0	0	0	0	0
B cell	0	0	0	0	0	0	0	0	0	0	0	1.59947	12.2358
B cell	0	0	0	0	0	0	0	0	0	0	0	0	0
B cell	0	0	0	0	0	0	0	0	0	0	0	0	0
B cell	0	0	0	2.05099	0	0	0	0	0	0	0	0	0
B cell	0	0	0	0	0	0.250899	0	0	0	0	0	5.41585	7.81
B cell	0	0	0	0	0	0	0	0	0	5.21637	0	0	7.94739
B cell	0	0	0	0	0	0	0	0	0	0	0	0	5.62604
B cell	0	0	0	0	0	0	0	0	0	0	0	0	5.33492
B cell	0	0	5.43825	0	0	0	0	0	0	0	0	2.38367	5.64709
B cell	0	0	0	0	0	0	0	0	0	0	0	2.56712	0
B cell	7.60702	0	0	0	0	0	0	0	0	0	0	0	0
B cell	0	0	0	1.86118	0	0	0	0	0	0	6.32953	1.99337	0
B cell	0	0	0	0	0	0	0	0	0	0	0	0	0
B cell	4.91099	0	0	0	0	0	0	0	3.63201	0	0	0	0
B cell	0	0	0	0	0	0	0	0	0	0	0	0	0
B cell	4.82219	0	0	0	0	0	0	0	0	0	0	0	0
B cell	0	0	0	0	0	0	0	0	0	0	0	0	0
B cell	0	0	0	0	0	0	0	0	0	0	0	0	0
B cell	5.13194	0	0	2.57415	0	0	0	0	0	0	0	0	0
B cell	0	0	0	0	0	0	0	0	0	0	0	3.81531	0
B cell	3.29411	0	0	0	0	0	0	0	0	0	0	0	0
B cell	0	3.43288	0	0	0	0	0	0	0	0	0	1.49745	0
B cell	2.99113	0	0	0	0	1.60884	0	0	0	0	0	0	0
B cell	0	0	0	3.2417	0	0	0	0	0	0	0	1.37578	0
B cell	0	3.87289	0	0	0	0	0	0	2.87086	0	0	2.11639	0
B cell	0	0	0	0	0	0	0	0	0	0	0	0	0
B cell	0	0	0	0	0	0	0	0	0	0	0	0	6.27295
B cell	4.3384	0	0	0	0	0	0	0	0	0	0	0	0
B cell	0	0	0	0	0	0	0	0	0	0	0	0	11.2353
B cell	0	0	0	1.92653	0	0	0	0	0	0	0	2.05878	0
B cell	5.70127	0	0	0	0	0	0	0	0	0	0	0	0
B cell	2.86032	0	0	0	0	0	0	0	0	0	0	3.78852	0
B cell	0	0	0	0	0	0	0	0	0	0	0	9.48676	0
B cell	0	0	0	0	0	0	0	0	0	0	0	2.62415	0
B cell	0	0	0	0	0	0	0	0	2.55568	0	0	0	0
B cell	0	0	0	0	0	0	0	0	0	0	0	1.65967	0
B cell	0	0	0	0	0	0	0	0	0	0	0	0	0
B cell	3.04047	1.53947	0	0	0	0	0	0	0	0	0	0	0
B cell	0	0	0	0	0	0	0	0	0	0	0	0	0
B cell	0	0	0	0	0	0	0	0	0	0	0	0	0
B cell	0	0	5.49424	2.36311	0	0	0	0	0	0	0	0	0
B cell	0	0	0	0	0	0	0	0	0	0	0	0	7.79353
B cell	0	0	0	2.53646	0	0	0	0	0	3.71372	0	0	4.4362
B cell	0	0	5.20917	0	0	0	0	0	0	0	0	1.48723	5.53373
B cell	0	0	0	0	0	0	0	0	0	0	0	8.46292	0
B cell	0	0	0	0	0	0	0	0	0	3.77236	1.74453	0	0
B cell	0	0	0	0	0	0	0	0	0	0	0	4.32268	0
B cell	0	0	0	2.32216	0	0	0	0	0	0	0	2.46928	0
B cell	0	0	0	2.17875	0	0	0	0	0	0	0	0	0
B cell	0	0	0	1.72457	0	0	0	0	0	0	0	1.85259	0
B cell	3.50587	0	0	2.93193	0	0	0	0	0	0	0	3.08491	0
B cell	0	0	0	0	0	0	0	0	0	0	0	1.77003	0
B cell	0	0	0	2.20784	0	0	0	0	0	0	0	0	10.1181
B cell	0	0	7.40344	0	0	0	0	0	0	1.83481	0	0	9.60676
B cell	0	0	0	0	0	0	0	0	0	2.40089	0	0	9.5961
B cell	0	0	2.47934	0	0	0	0	0	0	2.91299	0	0	2.71189
B cell	0	0	0	0	0	0	0	0	0	2.44278	0	0	0
B cell	0	0	0	0	0	0	0	0	0	0	0	0	6.62153
B cell	4.92823	0	0	0	0	0	0	0	0	0	0	0	6.64137
B cell	1.91068	0	0	0	0	0	0	0	0	0	0	0	0
B cell	0	0	0	0	0	0	0	0	0	0	0	0	0
B cell	0	0	0	0	0	0	0	0	0	2.88642	0	0	0
B cell	0	0	0	0	0	0	0	0	0	2.63592	0	0.701945	0
B cell	0	0	0	0	0	0	0	0	0	0	0	2.10909	0
B cell	0	0	0	0	0	0	0	0	0	0	0	1.65893	0
B cell	0	0	0	0	0	0	0	0	0	0	0	0	5.0127
B cell	2.89397	0	0	0	0	0	0	0	0	0	0	0.549925	0
B cell	0	0	0	0.56458	0	0	0	0	0	0	0	6.28908	4.10246
B cell	0	0	0	0	0	0	0	0	0	0	0	0	3.79193
B cell	4.89548	0	0	0	0	0	0	0	0	0	0	0	10.0518
B cell	0	0	0	0	0	0	0	0	0	0	0	1.79916	0
B cell	0	0	0	0	0	0	0	0	0	0	0	1.35447	2.9671
B cell	0	0	0	0.862237	0	0	0	0	0	0	0	0	0
B cell	0	0	0	0	0	0	0	0	0	0	0	0	4.66939
B cell	2.64475	0	0	0	0	0	0	0	0	0	0	0	0
B cell	0	0	0	0	0	0	0	0	0	0	0	4.23764	0
B cell	0	0	0	0	0	0	0	0	0	0	0	0	8.62687
B cell	0	0	0	0	0	0	0	0	0	0	0	0	3.98167
B cell	0	0	9.08877	0	0	0	0	0	0	0	0	2.58614	0
B cell	0	0	0	0.769641	0	0	0	0	0	0	0	1.21804	0
B cell	0	0	0	0	0	0	0	0	0	0	0	0	0
B cell	0	0	0	0	0	0	0	0	0	0	0	0	0
B cell	0	0	0	0	0	0	0	0	0	0	0	0	10.7003
B cell	0	0	0	0	0	0	0	0	0	0	0	0.948481	0
B cell	0	0	0	0	0	0	0	0	0	0	0	0	0
B cell	0	0	0	0	0	0	0	0	0	0	0	0	8.55491
B cell	0	0	0	0	0	0	0	0	0	0	0	1.23352	9.76669
B cell	0	0	0	0	0	2.1989	0	0	0	0	0	0	0
B cell	0	0	0	0	0	0	0	0	0	4.79912	0	7.16829	0
B cell	0	0	0	0	0	0	0	0	0	0	0	0	10.0639
B cell	0	0	0	0	0	0	0	0	0	0	0	0	9.77403
B cell	0	0	0	0	0	0	0	0	0	0	0	0	0
B cell	0	0	0	0	0	0	0	0	0	0	0	5.93855	7.89398
B cell	0	0	0	0	0	0	0	0	0	0	0	0	10.4807
B cell	0	0	0	0	0	0	0	0	0	0	0	1.94832	0
B cell	0	0	0	0	0	0	0	0	0	0	0	4.85134	10.5508
B cell	4.54773	0	0	0	0	0	0	0	0	0	0	0	0
B cell	4.16658	0	0	0	0	0	0	0	0	0	0	8.9183	10.3409
B cell	5.67546	0	0	0	0	0	0	0	0	0	0	6.671	8.61618
B cell	0	0	0	0	0	0	0	0	0	0	0	0	4.53935
B cell	0	0	0	0	0	0	0	0	0	0	0	0	4.1689
B cell	0	0	0	0	0	6.39127	0	0	0	0	0	0	0
B cell	0	0	0	0	0	0	0	0	0	0	0	0	3.73588
B cell	0	0	0	0.756886	0	0	0	0	0	0	0	0	0
B cell	0	0	0	7.03488	0	0	0	0	0	2.68942	0	0	2.73018
B cell	0	0	0	0	0	0	0	0	0	0	0	1.88578	7.63011
B cell	0	0	0	5.40188	0	0	0	0	0	0	0	0	4.99767
B cell	0	0	0	0	0	0	0	0	0	0	0	0.938395	0
B cell	0	0	0	0	0	0	0	0	0	0	0	2.12898	4.85788
B cell	0	0	0	0	0	4.44535	0	0	0	0	0	2.23451	4.16032
B cell	0	0	0	0	0	0	0	0	0	0	0	0	0
B cell	0	0	0	0.212747	0	0	0	0	0	0	0	0	9.03187
B cell	1.37143	0	0	0	0	0	0	0	0	0	0	1.53498	10.6922
B cell	0	0	0	0	0	0	0	0	0	0	0	1.87324	8.62594
B cell	5.39408	0	0	0	0	0	0	0	0	0	0	0	8.50524
B cell	0	0	0	0	0	0	0	0	0	0	0	1.66182	0
B cell	4.07629	0	6.14838	0	0	0	0	0	0	0	0	8.09552	11.4481
B cell	0	0	0	0	0	0	0	0	0	0	0	0	0
B cell	3.03386	0	0	0	0	0	0	0	0	0	0	0.81236	3.35579
B cell	0	0	0	0	0	0	0	0	0	0	0	1.89696	4.59096
B cell	0	0	0	0	0	0	0	0	0	0	0	0	5.81163
B cell	0	0	0	0.570272	0	0	0	0	0	0	0	1.49817	0
B cell	0	0	0	0	0	0	0	0	0	0	0	6.27766	4.0553
B cell	2.3427	0	0	0	0	0	0	0	0	0	0	0.952048	10.0926
B cell	1.56736	0	0	2.92748	0	0	0	0	0	0	0	1.69721	0
B cell	0	0	0	0	11.1601	0	0	0	0	0	0	1.54758	7.2133
B cell	0	0	0	0	0	0	0	0	0	2.7877	0	0	9.17726
B cell	5.13026	0	0	0	0	0	0	0	0	1.86808	0	0	2.00198
B cell	1.61986	0	0	3.46859	0	0	0	0	0	0	0	1.91452	5.92322
B cell	0	0	0	0	0	0	0	0	0	0	0	2.55199	2.64744
B cell	0	0	0	0	0	0	0	0	0	0	0	2.82858	2.80525
B cell	0	0	0	0	0	0	0	0	0	1.1819	0	0	6.99916
B cell	0	0	6.33687	0	0	0	0	0	0	1.36518	0	0	0
B cell	0	0	0	0	0	0	0	0	0	0	0	0	8.23106
B cell	0	0	0	0	0	0	0	0	0	0	0	0	6.45727
B cell	0	0	5.46398	0	12.7803	0	0	0	0	0.704617	0	0	7.17397
B cell	0	0	0	0	0	0	0	0	0	0	0	2.51492	3.26911
B cell	0	0	0	0	0	0	0	0	0	0	0	0	0
B cell	0	0	0	0	0	0	0	0	0	0	0	0	0
B cell	0	0	0	0	0	0	0	0	3.09605	0	0	0	0
B cell	5.14551	0	0	0	0	0	0	0	0	0	0	2.25113	8.57656
B cell	0	0	0	0	0	0	0	0	0	0	0	0	0
B cell	0.770744	0	0	0	0	0	0	0	0	0	0	0	0
B cell	0	0	0	2.615	0	0	0	0	0	0	0	0	0
B cell	0	0	0	0	0	0	0	0	0	0	0	0	0
B cell	0	0	3.12348	0	0	0	0	0	0	0	0	0	0
B cell	5.09143	0	0	0	0	0	0	0	0	0	0	0	0
B cell	0	0	0	0	0	0	0	0	0	0	0	0	0
B cell	0	0	0	0	0	0	0	0	0	0	0	0	4.86688
B cell	0	0	0	0	0	0	0	0	0	0	0	0	0
B cell	3.78858	0	0	0	0	0	0	0	0	0	0	2.43813	0
B cell	0	0	0	0	0	0	0	0	0	0	0	2.05029	0
B cell	0	0	0	0	0	0	0	0	0	0	0	0	0
B cell	0	0	0	0	0	0	0	0	0	0	0	2.23982	0
B cell	0	0	0	0	0	0	0	0	0	0	0	1.80707	0
B cell	0	0	0	0	0	0	0	0	0	0	0	0	0
B cell	0	0	7.71856	0	0	0	0	0	0	0	0	3.45526	0
B cell	0	0	0	0	0	0	0	0	0	0	0	0	0
B cell	0	0	0	0	0	0	0	0	0	0	0	3.72315	0
B cell	0	0	0	0	0	0	0	0	0	0	0	0	0
B cell	0	0	0	0	0	0	0	0	0	0	0	4.47978	0
B cell	4.84265	0	0	0	0	0	0	0	0	0	0	0	0
B cell	0	0	0	0	0	0	0	0	0	0	0	0	0
B cell	0	0	0	0	0	0	0	0	1.86737	0	0	1.98998	0
B cell	0	0	0	0	0	0	0	0	0	0	0	0	0
B cell	0	0	0	0	0	0	0	0	0	0	0	0	0
B cell	0	0	0	0	0	0	0	0	0	0	0	3.75222	5.54681
B cell	0	0	0	0	0	0	0	0	2.07913	0	0	3.07047	0
B cell	0	0	0	4.19543	0	0	0	0	1.87254	0	0	2.92848	0
B cell	4.91349	0	0	0	0	0	0	0	0	0	0	3.0409	9.24443
B cell	0	0	0	0	0	0	0	0	0	0	0	0	0
B cell	3.24749	0	0	0	0	0	0	0	2.8309	0	0	0	0
B cell	0	0	0	4.28649	0	0	0	0	0	0	0	0	0
B cell	0	0	0	0	0	0	0	0	0	0	0	2.99605	0
B cell	0	0	0	2.90763	0	0	0	0	0	0	0	0	0
B cell	0	0	0	0	0	0	0	0	0	0	0	3.02212	0
B cell	0	0	0	7.16396	0	0	0	0	0	0	0	0	0
B cell	3.48555	0	0	0	0	0	0	0	0	0	0	2.11452	0
B cell	0	0	0	0	0	0	0	0	0	0	0	3.08741	0
B cell	0	0	0	0	0	0	0	0	0	0	0	2.85272	0
B cell	0	0	0	0	0	0	0	0	0	0	0	0	0
B cell	0	0	0	0	0	0	0	0	0	0	0	0	0
B cell	0	0	0	0	0	0	0	0	0	0	0	0	0
B cell	0	0	0	0	0	0	0	0	0	0	0	0	11.5446
B cell	0	0	0	0	0	0	0	0	0	0	0	0	0
B cell	0	0	0	0	0	0	0	0	0	0	0	0	0
B cell	0	0	0	1.86503	0	0	0	0	0	0	0	2.25886	0
B cell	0	0	0	0	0	0	0	0	0	0	0	2.29107	0
B cell	0	0	0	0	0	0	0	0	0	0	0	0	0
B cell	4.13773	0	0	0	0	0	0	0	0	0	0	3.62619	0
B cell	0	0	0	0	0	0	0	0	0	0	0	0	0
B cell	0	0	0	0	0	0	0	0	0	0	0	0	0
B cell	3.0703	0	0	0	0	0	0	0	0	0	0	0	0
B cell	0	0	0	0	0	0	0	0	0	0	0	0	0
B cell	0	0	0	0	0	0	0	0	0	0	0	2.95382	9.99883
B cell	0	0	0	0	0	0	0	0	0	0	0	0	0
B cell	4.02999	0	0	0	0	0	0	0	0	0	0	1.98636	0
B cell	0	0	0	0	0	0	0	0	0	0	0	0	0
B cell	0	0	0	0	0	0	0	0	0	0	0	2.32598	0
B cell	0	0	0	0	0	0	0	0	0	0	0	0	0
B cell	0	0	0	0.866063	0	0	0	0	0	0	0	1.74433	0
B cell	3.1003	0	0	0	0	0	0	0	0	0	0	2.33608	0
B cell	0	0	0	0	0	0	0	0	0	0	0	3.06657	0
B cell	0	0	0	0	0	0	0	0	0	0	0	0	0
B cell	0	0	0	0	0	0	0	0	0	0	0	0	0
B cell	0	0	0	0	0	0	0	0	0	0	0	2.52849	0
B cell	0	0	0	1.35463	0	0	0	0	0	0	0	0	0
B cell	0	0	0	1.06897	0	0	0	0	2.68987	0	0	2.05399	0
B cell	0	0	0	0	0	0	0	0	2.59729	0	0	2.71186	0
B cell	0	0	0	0	0	0	0	0	0	0	0	0	0
B cell	4.36543	0	0	0	0	0	0	0	0	0	0	2.81174	0
B cell	0	0	0	1.6163	0	0	0	0	0	4.51844	0	2.77357	0
B cell	2.78254	0	0	0	0	0	0	0	0	0.978102	0	1.07167	0.946342
B cell	0	0	0	0	0	0	0	0	0	5.07848	0	2.43266	4.29601
B cell	5.5687	0	0	0	0	0	0	0	1.81541	2.566	0	1.83245	0
B cell	0	0	0	0	0	0	0	5.8252	0	0	0	1.65723	0
B cell	1.94611	0	0	0	0	0	0	0	0	4.10303	0	1.2483	1.75838
B cell	0	0	0	0	0	0	0	0	0	0	0	1.24449	1.87231
B cell	0	0	0	0	0	0	0	0	0	5.08322	0	1.92931	0
B cell	0	0	0	0	0	0	0	0	0	2.84911	0	2.51466	4.43896
B cell	3.32649	0	0	2.69825	0	0	0	0	0	5.57043	0	3.2175	3.3777
B cell	0	0	0	0	0	0	0	0	0	0	0	0.109976	0
B cell	3.13951	0	0	0	0	0	0	0	0	0	0	0.101087	3.30931
B cell	0	0	0	0.922763	0	0	0	0	0	0	0	0.0808608	0
B cell	0	0	0	2.06136	0	0	0	0	0	0	0	0	0
B cell	0	0	0	7.2787	0	0	0	0	0	0	0	0.170245	0
B cell	0	0	0	2.61385	0	0	0	0	0	0	0	0.129	0
B cell	0	0	0	0	0	0	0	0	0	0	5.70321	0	2.94611
B cell	1.48861	0	0	0.424201	0	0	0	0	0	0	0	0	0
B cell	3.16526	0	0	1.15708	0	0	0	0	0	0	0	0.373774	0
B cell	2.52701	0	0	0	0	0	0	0	0	0	0	0.353852	0
B cell	0	0	0	0.972975	0	0	0	0	0	0	0	0	0
B cell	0	0	0	0	0	0	0	0	0	6.48156	0	0	0
B cell	0	0	0	0	0	0	0	0	3.58417	0	0	0	0
B cell	0	0	0	0	0	0	0	0	0	0	0	0.0652385	0
B cell	0	0	0	0	0	0	0	0	0	0	0	0.123802	0
B cell	0	0	0	0	0	0	0	0	0	0	0	0	0
B cell	0.440944	0	0	0	0	0	0	0	0	0	0	0.144019	2.97143
B cell	3.76616	0	0	0	0	0	0	0	0	0	1.77851	0	0
B cell	0	0	0	0	0	0	0	0	0	0	0	0	9.36642
B cell	0	0	0	0	0	0	0	0	0	0	0	0	0
B cell	0	0	0	0	0	0	0	0	0	0	0	0.11312	0
B cell	5.49037	0	0	0	0	0	0	0	0	0	0	0	0
B cell	5.90807	0	0	0.985565	0	0	0	0	0	5.39788	0	0.249175	3.1466
B cell	3.86713	0	0	4.70462	0	0	0	0	0	0	0	0.849623	9.50075
B cell	0	0	0	3.41138	0	0	0	0	0	0	0	0.100253	3.5529
B cell	0	0	0	1.20841	0	0	0	0	0	0	0	0.115287	3.92233
B cell	5.4688	0	0	0	0	0	0	0	2.69036	0	0	1.23012	0
B cell	2.49974	0	0	0	0	0	0	0	0	0	0	0	0
B cell	0	0	0	0.895686	0	0	0	0	0	0	0	0.266492	0
B cell	0	0	0	0.520215	0	0	0	0	0	0	0	0.112015	3.06228
B cell	1.74933	0	0	0.356568	0	0	0	0	0	4.41139	0	0.113464	2.71554
B cell	0	0	0	0	0	0	0	0	0	6.01532	0	4.64324	5.77084
B cell	2.21951	0	0	1.63943	0	3.9444	0	0	3.2661	3.23698	0	1.28663	3.07882
B cell	0	0	0	2.79558	0	0	0	0	0	0	0	2.0982	8.33167
B cell	2.40461	0	0	1.8532	0	0	0	0	0	0	0	0.151477	4.27347
B cell	0.478263	0	4.23404	3.22585	0	0	0	0	0	0	0	1.7096	4.42401
B cell	0	0	0	0	0	0	0	0	0	0	0	0	1.68911
B cell	2.33046	0	0	1.61009	0	0	0	0	0	0	0	1.62964	4.05826
B cell	4.3434	0	0	0	0	0	6.38138	0	0	4.82764	0	3.3044	4.60431
B cell	0	0	5.92386	0	0	0	0	0	0	0	0	0.454162	12.3501
B cell	3.78546	0	0	0	0	4.37651	0	0	0	0	0	1.53115	3.4816
B cell	3.40929	0	0	0.769439	0	0	0	0	0	0	0	0.232744	5.34055
B cell	2.77907	0	4.72342	5.11097	0	0	0	0	0	0	0	3.40848	0
B cell	2.37423	0	0	0	0	0	0	0	0	0	0	0	4.3241
B cell	5.42079	0	0	0	0	0	0	0	0	0	0	1.40299	3.45012
B cell	0.504034	0	0	0	0	0	0	0	0	0	0	1.80202	7.68292
B cell	4.69922	0	0	0	0	0	0	0	0	0	0	0.151602	9.69164
B cell	0	0	0	0	0	0	0	0	0	0	0	3.78682	5.14439
B cell	0	0	0	0	0	0	0	0	0	0	0	1.79017	3.74204
B cell	0	0	0	0	0	0	0	0	0	3.68257	0	1.90757	9.77728
B cell	0	0	0	0	0	0	0	0	0	5.22848	0	2.21833	3.0782
B cell	0	0	0	0	0	0	0	0	0	0	0	0.917451	5.22681
B cell	2.77901	0	0	0	0	0	0	0	0	0	0	0.52505	0
B cell	4.08186	0	0	0	0	0	0	0	0	3.08027	0	0.220549	0
B cell	0	0	0	1.64922	0	0	0	0	0	0	0	0.270143	2.83908
B cell	0.63815	0	4.08089	0	0	0	0	0	2.22628	0	0	0.291541	2.11162
B cell	3.95882	0	0	0	0	0	0	0	0	6.21122	0	0.345138	0
B cell	0	0	0	1.22869	0	0	0	0	0	0	0	0.330564	3.84785
B cell	2.5468	0	0	0	0	0	0	0	0	3.84239	0	0.0979947	9.79658
B cell	1.25443	0	5.95901	0	0	0	0	0	0	0	0	0.148314	11.3641
B cell	0.406221	0	0	0	0	0	0	0	0	0	0	1.5676	3.70146
B cell	3.28512	0	0	0	0	2.53774	0	0	0	0	0	0.0933024	2.55333
B cell	0	0	0	0	0	0	0	0	0	0	0	0.398688	8.69046
CD4 T cell	0.938136	0	0	0	0	0	0	0	0	0	0	0	8.42086
CD4 T cell	0	0	0	0	0	0	0	0	0	0	0	0.794731	3.14523
CD4 T cell	0	4.98515	0	0	0	0	0	0	0	0	0	0	0
CD4 T cell	0	0	0	1.62848	0	0	0	0	0	0	0	0.96166	0
CD4 T cell	0	0	0	0	0	0	0	0	0	0	0	4.52015	5.79563
CD4 T cell	0	0	0	0	0	0	0	0	0	0	0	0	0
CD4 T cell	3.71864	0	0	0	0	0	0	0	0	0	0	6.29688	0
CD4 T cell	0	0	0	0	0	0	0	0	0	0	0	0	0
CD4 T cell	0	0	0	0	0	0	0	0	0	0	0	0	0
CD4 T cell	0	0	0	0	0	0	0	0	0	0	0	0.664769	0
CD4 T cell	5.389	0	0	0	0	0	0	0	0	0	0	0	10.5871
CD4 T cell	0	0	0	5.74856	0	0	0	0	0	0	0	0	0
CD4 T cell	0	0	0	0	0	0	0	0	0	0	0	2.34392	0
CD4 T cell	0	0	0	1.32359	0	0	0	0	0	0	0	0.74848	0
CD4 T cell	0	0	0	0	0	0	0	0	0	0	0	0	3.12886
CD4 T cell	0	0	0	0	0	0	0	0	0	0	0	0	0
CD4 T cell	0	0	0	0	0	0	0	0	0	0	0	0	0
CD4 T cell	0	0	0	0	0	0	0	0	0	0	0	0	0
CD4 T cell	0	0	0	1.71776	0	0	0	0	0	0	0	0.602141	0
CD4 T cell	0	0	0	8.70003	0	0	0	1.24151	0	0	0	9.58708	0
CD4 T cell	0	0	0	0	0	0	0	0	0	0	0	0	0
CD4 T cell	0	0	0	0	0	0	0	0	0	0	0	0	0
CD4 T cell	0	0	0	0	0	0	0	0	0	0	0	8.96531	0
CD4 T cell	0	0	0	1.55343	0	0	0	0	0	0	0	6.39292	8.47724
CD4 T cell	0	0	0	0	0	0	0	0	0	0	0	0	0
CD4 T cell	0	0	0	0	0	0	0	0	0	0	0	0.55695	9.9131
CD4 T cell	0	0	0	0	0	0	0	0	0	0	0	0.64979	0
CD4 T cell	0	0	0	0	0	0	0	0	0	0	0	0	10.2439
CD4 T cell	0	0	0	0	0	0	0	0	0	0	0	0	0
CD4 T cell	0	0	0	1.18148	0	0	0	0	0	0	0	0	0
CD4 T cell	0	0	0	0	0	0	0	0	0	0	0	0	0
CD4 T cell	0	0	0	0	0	0	0	0	0	0	0	1.03037	0
CD4 T cell	0	0	0	0	0	0	0	0	0	0	0	9.21638	10.8551
CD4 T cell	0	0	0	0.894099	0	0	0	0	0	0	0	0	0
CD4 T cell	0	0	0	0	0	0	0	0	0	0	0	0	9.88323
CD4 T cell	0	0	0	0	0	0	0	0	0	0	0	0	0
CD4 T cell	0	0	0	2.78567	0	0	0	0	0	0	0	0	0
CD4 T cell	0	0	0	0	0	0	0	0	0	0	0	0.520609	0
CD4 T cell	0	0	0	0	0	0	0	0	0	0	0	0	0
CD4 T cell	0	0	0	0	0	0	0	0	0	0	0	0	0
CD4 T cell	0	0	0	0	0	0	0	0	0	0	1.96172	0	0
CD4 T cell	0	0	0	0	0	0	0	0	0	0	0	0	10.1099
CD4 T cell	0	0	0	0	0	0	0	0	0	0	0	0	0
CD4 T cell	0	0	0	0	0	0	0	0	0	0	0	0	0
CD4 T cell	0	5.16562	0	0	0	0	0	0	0	0	0	0	0
CD4 T cell	0	0	0	0	0	0	0	0	0	0	0	1.19196	0
CD4 T cell	0	0	0	0	0	0	0	0	0	0	0	0	0
CD4 T cell	0	0	0	0	0	0	0	0	0	0	0	0.538152	0
CD4 T cell	0	0	0	0	0	0	0	0	0	0	0	0	0
CD4 T cell	3.67954	0	0	0	0	0	0	0	0	0	0	0	0
CD4 T cell	8.15673	0	0	0	0	0	0	0	0	0	0	0	0
CD4 T cell	0	0	0	0	0	0	0	0	0	0	0	3.18295	0
CD4 T cell	0	0	0	0	0	0	0	0	0	0	0	0.417655	3.92304
CD4 T cell	0	0	0	0	0	0	0	0	0	0	0	0.447128	0
CD4 T cell	0	0	0	0	0	0	0	0	2.83789	0	0	2.23545	0
CD4 T cell	6.05454	0	0	0	0	0	0	1.25733	0	0	0	0	0
CD4 T cell	0	0	0	3.42269	0	0	0	0	0	0	0	0.484625	0
CD4 T cell	0	0	0	0.957123	0	0	0	0	0	0	0	5.20193	8.31571
CD4 T cell	0	0	0	1.62617	0	0	0	0	0	0	0	0	0
CD4 T cell	0	0	0	0	0	0	0	0	0	0	0	1.17453	0
CD4 T cell	0	0	0	0	0	0	0	0	0	0	0	0	0
CD4 T cell	0	0	0	0	0	0	0	0	0	0	0	0	8.78447
CD4 T cell	0	0	0	0	0	0	0	0	0	0	0	0	0
CD4 T cell	0	0	0	0	0	0	0	0	0	0	0	0	0
CD4 T cell	0	0	0	0	0	0	0	0	0	0	0	0	9.01506
CD4 T cell	0	0	0	0	0	0	0	0	0	0	0	0.490872	0
CD4 T cell	0	0	0	0	0	0	0	0	0	0	0	0.453214	0
CD4 T cell	0	0	0	0	0	0	0	0	0	0	0	0.817592	0
CD4 T cell	0	0	0	0	0	0	0	0	0	0	0	0	9.05904
CD4 T cell	0	0	0	0	0	0	0	0	0	0	0	0	0
CD4 T cell	0	0	0	0	0	0	0	0	0	0	0	4.66684	0
CD4 T cell	0	0	0	0	0	0	0	0	0	0	0	0.64664	0
CD4 T cell	0	0	0	0	0	0	0	0	0	0	0	0.466186	0
CD4 T cell	0	0	0	0	0	0	0	0	0	0	0	0.415593	0
CD4 T cell	0	0	0	0	0	0	0	0	0	0	0	0.345746	8.67982
CD4 T cell	0	0	0	0	0	0	0	0	2.34761	0	0	3.63346	0
CD4 T cell	0	0	0	0	0	0	0	0	0	0	0	0	0
CD4 T cell	6.3822	0	0	0	0	0	0	0	0	0	0	0.426977	0
CD4 T cell	0	6.55436	0	0	0	0	0	0	0	0	0	0	0
CD4 T cell	0	0	0	0	0	0	0	0	0	0	0	0	0
CD4 T cell	0	0	0	4.75961	0	0	0	0	0	0	0	0	0
CD4 T cell	0	0	0	0	0	0	0	0	0	0	0	0.93458	0
CD4 T cell	5.76471	0	0	0	0	0	0	0	0	0	0	0.482008	0
CD4 T cell	0	0	0	0	0	0	0	0	0	0	0	0	0
CD4 T cell	0	0	0	0	0	0	0	0	0	0	0	0.419679	8.67401
CD4 T cell	0	0	0	1.5684	0	0	0	0	0	0	0	4.98913	8.57306
CD4 T cell	0	0	0	0	0	0	0	0	0	0	0	0	0
CD4 T cell	4.71517	0	0	0	0	0	0	0	0	0	0	1.94408	0
CD4 T cell	7.02863	0	0	1.95486	0	0	0	0	0	0	0	0	0
CD4 T cell	0	0	0	1.00911	0	0	0	0	0	0	0	0	0
CD4 T cell	0	0	0	0	0	0	0	0	0	0	0	0.476768	0
CD4 T cell	0	0	0	0.762913	0	0	0	0	0	0	0	0.703208	0
CD4 T cell	3.70459	0	0	0	0	0	0	0	0	0	0	0.435854	0
CD4 T cell	3.40567	0	7.63728	0	0	0	0	0	0	0	0	0.335565	0
CD4 T cell	0	0	0	0	0	0	0	0	0	0	0	0.41278	0
CD4 T cell	0	0	0	0	0	0	0	0	0	0	0	0	0
CD4 T cell	0	0	0	0	0	0	0	0	0	0	0	0	0
CD4 T cell	0	0	0	0	0	0	0	0	0	0	0	0	0
CD4 T cell	0	0	0	0	0	0	0	0	0	0	0	0	0
CD4 T cell	0	0	0	0	0	0	0	0	0	0	0	9.16658	8.38209
CD4 T cell	0	0	0	0	0	0	0	0	0	0	0	0.760831	0
CD4 T cell	0	0	0	0	0	0	0	0	0	0	0	0	8.29851
CD4 T cell	0	0	0	0	0	0	0	0	0	0	0	0.406758	0
CD4 T cell	0	0	0	0	0	0	0	0	0	0	0	0	0
CD4 T cell	0	0	0	1.23696	0	0	0	0	0	0	0	0.505547	0
CD4 T cell	0	6.02152	0	0	0	0	0	0	0	0	0	0.821872	0
CD4 T cell	0	0	0	0	0	0	0	0	0	0	0	1.50921	8.39898
CD4 T cell	0	0	0	0	0	0	0	0	0	0	0	0	0
CD4 T cell	0	0	0	0	0	0	0	0	0	0	0	0	0
CD4 T cell	0	0	0	1.54203	0	0	0	0	0	0	0	0	0
CD4 T cell	0	0	0	0	0	0	0	0	0	0	0	0	0
CD4 T cell	0	0	0	0	0	0	0	0	0	0	0	6.91594	0
CD4 T cell	6.19786	0	0	0	0	0	0	0	0	0	0	0	0
CD4 T cell	0	0	0	8.9802	0	0	0	0	0	0	0	0	0
CD4 T cell	0	0	0	8.47299	0	0	0	0	0	0	0	7.27135	10.3135
CD4 T cell	5.32513	0	0	0	0	0	0	0	0	0	0	0	0
CD4 T cell	0	0	0	0	0	0	0	0	0	0	0	0	0
CD4 T cell	0	0	0	0	0	0	0	0	0	0	0	0	0
CD4 T cell	0	0	0	0	0	0	0	0	0	0	0	0.452404	0
CD4 T cell	0	0	0	0	0	0	0	0	0	0	0	0	0
CD4 T cell	0	0	0	0	0	0	0	0	0	0	0	0	0
CD4 T cell	0	0	0	0	0	0	0	0	0	0	0	0.720973	3.05791
CD4 T cell	5.00606	0	0	1.22909	0	0	0	0	1.65278	0	0	0	0
CD4 T cell	0	0	0	0	0	0	0	0	0	0	0	0.754266	0
CD4 T cell	0	0	0	0.790835	0	0	0	0	0	0	0	0.905308	0
CD4 T cell	3.56824	0	0	0	0	0	0	0	0	0	0	0	0
CD4 T cell	0	0	0	0	0	0	0	0	0	0	0	0.915529	0
CD4 T cell	0	0	0	0	0	0	0	0	0	0	0	0	8.29436
CD4 T cell	0	0	0	0	0	0	0	0	0	0	0	1.1902	0
CD4 T cell	0	0	0	0	0	0	0	0	0	0	0	0	0
CD4 T cell	0	0	0	0	0	0	0	0	0	0	0	0	0
CD4 T cell	0	0	0	0	0	0	0	0	0	0	0	0	0
CD4 T cell	0	0	0	0	0	0	0	0	0	0	0	0.630357	0
CD4 T cell	0	0	0	0	0	0	0	0	0	0	0	0	0
CD4 T cell	0	0	0	0	0	0	0	0	0	0	0	1.22117	0
CD4 T cell	0	0	0	1.60479	0	0	0	0	0	0	0	0	0
CD4 T cell	5.94791	0	0	0	0	0	0	0	0	0	0	0	0
CD4 T cell	0	0	0	0	0	0	0	0	0	0	0	0	0
CD4 T cell	0	0	0	0	0	0	0	0	0	0	0	0	0
CD4 T cell	0	0	0	3.15612	0	0	0	0	0	0	0	0.657967	8.67093
CD4 T cell	0	0	0	0	0	0	0	0	0	0	0	0.436373	0
CD4 T cell	0	0	0	0	0	0	0	0	0	0	0	0	9.90579
CD4 T cell	0	0	0	0	0	0	0	0	0	0	0	0	0
CD4 T cell	0	0	0	0	0	0	0	0	0	0	0	0	0
CD4 T cell	3.63612	0	0	0	0	0	0	0	0	0	0	0	8.06524
CD4 T cell	0	0	0	0	0	0	0	0	0	0	0	0	0
CD4 T cell	5.82191	0	0	2.9774	0	0	0	0	0	0	0	0.63228	0
CD4 T cell	0	0	0	0	0	0	0	0	0	0	0	0.760128	0
CD4 T cell	0	0	0	0	0	0	0	0	0	0	0	0.48283	0
CD4 T cell	0	0	0	0	0	0	0	0	0	0	0	0	8.76184
CD4 T cell	0	0	0	0	0	0	0	0	0	0	0	0	0
CD4 T cell	0	0	0	0	0	0	0	0	0	0	0	9.40084	0
CD4 T cell	0	0	0	2.31806	0	0	0	0	0	0	0	0	0
CD4 T cell	0	0	0	7.49831	0	0	0	0	3.78823	0	0	0	8.77662
CD4 T cell	0	0	0	0	0	0	0	0	0	0	0	1.50579	0
CD4 T cell	0	0	0	0	0	0	0	0	0	0	0	0	8.90173
CD4 T cell	0	0	0	0	0	0	0	0	0	0	0	0	9.44023
CD4 T cell	0	0	0	0	0	0	0	0	0	0	0	0	7.62917
CD4 T cell	0	0	0	0	0	0	0	0	0	0	0	0	3.66773
CD4 T cell	0	0	0	0	0	0	0	0	0	0	0	0	0
CD4 T cell	0	0	0	0	0	0	0	0	0	0	0	0	0
CD4 T cell	0	0	0	0	0	0	0	0	0	0	0	0	0
CD4 T cell	0	0	0	0	0	0	0	0	0	0	0	0	9.26309
CD4 T cell	4.27796	0	0	0	0	0	0	0	0	0	0	6.49718	0
CD4 T cell	0	0	0	0	0	0	0	0	0	0	0	0	0
CD4 T cell	0	0	0	0	0	0	0	0	0	0	0	0	0
CD4 T cell	0	0	0	0	0	0	0	0	0	0	0	0	9.49477
CD4 T cell	0	0	0	0	0	0	0	0	0	0	0	0	0
CD4 T cell	3.59268	0	0	0	0	0	0	0	0	0	0	0	0
CD4 T cell	3.23968	0	0	1.76226	0	0	0	0	0	0	0	0	0
CD4 T cell	0	0	0	2.50001	0	0	0	0	0	0	0	0	9.90954
CD4 T cell	0	0	0	0	0	0	0	0	0	0	0	0.485184	8.99835
CD4 T cell	4.7425	0	0	0	0	0	0	0	0	0	0	0	0
CD4 T cell	5.65787	0	0	0	0	0	0	0	0	0	0	1.28145	0
CD4 T cell	7.66836	0	0	0	0	0	0	0	0	0	0	0.787494	9.6489
CD4 T cell	0	0	0	0	0	0	0	0	0	0	0	0	0
CD4 T cell	0	0	0	0	0	0	0	0	2.02215	0	0	0	0
CD4 T cell	6.11483	0	0	0.7792	0	0	0	0	0	0	0	0	0
CD4 T cell	0	0	0	0	0	0	0	0	0	0	0	0.683706	7.77584
CD4 T cell	0	0	0	0	0	0	0	0	0	0	0	0	0
CD4 T cell	0	0	0	0	0	0	0	0	0	0	0	0.374568	0
CD4 T cell	3.60708	0	0	0	0	0	0	0	0	0	0	0	8.66513
CD4 T cell	0	0	0	0	0	0	0	0	0	0	0	0	0
CD4 T cell	5.21384	0	0	0	0	0	0	0	0	0	0	0	0
CD4 T cell	0	0	0	0	0	0	0	0	0	0	0	0	0
CD4 T cell	0	0	0	0	0	0	0	0	0	0	0	0.4885	0
CD4 T cell	0	0	0	0	0	0	0	0	0	0	0	0	0
CD4 T cell	0	0	0	0	0	0	0	0	0	0	0	0	5.46226
CD4 T cell	0	0	0	0	0	0	0	0	0	0	0	0	3.31982
CD4 T cell	0	0	0	0	0	0	0	0	0	0	0	0	0
CD4 T cell	0	0	0	0	0	0	0	0	0	0	0	0	0
CD4 T cell	0	0	0	0	0	0	0	0	0	0	0	0	0
CD4 T cell	0	0	0	1.78014	0	0	0	0	0	0	0	0.450331	0
CD4 T cell	0	0	0	0.808842	0	0	0	0	0	0	0	0.422189	0
CD4 T cell	0	0	0	0	0	0	0	0	0	0	0	0	0
CD4 T cell	0	0	0	0	0	0	0	0	0	0	0	0	0
CD4 T cell	0	0	0	0	0	0	0	0	0	0	0	7.42891	0
CD4 T cell	0	0	0	0	0	0	0	0	1.40893	0	0	0	3.28114
CD4 T cell	0	0	0	0	0	0	0	0	0	0	0	0	0
CD4 T cell	0	0	0	0	0	0	0	0	0	0	0	4.37322	0
CD4 T cell	0	0	0	0	0	0	0	0	0	0	0	7.81774	0
CD4 T cell	0	0	0	0	0	0	0	0	0	0	0	0	0
CD4 T cell	0	0	0	0	0	0	0	0	0	0	0	0.422538	0
CD4 T cell	0	0	0	0	0	0	0	0	1.33977	0	0	0.895872	0
CD4 T cell	0	0	0	0	0	0	0	0	0	0	0	0	7.88633
CD4 T cell	0	0	0	0	0	0	0	0	0	0	0	0	9.33582
CD4 T cell	0	0	0	0	0	0	0	0	0	0	0	0	0
CD4 T cell	0	0	0	0	0	0	0	0	1.40663	0	0	0.558868	0
CD4 T cell	0	0	0	0	0	0	0	0	0	0	0	0.502486	7.11662
CD4 T cell	0	0	0	0	0	0	0	0	0	0	0	0.738736	0
CD4 T cell	5.30324	0	0	0	0	0	0	0	0	0	0	0.424503	9.41695
CD4 T cell	0	0	0	0	0	0	0	0	0	0	0	0	3.52861
CD4 T cell	0	0	0	0	0	0	0	0	0	0	0	6.53358	9.99143
CD4 T cell	0	0	0	0	0	0	0	0	0	0	0	1.58722	5.34967
CD4 T cell	0	0	0	6.87681	0	0	0	0	0	0	0	1.11739	0
CD4 T cell	2.71225	0	0	0.566549	0	0	0	0	1.5638	0	0	0	0
CD4 T cell	0	0	0	0	0	0	0	0	0	0	0	0	8.93185
CD4 T cell	2.77621	0	0	0	0	0	0	0	0	0	0	0	0
CD4 T cell	0	0	0	0	0	0	0	0	0	0	6.36597	0	0
CD4 T cell	0	0	0	0	0	0	0	0	0	0	0	0	0
CD4 T cell	4.93611	0	0	0	0	0	0	0	0	0	0	0	0
CD4 T cell	0	0	0	0	0	0	0	0	0	0	0	0	0
CD4 T cell	0	0	0	0	0	0	0	0	0	0	0	0.636003	10.1903
CD4 T cell	0	3.73569	0	3.44215	0	0	0	0	0	0	0	1.41382	2.80455
CD4 T cell	0	0	0	0	0	0	0	0	0	0	0	0	0
CD4 T cell	0	0	0	0	0	0	0	0	0	0	0	1.86537	0
CD4 T cell	0	0	0	0	0	0	0	0	1.9895	0	0	0	9.67932
CD4 T cell	3.71351	0	0	0	0	0	0	0	0	0	0	1.00206	0
CD4 T cell	0	0	0	0	0	0	0	0	0	0	0	0	0
CD4 T cell	2.88758	0	0	0	0	0	0	0	0	0	0	0.954509	0
CD4 T cell	0	0	0	0	0	0	0	0	0	0	0	2.10912	0
CD4 T cell	0	0	0	0	0	0	0	0	2.17712	0	0	3.34233	5.47104
CD4 T cell	0	0	0	1.99291	0	0	0	0	0	0	0	0.713036	8.07262
CD4 T cell	2.88997	0	0	0	0	0	0	0	0	0	0	0.720296	8.78177
CD4 T cell	4.04	0	0	0	0	0	0	0	0	0	0	0.79351	0
CD4 T cell	0	0	0	2.46079	0	0	0	0	0	0	0	0	0
CD4 T cell	0	0	0	9.09513	0	0	0	0	0	0	0	0	0
CD4 T cell	0	0	0	0	0	0	0	0	0	0	0	0	0
CD4 T cell	0	0	0	0	0	0	0	0	0	0	0	0	5.98849
CD4 T cell	0	0	0	0	0	0	0	0	0	0	0	0	0
CD4 T cell	0	0	0	5.54906	0	0	0	0	0	0	0	0.88574	0
CD4 T cell	0	3.46493	0	1.12137	0	0	0	0	0	0	0	0	9.18842
CD4 T cell	0	0	0	0	0	0	0	0	0	0	0	0	0
CD4 T cell	2.94607	0	0	3.69985	0	0	0	0	0	0	0	5.88584	7.27861
CD4 T cell	5.02492	0	0	0	0	0	0	0	0	0	0	1.24107	0
CD4 T cell	0	0	0	1.31503	0	0	0	0	0	0	0	0	6.14187
CD4 T cell	6.63232	0	0	0	0	0	0	0	0	0	0	0	8.51936
CD4 T cell	0	0	0	0	0	0	0	0	0	0	0	0	0
CD4 T cell	0	0	0	0	0	0	0	0	0	0	0	0	8.57596
CD4 T cell	0	0	0	0	0	0	0	0	0	0	0	5.32059	0
CD4 T cell	0	0	0	1.12568	0	0	0	0	0	0	0	7.06358	5.39778
CD4 T cell	5.29947	0	0	0	0	0	0	0	0	0	0	0	8.36867
CD4 T cell	0	0	0	0	0	0	0	0	0	0	0	0	0
CD4 T cell	2.89166	0	0	0	0	0	0	0	0	0	0	1.61278	0
CD4 T cell	0	0	0	0	0	0	0	0	0	0	0	1.9915	8.10155
CD4 T cell	3.18107	0	0	0	0	0	0	0	0	0	0	0.707451	0
CD4 T cell	0	0	0	0	0	0	0	0	0	0	0	1.21176	8.32977
CD4 T cell	0	0	0	0	0	0	0	0	0	0	0	0	0
CD4 T cell	3.19806	0	0	0	0	0	0	0	0	0	0	0	0
CD4 T cell	0	0	0	0	0	0	0	0	0	0	0	0.737254	8.57949
CD4 T cell	3.30359	0	0	0	0	0	0	0	0	0	0	0.726901	7.46215
CD4 T cell	0	0	0	0	0	0	0	0	0	0	0	8.40625	8.47565
CD4 T cell	0	0	0	0	0	0	0	0	0	0	0	4.97969	0
CD4 T cell	2.85992	0	0	0	0	0	0	0	0	0	0	0.758524	0
CD4 T cell	0	0	0	0.682519	0	0	0	0	0	0	0	10.9887	7.02744
CD4 T cell	0	0	0	0	0	0	0	0	0	0	0	0	0
CD4 T cell	0	0	0	3.65632	0	0	0	0	0	0	0	0	0
CD4 T cell	0	0	0	0	0	0	0	0	0	0	0	1.2905	0
CD4 T cell	0	0	0	0	0	0	0	0	0	0	0	0	3.62151
CD4 T cell	0	0	0	0	0	0	0	0	0	0	0	0	0
CD4 T cell	0	0	0	0	0	0	0	0	0	0	0	0	10.6788
CD4 T cell	0	0	0	0	0	0	0	0	0	0	0	0.942444	3.86674
CD4 T cell	0	0	0	1.1244	0	0	0	0	0	0	0	1.53624	8.12455
CD4 T cell	0	0	0	0.737819	0	0	0	0	0	0	0	0	3.29781
CD4 T cell	0	0	0	0	0	0	0	0	0	0	3.93566	0	0
CD4 T cell	0	4.11654	0	0	0	0	0	0	0	0	0	6.72373	7.13295
CD4 T cell	0	0	0	1.32564	0	0	0	0	0	0	0	0.586753	0
CD4 T cell	0	0	0	0	0	0	0	0	0	0	0	0.811047	0
CD4 T cell	0	0	0	7.76626	0	0	0	0	0	0	0	0	0
CD4 T cell	0	0	0	0	0	0	0	0	2.37313	0	0	0	8.53565
CD4 T cell	0	0	0	0	0	0	0	0	0	0	0	0	9.34639
CD4 T cell	0	0	0	0	0	0	0	0	0	0	0	0.657062	8.8942
CD4 T cell	3.12754	3.33739	0	0	0	0	0	0	2.98968	0	0	1.09853	0
CD4 T cell	0	0	0	0	0	0	0	0	0	0	0	0	0
CD4 T cell	0	0	0	2.00063	0	0	0	0	0	0	0	1.24831	3.74143
CD4 T cell	0	0	0	0	0	4.91278	0	0	0	0	0	1.52746	8.74066
CD4 T cell	0	0	0	3.39433	0	0	0	0	0	0	0	0	0
CD4 T cell	0	0	0	0	0	0	0	0	0	0	0	0.739325	0
CD4 T cell	0	0	0	0.652313	0	0	0	0	1.77226	0	0	0	0
CD4 T cell	0	0	0	0	0	0	0	0	0	0	0	0	0
CD4 T cell	0	0	0	0	0	0	0	0	0	0	0	0.700508	5.98816
CD4 T cell	0	0	0	0	0	0	0	0	0	0	0	0	0
CD4 T cell	0	0	0	1.32133	0	0	0	0	0	0	0	0.617811	0
CD4 T cell	0	0	0	0	0	0	0	0	0	0	0	0.843992	8.1785
CD4 T cell	0	0	0	0	0	0	0	0	0	0	0	0	8.84017
CD4 T cell	0	0	0	0	0	0	0	0	0	0	0	0	0
CD4 T cell	0	0	0	0	0	0	0	0	0	0	0	0	0
CD4 T cell	6.49875	0	0	0	0	0	0	0	0	0	0	0	0
CD4 T cell	0	0	0	2.4504	0	0	0	0	0	0	0	0	0
CD4 T cell	0	0	0	0	0	0	0	0	0	0	0	0	0
CD4 T cell	0	0	0	0	0	0	0	0	0	0	0	1.28935	0
CD4 T cell	0	0	0	0	0	0	0	0	0	0	0	1.19004	0
CD4 T cell	0	0	0	0	0	5.39712	0	0	0	0	0	0	0
CD4 T cell	0	0	0	0	0	0	0	0	0	0	0	0.710757	0
CD4 T cell	4.56239	0	0	1.20167	0	0	0	0	0	0	0	0	0
CD4 T cell	0	0	0	0	0	0	0	0	0	0	0	0.884993	0
CD4 T cell	0	0	0	0.664308	0	0	0	0	0	0	0	0	0
CD4 T cell	0	0	0	0	0	0	0	0	0	0	0	0	0
CD4 T cell	2.91456	0	0	0	0	0	0	0	0	0	0	1.15072	0
CD4 T cell	0	0	0	0	0	0	0	0	0	0	0	2.09008	0
CD4 T cell	0	0	0	2.33661	0	0	0	0	0	0	0	5.26336	0
CD4 T cell	0	0	0	0	4.13651	0	0	0	0	0	0	0	0
CD4 T cell	0	0	0	1.70237	0	0	0	0	0	0	0	5.14288	8.56572
CD4 T cell	0	0	0	0	0	0	0	0	3.38408	0	0	0	0
CD4 T cell	0	0	0	0.937107	0	0	0	0	0	0	0	0	0
CD4 T cell	0	0	0	0	0	0	0	0	0	0	0	0	0
CD4 T cell	0	0	0	0	0	0	0	0	0	0	0	0	0
CD4 T cell	0	0	0	0	0	0	0	0	0	0	0	0	7.78409
CD4 T cell	0	0	0	1.72124	0	0	0	0	0	0	0	1.51126	0
CD4 T cell	4.44652	0	0	0	0	0	0	0	0	0	0	0	0
CD4 T cell	0	0	0	0	0	0	0	0	0	0	0	0	0
CD4 T cell	0	0	0	0	0	0	0	0	0	0	0	0.905871	0
CD4 T cell	0	0	0	0	0	0	0	0	0	0	0	0.845139	0
CD4 T cell	0	0	0	0	0	0	0	0	0	0	0	0	0
CD4 T cell	0	0	0	0	0	0	0	0	0	0	0	0	0
CD4 T cell	0	0	0	0	0	0	0	0	0	0	0	0.828874	0
CD4 T cell	0	0	0	0	0	0	0	0	0	0	0	1.00099	8.95388
CD4 T cell	0	0	0	0	0	0	0	0	0	0	0	9.1459	7.1473
CD4 T cell	0	0	0	0	0	0	0	0	0	0	0	0	6.22553
CD4 T cell	0	0	0	1.90434	0	0	0	0	0	0	0	1.6842	0
CD4 T cell	0	3.6735	0	0	0	0	0	0	0	0	0	0	0
CD4 T cell	0	0	0	2.21702	0	0	0	0	0	0	0	0	0
CD4 T cell	0	0	0	0	0	0	0	0	0	0	0	0.776316	0
CD4 T cell	0	0	0	0	0	0	0	0	0	0	0	0	0
CD4 T cell	0	0	0	0	0	0	0	0	0	0	0	0	0
CD4 T cell	0	0	0	0	0	0	0	0	0	8.23939	0	0	0
CD4 T cell	0	0	0	0	0	0	0	0	0	0	0	0.82611	0
CD4 T cell	0	4.43666	0	0	0	0	0	0	0	0	0	1.87961	0
CD4 T cell	0	0	0	0	0	0	0	0	0	0	0	0	8.19325
CD4 T cell	0	0	0	0	0	0	0	0	0	0	0	0	8.81676
CD4 T cell	0	0	0	0	0	0	0	0	0	0	0	0	0
CD4 T cell	3.25583	0	0	0	0	0	0	0	0	0	0	0.866886	4.93183
CD4 T cell	0	0	0	0	0	0	0	0	0	0	0	0	8.81983
CD4 T cell	0	0	0	0	0	0	0	0	0	0	0	6.41221	0
CD4 T cell	0	0	0	0	0	0	0	0	0	0	0	0	0
CD4 T cell	0	0	0	1.65545	0	0	0	0	0	0	0	0	8.98832
CD4 T cell	0	0	0	0	0	0	0	0	0	0	0	0	9.93977
CD4 T cell	0	0	0	0	0	0	0	0	0	0	0	0	9.66037
CD4 T cell	0	0	0	0	0	0	0	0	0	0	5.19503	0.725377	0
CD4 T cell	0	0	0	0	0	0	0	0	0	0	0	0.801218	9.97392
CD4 T cell	0	0	0	0	0	0	0	0	0	0	0	0	8.91385
CD4 T cell	0	0	0	0	0	0	0	0	0	0	0	0.810784	0
CD4 T cell	0	0	0	0	0	0	0	0	0	0	0	0	0
CD4 T cell	0	0	0	0	0	0	0	0	0	0	6.54445	0	0
CD4 T cell	0	0	0	0	0	0	0	0	0	0	0	0	7.76442
CD4 T cell	0	0	0	0	0	0	0	0	0	0	0	0	0
CD4 T cell	0	0	0	0	0	0	0	0	0	0	0	0	6.01218
CD4 T cell	3.2837	0	0	0	0	0	0	0	0	0	0	0	0
CD4 T cell	0	0	0	0	0	0	0	0	0	0	0	0.606594	0
CD4 T cell	0	0	0	1.21742	0	0	0	0	0	0	0	0	9.30226
CD4 T cell	0	0	0	0	0	0	0	0	0	0	0	0.976614	0
CD4 T cell	2.91177	0	0	0.777933	0	0	0	0	0	0	0	0	0
CD4 T cell	0	0	0	0	0	0	0	0	1.75962	0	0	0.688446	9.0301
CD4 T cell	0	0	0	8.26375	0	0	0	0	0	0	0	6.4937	0
CD4 T cell	0	0	0	0	0	0	0	0	0	0	0	0	8.89664
CD4 T cell	0	0	0	0	0	0	0	0	0	0	0	7.17805	0
CD4 T cell	0	0	0	0.774888	0	0	0	0	0	0	0	4.5647	0
CD4 T cell	0	0	0	0	0	0	0	0	0	0	0	0	0
CD4 T cell	0	0	0	0	0	0	0	0	0	0	0	0	0
CD4 T cell	2.60507	0	0	0	0	0	0	0	0	0	0	0.677317	8.40994
CD4 T cell	0	0	0	0	0	0	0	0	0	0	0	0	0
CD4 T cell	6.44314	0	0.353989	0	0	0	0	0	0	0	0	0	0
CD4 T cell	0	0	1.74691	0	0	0	0	0	0	0	0	4.54409	0
CD4 T cell	3.5614	0	0	0	0	0	0	0	0	0	0	0	0
CD4 T cell	0	0	0	0	0	0	0	0	0	0	0	0.770901	9.98881
CD4 T cell	0	0	0	0	0	0	0	0	0	0	0	0.646002	10.5517
CD4 T cell	0	0	0	0.859002	0	0	0	0	0	0	0	0	0
CD4 T cell	0	0	0	0	0	0	0	0	0	0	0	0	8.80516
CD4 T cell	0	0	0	0	0	0	0	0	0	0	0	0.644549	10.05
CD4 T cell	0	0	0	2.59246	0	0	0	0	0	0	0	0	0
CD4 T cell	0	0	0	0	0	0	0	0	3.33517	0	0	0.792037	3.70553
CD4 T cell	0	0	0	0	0	0	0	0	1.22931	0	0	0	7.50757
CD4 T cell	0	0	0	0	0	0	0	0	0	0	0	0	9.29196
CD4 T cell	4.20834	0	0	0	0	0	0	0	0	0	0	5.55068	9.43003
CD4 T cell	0	0	0	0	0	0	0	0	0	0	0	0.88653	0
CD4 T cell	0	0	0	0	0	0	0	0	0	0	0	1.02205	7.09785
CD4 T cell	0	0	0	0	0	0	0	0	0	0	0	0	0
CD4 T cell	0	0	0	0	0	0	0	0	0	0	0	0	0
CD4 T cell	0	0	0	0	0	0	0	0	0	0	0	1.63308	8.76892
CD4 T cell	0	0	0	0	0	0	0	0	0	0	0	0.453134	9.15034
CD4 T cell	0	0	0	0.385813	0	0	0	0	0	0	0	0	7.15478
CD4 T cell	2.47166	0	0	0	0	0	0	0	0	0	0	0.484521	8.84213
CD4 T cell	3.73046	0	0	0.985251	0	0	0	0	0	0	0	0	0
CD4 T cell	1.545	0	0	0	0	0	0	0	0	0	0	0.425727	9.17215
CD4 T cell	0	0	0	0	0	0	0	0	0	6.6132	0	0	1.91007
CD4 T cell	0	0	0	0	0	0	0	0	0	0	0	0.183048	0
CD4 T cell	0	4.62968	0	0.430822	0	0	0	0	0	0	0	0.222197	8.99977
CD4 T cell	3.00183	0	0	0	0	0	0	0	0	0	0	0	1.92571
CD4 T cell	0	2.9413	0	0	0	0	0	0	0	0	0	0.151483	0
CD4 T cell	0	0	0	0	0	0	0	0	0	0	0	4.24576	6.11599
CD4 T cell	0	0	0	0	0	0	0	0	0	0	0	0.129023	1.45387
CD4 T cell	0	0	0	0	0	0	0	0	0	0	0	0.327553	7.19627
CD4 T cell	0	0	0	0	0	0	0	0	4.45475	0	0	0	0
CD4 T cell	0	0	0	0	0	0	0	0	2.46844	0	0	0.204163	7.9977
CD4 T cell	0	0	0	0	0	0	0	0	0	0	0	0	0
CD4 T cell	2.99251	0	0	0	0	0	0	0	0	0	0	0.143886	0
CD4 T cell	2.1591	0	0	0	0	0	0	0	0	0	0	0.20503	1.43469
CD4 T cell	0	0	0	0	0	0	0	0	0	0	0	0	0
CD4 T cell	0	0	0	0	0	0	0	0	2.2923	0	0	0	0
CD4 T cell	0	0	0	1.42058	0	0	0	0	0	0	0	0.100573	0.841416
CD4 T cell	2.17099	0	0	0.333322	0	0	0	0	0	0	0	0	7.936
CD4 T cell	1.74314	0	0	0	0	0.164359	0	0	0	0	0	0.11844	8.44654
CD4 T cell	1.74854	0	0	0	0	0	0	0	0	6.62314	0	0	0
CD4 T cell	0	0	0	0	0	0	0	0	0	0	0	0	0
CD4 T cell	0.957401	0	0	0.849537	0	0	0	0	0	0	0	0	0
CD4 T cell	0	0	0	0	0	0	0	0	0	0	0	0.293498	0
CD4 T cell	0	0	0	0.981802	0	0	0	0	0	0	0	0	0
CD4 T cell	0	0	0	0	0	0	0	0	0	0	0	0.342624	0
CD4 T cell	4.67728	0	0	0	0	0	0	0	0	0	0	0.567066	0
CD4 T cell	4.16632	0	0	0	0	0	0	0	0	0	0	0	0
CD4 T cell	0	0	0	0	0	0	0	0	0	0	0	0.185957	0
CD4 T cell	0	0	0	0	0	0	0	0	0	0	0	0.354277	0
CD4 T cell	0	0	0	0	0	0	0	0	0	0	0	2.41751	0
CD4 T cell	0	0	0	0	0	0	0	0	0	0	0	0.320802	2.54385
CD4 T cell	0	0	0	2.3878	0	0	0	0	0	0	0	0.417443	0
CD4 T cell	0	0	0	1.28228	0	0	0	0	0	0	0	0.31241	9.00965
CD4 T cell	0	0	0	0	0	0	0	0	1.87128	0	0	0.240361	0
CD4 T cell	0	0	0	3.20495	0	0	0	0	2.62892	0	0	0.152916	9.92182
CD4 T cell	0	0	0	0	0	0	0	0	0	0	0	0	0
CD4 T cell	0	0	0	0	0	0	0	0	0	0	0	0.151852	3.3366
CD4 T cell	0	0	0	0	0	0	0	0	0	0	0	5.23185	0
CD4 T cell	0	0	0	0.35876	0	0	0	0	0	0	0	0	0
CD4 T cell	0	0	0	0	0	0	0	0	0	0	0	0.448089	1.7878
CD4 T cell	0	0.522547	0	0	0	0	0	0	0	0	0	0	8.44533
CD4 T cell	0	0	0	0	0	0	0	0	0	0	0	0.27421	0
CD4 T cell	0	0	0	0	0	0	0	0	0	0	0	0.143611	3.17303
CD4 T cell	0	0	0	0	0	0	0	0	0	0	0	0	0
CD4 T cell	0	0	0	0	0	0	0	0	0	0	0	0.483054	0
CD4 T cell	0	0	0	0	0	0	0	0	0	0	0	0	0
CD4 T cell	0	0	0	0	0	0	0	0	0	0	0	0	6.21544
CD4 T cell	0	0	0	0	0	0	0	0	0	0	0	0	0
CD4 T cell	0	0	0	0	0	0	0	0	0	0	0	0	9.74536
CD4 T cell	0	0	0	0	0	0	0	0	0	0	0	0	0
CD4 T cell	0	3.19674	0	0	0	0	0	0	0	0	0	0	7.22802
CD4 T cell	0	0	0	1.27392	0	0	0	0	0	0	0	0.401012	9.82601
CD4 T cell	1.52195	0	0	1.33607	0	0	0	0	0	0	0	0	0
CD4 T cell	0	0	0	0	0	0	0	0	0	0	0	0	7.06751
CD4 T cell	0	0	0	0.939649	0	0	0	0	0	0	0	0	0
CD4 T cell	0	0	0	0	0	0	0	0	0	0	0	0	7.98451
CD4 T cell	1.87458	0	0	0	0	0	0	0	0	0	0	0	0
CD4 T cell	0	0	0	0	0	0	0	0	0	0	0	0.150302	0
CD4 T cell	0	0	0	0	0	0	0	0	0	0	0	0.895116	0
CD4 T cell	0	0	0	0	0	0	0	0	0	0	0	0	4.83214
CD4 T cell	2.93854	0	0	5.52845	0	0	0	0	0	0	0	0	8.31074
CD4 T cell	0	0	0	0	0	0	0	0	0	0	0	0.180961	0
CD4 T cell	0	0	0	0.781626	0	0	0	0	0	0	0	0.298661	8.22231
CD4 T cell	2.56716	0	0	0	0	0	0	0	0	0	0	0.165453	0
CD4 T cell	0	0	0	0	0	0	0	0	0	0	0	0.505193	0
CD4 T cell	0	0	0	0	0	0	0	0	0	0	0	0.613562	0
CD4 T cell	0	0	0	0	0	0	0	0	0	0	0	0	0
CD4 T cell	0	0	0	0	0	0	0	0	0	0	0	0.316102	9.40186
CD4 T cell	0	2.89377	0	0	0	0	0	0	0	0	0	0.123288	8.30201
CD4 T cell	0	0	0	0	0	0	0	0	0	0	0	0.546626	0
CD4 T cell	0	0	0	7.58106	0	0	0	0	0	0	0	0.204576	8.47768
CD4 T cell	0	0	0	0	0	0	0	0	2.17854	0	0	0	0
CD4 T cell	0	0	0	0	0	0	0	0	0	0	0	0	4.80749
CD4 T cell	0	0	0	0	0	0	0	0	0	0	0	0.165468	0
CD4 T cell	0	0	0	0	0	0	0	0	0	0	0	0.188227	0
CD4 T cell	4.58082	0	0	0	0	0	0	0	0	0	0	0	1.85086
CD4 T cell	0	0	0	0.334202	0	0	0	0	0	0	0	0.320414	0
CD4 T cell	0	0	0	3.38026	0	0	0	0	0	0	0	0	6.83097
CD4 T cell	0	0	0	0	0	0	0	0	0	0	0	0	7.23906
CD4 T cell	3.76685	0	0	0	0	0	0	0	0	0	0	0	7.85177
CD4 T cell	2.89169	0	0	0	0	0	0	0	0	0	0	0.290145	7.81037
CD4 T cell	0	0	0	0	0	0	0	0	0	0	0	0.276093	0
CD4 T cell	0	0	0	0.290545	0	0	0	0	0	0	0	0	0
CD4 T cell	0	0	0	0	0	0	0	0	0	0	0	0	8.73564
CD4 T cell	0	0	0	0	0	0	0	0	0	0	0	0.151954	2.26886
CD4 T cell	0	0	0	0	0	0	0	0	0	0	0	0	2.04375
CD4 T cell	0	0	0	0	0	0	0	0	0	0	0	0.230455	8.95229
CD4 T cell	0	0	0	2.84681	0	0	0	0	0	0	0	0.344467	0
CD4 T cell	6.30925	0	0	3.13104	0	0	0	0	0	0	0	0	0
CD4 T cell	0	0	0	0	0	0	0	0	2.89417	0	0	0.565738	0
CD4 T cell	0	0	0	0	0	0	0	0	0	0	0	0.176373	10.3262
CD4 T cell	6.40559	0	0	0	0	0	0	0	0	0	0	0	0
CD4 T cell	0	0	0	2.51119	0	0	0	0	0	0	0	0.356526	8.65715
CD4 T cell	0	0	0	0	0	0	0	0	0	0	0	0.922571	0
CD4 T cell	0	0	0	0	0	0	0	0	0	0	0	0.317956	0
CD4 T cell	0	0	0	0	0	0	0	0	0	0	0	0	2.00637
CD4 T cell	0	0	0	0	0	0	0	0	0	0	0	0.333365	0
CD4 T cell	0	4.2345	0	0.316896	0	0	0	0	0	0	0	0.159927	9.07915
CD4 T cell	2.0887	0	0	1.5969	0	0	0	0	0	0	0	0.186497	1.91706
CD4 T cell	0	0	0	0	0	0	0	0	0	0	0	0.172936	7.75937
CD4 T cell	0	0	0	0	0	0	0	0	0	0	0	0	9.03934
CD4 T cell	3.93399	0	0	0	0	0	0	0	0	0	0	0.427074	1.64952
CD4 T cell	0	0	0	0	0	0	0	0	0	0	0	0	0
CD4 T cell	5.67407	0	0	0	0	0	0	0	0	6.63491	0	0	0
CD4 T cell	3.48821	0	0	0	0	0	0	0	0	0	0	0	10.1184
CD4 T cell	4.24458	0	0	0	0	0	0	0	0	0	0	0.667861	0
CD4 T cell	0	0	0	0.623341	0	0	0	0	0	0	0	0	0
CD4 T cell	4.12105	0	0	0	0	0	0	0	0	0	0	0	1.69499
CD4 T cell	0.804253	0	0	0	0	0	0	0	0	0	0	0	5.44794
CD4 T cell	3.55129	0	0	0	0	0	0	0	0	0	0	0.473834	8.77402
CD4 T cell	3.39513	4.1178	0	0	0	0	0	0	0	0	0	0.422333	1.75021
CD4 T cell	0	0	0	0	0	0	0	0	0	0	0	0	10.5694
CD4 T cell	3.42179	0	0	0	0	0	0	0	0	0	0	0.290562	6.74274
CD4 T cell	2.09847	0	0	0	0	0	0	0	0	0	0	0.193153	9.31862
CD4 T cell	0	0	0	0	0	0	0	0	0	0	0	0.290002	0
CD4 T cell	2.10404	0	0	0.6676	0	0	0	0	0	0	0	0	0
CD4 T cell	2.0529	0	0	0	0	0	0	0	0	0	0	0.342837	8.00079
CD4 T cell	0	0	0	0	0	0	0	0	0	0	0	0.19302	0
CD4 T cell	0	0	0	0	0	0	0	0	0	0	0	0	1.9628
CD4 T cell	0	3.9028	0	7.64959	0	0	0	0	0	0	0	0	7.55353
CD4 T cell	0	0	0	0	0	0	0	0	0	0	0	0.194637	1.936
CD4 T cell	0	0	0	0	0	0	0	0	0	0	0	0.335251	0
CD4 T cell	0	0	0	0.321989	0	0	0	0	1.38884	0	0	0.0837041	0
CD4 T cell	0	0	0	0	0	0	0	0	0	0	0	0	10.6444
CD4 T cell	0	0	0	0.283098	0	0	0	0	0	0	0	0.694499	0
CD4 T cell	0	0	0	0.350805	0	0	0	0	0	0	0	0.177938	0
CD4 T cell	0	0	0	0	0	4.83225	0	0	0	0	0	0.150143	0
CD4 T cell	3.28993	0	0	0	0	0	0	0	0	0	0	1.03576	9.00419
CD4 T cell	1.86052	0	0	0	0	0	0	0	0	0	0	0.641489	1.79045
CD4 T cell	0	0	0	0	0	0	0	0	0	0	0	0.299888	9.57971
CD4 T cell	0	0	0	0	0	0	0	0	0	0	0	0.832254	0
CD4 T cell	0	0	0	0	0	0	0	0	0	0	0	2.16854	1.85293
CD4 T cell	0	0	0	0.499177	0	0	0	0	0	0	0	0.131124	2.30605
CD4 T cell	0	0	0	1.03654	0	0	0	0	0	0	0	0	7.76017
CD4 T cell	0	0	0	0	0	0	0	0	0	0	0	0.171447	0
CD4 T cell	0	0	0	0	0	0	0	0	0	0	0	0.381134	0
CD4 T cell	2.87044	0	0	0	0	0	0	0	2.07014	0	0	0.161915	1.86921
CD4 T cell	1.91751	0	0	0	0	0	0	0	0	0	0	0	8.30786
CD4 T cell	0	0	0	0	0	0	0	0	0	0	0	0.150489	6.7343
CD4 T cell	0	0	0	0	0	0.54605	0	0	0	0	0	0	1.0302
CD4 T cell	0	0	0	1.83466	0	5.14534	0	0	2.24155	0	0	0.316083	9.95797
CD4 T cell	0	0	0	0	0	0	0	0	0	0	0	0.130933	0
CD4 T cell	0	0	0	0	0	0	0	0	0	0	0	0.244173	0
CD4 T cell	3.14314	0	0	0	0	0	0	0	0	0	0	0	1.0202
CD4 T cell	0	0	0	0	0	0	0	0	0	0	0	0.175327	9.20036
CD4 T cell	1.49833	0	0	0	0	0	0	0	0	0	0	0.136115	8.87445
CD4 T cell	2.72839	0	0	0	0	0	0	0	0	0	0	0.498018	1.62834
CD4 T cell	0	0	0	0	0	0	0	0	0	0	0	0	1.43633
CD4 T cell	0	0	0	0	0	0	0	0	0	0	0	0	9.98305
CD4 T cell	2.70544	0	0	0.265313	0	0	0	0	0	0	0	0.254479	8.15896
CD4 T cell	0	0	0	0	0	0	0	0	0	0	0	0.496804	2.31114
CD4 T cell	0	0	0	0	0	0	0	0	0	0	0	0.877806	8.69304
CD4 T cell	1.71376	0	0	2.7576	0	0	0	0	2.08372	0	0	0	8.27855
CD4 T cell	0	3.49176	0	0	0	0	0	0	0	0	0	0	9.837
CD4 T cell	0	0	0	0	0	0	0	0	0	0	0	0	0
CD4 T cell	0	0	0	6.68467	0	0	0	0	0	0	0	0.254782	1.63101
CD4 T cell	5.9542	0	0	0	0	0	0	0	0	0	0	0	1.71362
CD4 T cell	0	0	0	0	0	0	0	0	0	0	0	0	9.10624
CD4 T cell	0	0	0	0	0	0	0	0	2.34893	0	0	0	9.43585
CD4 T cell	0	0	0	0	0	0	0	0	0	0	0	0	6.02997
CD4 T cell	0	0	0	0	0	0	0	0	0	0.562313	0	0.144976	3.65517
CD4 T cell	0	0	0	0.271702	0	3.16269	0	0	0	0	0	0.258913	7.23462
CD4 T cell	0	0	0	0	0	0	0	0	0	0	0	0.413083	8.21852
CD4 T cell	0	0	0	0.273145	0	0	0	0	0	0	0	0.136756	8.71839
CD4 T cell	2.02426	0	0	0	0	0	0	0	0	0	0	0.145032	8.66781
CD4 T cell	3.41007	0	0	0	0	0	0	0	0	0	0	0.29599	0
CD4 T cell	0	0	0	0	0	0	0	0	0	0	0	0.278965	9.68532
CD4 T cell	0	0	0	0	0	0	0	0	0	0	0	0.141518	0
CD4 T cell	0	0	0	0	0	0	0	0	0	0	0	0.146717	8.70332
CD4 T cell	2.9885	0	0	0	0	0	0	0	0	0	0	0.457848	0
CD4 T cell	0	0	0	0	0	0	0	0	0	0	0	0.255152	8.56299
CD4 T cell	0	0	0	0	0	0	0	0	0	0	0	0	1.58814
CD4 T cell	0	0	0	1.34926	0	0	0	0	0	0	0	0	0
CD4 T cell	2.64272	0	0	0	0	5.94155	0	0	0	0	0	0	9.14065
CD4 T cell	0	0	0	0	0	0.25088	0	0	0	0	0	0.134022	0.978315
CD4 T cell	8.05814	0	0	0	0	0	0	0	0	0	0	0	8.79562
CD4 T cell	0	0	0	0	0	0	0	0	0	0	0	0.160499	1.77513
CD4 T cell	0	0	0	0	0	0	0	0	0	0	0	0.355981	7.34587
CD4 T cell	0	0	0	0	0	0	0	0	0	0	0	0.160536	8.56189
CD4 T cell	0	0	0	0	0	0	0	0	0.867097	0	0	0.485705	0
CD4 T cell	0	0	0	2.07723	0	0	0	0	0	0	0	0.305671	9.57583
CD4 T cell	0	0	0	0	0	0	0	0	2.51555	0	0	0.282457	9.36561
CD4 T cell	0	0	0	1.10845	0	0	0	0	5.84235	0	0	1.41096	0
CD4 T cell	0	0	0	0	0	0	0	0	0	0	0	0.154909	0
CD4 T cell	0	0	0	0	0	0	0	0	0	0	0	0	0
CD4 T cell	0	0	0	0	0	0	0	0	0	0	0	0	0
CD4 T cell	0	0	0	0	0	0	0	0	0	0	0	0	1.26593
CD4 T cell	4.13692	0	0	2.84432	0	0	0	0	0	0	0	0.439043	0
CD4 T cell	2.03665	0	0	0	0	0	0	0	0	0	0	0.615496	0
CD4 T cell	3.17107	0	0	2.41884	0	0	0	0	0	0	0	0	0
CD4 T cell	6.39044	0	0	0	0	0	0	0	0	0	0	0	6.11977
CD4 T cell	0	0	0	0	0	0	0	0	0	0	0	1.07682	2.83159
CD4 T cell	0	0	0	2.70149	0	0	0	0	0	0	0	0.219703	9.37656
CD4 T cell	0	0	0	1.07539	0	0.347357	0	0	0	0	0	0	9.55359
CD4 T cell	0	0	0	0	0	0	0	0	0	0	0	0	0
CD4 T cell	0	0	0	1.3697	0	0	0	0	0	0	0	0	0
CD4 T cell	3.91429	0	0	0.343985	0	0	0	0	0	0	0	0.174973	0
CD4 T cell	0	0	0	0.732579	0	0	0	0	0	0	0	0.376937	9.56968
CD4 T cell	0	0	0	0	0	0	0	0	0	0.389476	0	0	2.16396
CD4 T cell	1.84049	3.92723	0	0	0	0	0	0	0	0	0	0	8.52622
CD4 T cell	0	0	0	0	0	0	0	0	0	0	0	0	0
CD4 T cell	3.62885	0	0	0	0	0	0	0	0	0	0	0	0
CD4 T cell	0	0	0	0	0	0	0	0	0	0	0	1.46853	0
CD4 T cell	0	0	0	0.947958	0	0	0	0	0	0	0	1.25448	7.23214
CD4 T cell	0	0	0	0	0	0	0	0	0	0	0	1.39707	0
CD4 T cell	0	0	0	0	0	0	0	0	0	0	0	1.22685	10.428
CD4 T cell	0	0	0	0	0	0	0	0	0	0	0	0	0
CD4 T cell	0	0	0	0	0	0	0	0	0	0	0	0	0
CD4 T cell	0	0	0	0	0	0	0	0	0	0	0	1.38969	0
CD4 T cell	0	0	0	0	0	0	0	0	0	0	0	0	0
CD4 T cell	0	0	0	1.51996	0	0	0	0	0	0	0	1.34863	0
CD4 T cell	0	0	0	0	0	0	0	0	0	5.96903	0	1.99517	0
CD4 T cell	0	0	0	0	0	0	0	0	0	0	0	2.03497	8.0796
CD4 T cell	0	0	0	0	0	0	0	0	0	0	0	2.12628	2.3878
CD4 T cell	0	0	0	0	0	0	0	0	0	0	0	2.16969	0
CD4 T cell	3.38159	0	0	0	0	0	0	0	0	0	0	0	8.22505
CD4 T cell	0	0	0	0	0	0	0	0	0	0	0	0	0
CD4 T cell	0	0	0	0	0	0	0	0	0	0	0	0	0
CD4 T cell	0	0	0	0	0	0	0	0	0	0	0	0	7.36805
CD4 T cell	0	0	0	0	0	0	0	0	0	0	0	0	0
CD4 T cell	0	0	0	0	0	0	0	0	0	0	0	0	2.51091
CD4 T cell	0	0	0	0	0	0	0	0	0	0	0	0	6.5015
CD4 T cell	0	0	0	0	0	0	0	0	0	0	0	0	9.43593
CD4 T cell	0	0	0	0	0	0	0	0	0	0	0	0	8.87758
CD4 T cell	0	0	0	0	0	0	0	0	0	0	0	0	0
CD4 T cell	0	0	0	0	0	0	0	0	0	0	0	0	8.60114
CD4 T cell	0	0	0	0	0	0	0	0	0	0	0	2.06343	0
CD4 T cell	0	0	0	0	0	0	0	0	0	0	0	0	0
CD4 T cell	0	0	0	2.11198	0	0	0	0	0	0	0	0	9.0703
CD4 T cell	3.05133	0	0	0	0	0	0	0	0	0	0	0	0
CD4 T cell	0	0	0	0	0	0	0	0	0	0	0	0	1.57818
CD4 T cell	0	0	0	0	0	0	0	0	0	0	0	0	0
CD4 T cell	0	0	0	0	0	0	0	0	0	0	0	0	1.63066
CD4 T cell	0	0	0	0	0	0	0	0	0	0	0	1.25789	0
CD4 T cell	0	8.48008	0	0	0	0	0	0	0	0	0	1.4052	8.51016
CD4 T cell	0	0	0	0	0	0	0	0	0	0	0	0	0
CD4 T cell	0	0	0	0	0	0	0	0	0	0	0	0	9.28088
CD4 T cell	4.27722	0	0	0	0	0	0	0	0	0	0	0	8.32674
CD4 T cell	0	0	0	0	0	0	0	0	0	0	0	0	0
CD4 T cell	0	0	0	0	0	0	0	0	0	0	0	0	9.41843
CD4 T cell	0	0	0	0	0	0	0	0	0	0	0	1.4471	8.45778
CD4 T cell	0	0	0	0.994717	0	0	0	0	0	0	0	0	0
CD4 T cell	3.02792	0	0	0	0	0	0	0	0	0	0	0	0
CD4 T cell	0	0	0	0	0	0	0	0	0	0	0	0	0
CD4 T cell	0	0	0	0	0	0	0	0	0	0	0	0	0
CD4 T cell	0	0	0	0	0	0	0	0	0	0	0	0	0
CD4 T cell	0	0	0	0	0	0	0	0	0	0	0	0	0
CD4 T cell	3.46565	0	0	1.56429	0	0	0	0	5.19083	0	0	0	8.26309
CD4 T cell	0	0	0	0	0	0	0	0	0	0	0	0	0
CD4 T cell	0	0	0	0	0	0	0	0	0	0	0	1.29979	0
CD4 T cell	0	0	0	0	0	0	0	0	0	0	0	1.40204	0
CD4 T cell	0	0	0	0	0	0	0	0	0	0	0	2.13946	0
CD4 T cell	0	0	0	0	0	0	0	0	0	0	0	0	7.27941
CD4 T cell	0	0	0	0	0	0	0	0	0	0	0	1.96045	9.68007
CD4 T cell	0	0	0	3.09677	0	0	0	0	0	0	0	0	0
CD4 T cell	0	4.35918	0	0	0	0	0	0	0	0	0	0	0
CD4 T cell	0	0	0	8.25155	0	0	0	0	0	0	0	1.50152	7.75816
CD4 T cell	0	0	0	0	0	0	0	0	0	0	0	0	8.24545
CD4 T cell	0	0	0	0	0	0	0	0	0	0	0	0	0
CD4 T cell	3.78287	0	0	9.22055	0	0	0	0	2.57503	0	0	1.22236	1.56655
CD4 T cell	0	0	0	0	0	0	0	0	0	0	0	2.66905	0
CD4 T cell	0	0	0	0.997552	0	0	0	0	0	0	0	0	0
CD4 T cell	0	0	0	1.06633	0	0	0	0	0	0	0	2.20867	0
CD4 T cell	0	0	0	0	0	0	0	0	0	0	0	1.30084	0
CD4 T cell	3.52881	0	0	0	0	0	0	0	0	0	0	0	8.67175
CD4 T cell	0	0	0	1.02656	0	0	0	0	0	0	0	0	0
CD4 T cell	0	3.88869	0	0	0	0	0	0	0	0	0	0	8.00277
CD4 T cell	0	0	0	0	0	0	0	0	0	0	0	0	0
CD4 T cell	0	0	0	0	0	0	0	0	2.54872	0	0	0	8.99596
CD4 T cell	0	0	0	0	0	0	0	0	0	0	0	0	0
CD4 T cell	0	0	0	0	0	0	0	0	0	0	0	0	0
CD4 T cell	0	0	0	0	0	0	0	0	0	0	0	2.38724	0
CD4 T cell	0	0	0	0	0	0	0	0	0	0	0	0	8.89579
CD4 T cell	0	0	0	0	0	0	0	0	0	0	0	0	0
CD4 T cell	0	0	0	0	0	0	0	0	0	0	0	0	8.46001
CD4 T cell	0	0	0	0	0	0	0	0	3.58559	0	0	0	0
CD4 T cell	0	0	0	0	0	0	0	0	0	0	0	0	8.99643
CD4 T cell	0	0	0	1.05135	0	0	0	0	0	0	0	1.46523	0
CD4 T cell	0	0	0	0	0	0	0	0	0	0	0	0	0
CD4 T cell	0	0	0	0	0	0	0	0	0	0	0	0	0
CD4 T cell	4.97573	0	0	0	0	0	0	0	0	0	0	0	0
CD4 T cell	0	0	0	0	0	0	0	0	0	0	0	0	10.5838
CD4 T cell	3.56266	0	0	0	0	0	0	0	0	0	0	0	0
CD4 T cell	0	0	0	0	0	0	0	0	4.22995	0	0	1.35837	0
CD4 T cell	0	0	0	0	0	0	0	0	0	0	0	0	0
CD4 T cell	0	0	0	0	0	0	0	0	0	0	0	0	0
CD4 T cell	0	0	0	0	0	0	0	0	0	0	0	1.3171	3.14295
CD4 T cell	0	0	0	3.30428	0	0	0	0	0	0	0	1.2792	8.87537
CD4 T cell	3.37701	0	0	0	0	0	0	0	0	0	0	1.88947	9.36135
CD4 T cell	0	0	0	0	0	0	0	0	0	0	0	1.62638	0
CD4 T cell	0	0	0	0	0	0	0	0	0	0	0	1.41577	0
CD4 T cell	3.70846	0	0	0	0	0	0	0	0	0	0	1.48042	0
CD4 T cell	0	0	0	1.02887	0	0	0	0	0	0	0	0	0
CD4 T cell	0	0	0	0	0	0	0	0	0	0	0	0	0
CD4 T cell	0	0	0	0	0	0	0	0	0	0	0	0	8.35633
CD4 T cell	5.0789	0	0	0	0	0	0	0	2.87497	0	0	0	9.008
CD4 T cell	0	0	0	0	0	0	0	0	0	0	0	0	0
CD4 T cell	3.33086	0	0	3.76564	0	0	0	0	0	0	0	0	8.38706
CD4 T cell	0	0	0	0	0	0	0	0	0	0	0	0	0
CD4 T cell	0	4.55962	0	0	0	0	0	0	0	0	0	1.29247	0
CD4 T cell	0	0	0	4.48536	0	0	0	0	0	0	0	0	1.76402
CD4 T cell	0	0	0	0	0	0	0	0	0	0	0	0	9.52001
CD4 T cell	3.34205	0	0	0	0	0	0	0	0	0	0	0	9.47197
CD4 T cell	0	0	0	0	0	0	0	0	0	0	0	0	0
CD4 T cell	0	0	0	0	0	5.34299	0	0	0	0	0	0	2.42375
CD4 T cell	0	0	0	0	0	0	0	0	0	0	0	0	0
CD4 T cell	0	0	0	0	0	0	0	0	0	0	0	2.17695	0
CD4 T cell	0	0	0	0	0	0	0	0	0	0	0	1.99837	8.9686
CD4 T cell	5.83165	0	0	0.964756	0	0	0	0	2.78836	0	0	0	2.33402
CD4 T cell	0	0	0	0	0	0	0	0	0	0	0	1.43402	0
CD4 T cell	4.03214	0	0	0	0	0	0	0	0	0	0	1.34987	8.86962
CD4 T cell	0	0	0	0	0	0	0	0	0	0	0	1.50822	0
CD4 T cell	0	0	0	0	0	0	0	0	2.91632	0	0	3.06602	0
CD4 T cell	0	0	0	3.70027	0	0	0	0	0	0	0	0	9.2082
CD4 T cell	0	0	0	0	0	0	0	0	0	0	0	0	0
CD4 T cell	3.81128	0	0	0	0	0	0	0	0	0	0	0	0
CD4 T cell	4.58351	0	0	0	0	0	0	0	0	0	0	1.55521	9.00862
CD4 T cell	0	0	0	0.958328	0	0	0	0	0	0	0	3.13911	0
CD4 T cell	3.16367	0	0	0	0	0	0	0	0	0	0	0	8.36559
CD4 T cell	0	0	0	2.68336	0	0	0	0	0	0	0	0	2.42897
CD4 T cell	0	0	0	0	0	0	0	0	0	0	0	0	0
CD4 T cell	0	0	0	0	0	0	0	0	0	0	0	1.42161	8.32253
CD4 T cell	0	0	0	0	0	0	0	0	0	0	0	0	2.54724
CD4 T cell	0	0	0	0	0	0	0	0	0	0	0	0	0
CD4 T cell	4.13106	0	0	0	0	0	0	0	0	0	0	0	2.32894
CD4 T cell	0	0	0	0	0	0	0	0	0	0	0	1.37729	2.27409
CD4 T cell	0	0	0	0	0	0	0	0	2.5823	0	0	0	0
CD4 T cell	0	0	0	0	0	0	0	0	0	0	0	0	7.77483
CD4 T cell	1.64722	0	0	0	0	0	0	0	0	0	0	0	0
CD4 T cell	0	0	0	0	0	0	0	0	0	0	0	0	0
CD4 T cell	0	0	0	1.75495	0	0	0	0	0	0	0	0	0
CD4 T cell	0	0	0	0	0	0	0	0	0	0	0	0	0
CD4 T cell	0	0	0	0	0	0	0	0	0	0	0	1.50213	0
CD4 T cell	0	0	0	0	0	0	0	0	0	0	0	0	10.7842
CD4 T cell	0	0	0	0	0	0	0	0	0	0	0	0	8.82999
CD4 T cell	0	0	0	0	0	0	0	0	0	0	0	0	0
CD4 T cell	0	0	0	0	0	0	0	0	0	0	0	2.25555	7.18853
CD4 T cell	0	0	0	0	0	0	0	0	0	0	0	1.5015	10.5601
CD4 T cell	0	0	0	0	0	0	0	0	0	0	0	0	8.01557
CD4 T cell	0	0	0	0	0	0	0	0	0	0	0	0	7.94063
CD4 T cell	0	0	0	0	0	0	0	0	2.96069	0	0	0	9.30204
CD4 T cell	3.20428	0	0	4.14055	0	0	0	0	0	0	0	0	1.78632
CD4 T cell	0	0	0	0	0	0	0	0	0	0	0	0	6.64384
CD4 T cell	0	0	0	0	0	0	0	0	0	0	0	2.80912	0
CD4 T cell	0	0	0	0	0	0	0	0	0	0	0	0	0
CD4 T cell	0	0	0	0	0	0	0	0	0	0	0	1.38524	0
CD4 T cell	5.67317	0	0	0	0	0	0	0	0	0	0	0	0
CD4 T cell	0	0	0	0	0	0	0	0	0	0	0	0	5.59523
CD4 T cell	0	0	0	0	0	0	0	0	0	0	0	0	1.85968
CD4 T cell	0	0	0	0	0	0	0	0	0	0	0	0	0
CD4 T cell	0	0	0	0	0	0	0	0	0	0	0	1.265	2.2077
CD4 T cell	0	0	0	0	0	0	0	0	0	0	0	1.10537	6.85734
CD4 T cell	4.99769	0	0	0	0	0	0	0	0	0	0	0	0
CD4 T cell	0	0	0	0	0	0	0	0	0	0	0	0	9.42357
CD4 T cell	0	0	0	0	0	0	0	0	0	0	0	0	0
CD4 T cell	0	0	0	0	0	0	0	0	0	0	0	1.17293	0
CD4 T cell	0	0	0	0	0	0	0	0	0	0	0	0	7.16409
CD4 T cell	0	0	0	0	0	0	0	0	0	0	0	1.48921	2.46574
CD4 T cell	0	0	0	0	0	0	0	0	3.25592	0	0	0	0
CD4 T cell	0	0	0	1.91698	0	0	0	0	0	0	0	0	8.1364
CD4 T cell	0	0	0	0	0	0	0	0	0	0	0	0	2.60631
CD4 T cell	0	0	0	0	0	0	0	0	0	0	0	0	3.94945
CD4 T cell	0	0	0	0	0	0	0	0	0	0	0	1.4557	0
CD4 T cell	0	0	0	0	0	0	0	0	0	0	0	0	0
CD4 T cell	0	0	0	0	0	0	0	0	0	0	0	0	0
CD4 T cell	0	0	0	0	0	0	0	0	0	0	0	0	0
CD4 T cell	0	0	0	0	0	0	0	0	0	0	0	2.6774	0
CD4 T cell	0	0	0	0	0	0	0	0	0	0	0	1.34416	10.5558
CD4 T cell	0	6.19453	0	1.10802	0	0	0	0	0	0	0	0	0
CD4 T cell	0	0	0	0	0	0	0	0	0	0	0	1.24659	8.14644
CD4 T cell	0	0	0	0	0	0	0	0	0	0	0	1.82331	10.4157
CD4 T cell	0	0	0	5.94346	0	0	0	0	0	0	0	2.34122	1.55251
CD4 T cell	0	0	0	3.64874	0	0	0	0	0	0	0	1.30472	0
CD4 T cell	0	0	0	0	0	0	0	0	0	0	0	2.32676	8.17222
CD4 T cell	0	0	0	1.90791	0	0	0	0	0	0	0	0	0
CD4 T cell	0	0	0	2.17653	0	0	0	0	0	0	0	0	0
CD4 T cell	0	0	0	0	0	0	0	0	0	0	0	1.63532	0
CD4 T cell	0	0	0	0	0	0	0	0	0	0	0	0	0
CD4 T cell	0	0	0	0	0	0	0	0	0	0	0	0	9.08301
CD4 T cell	0	0	0	0	0	0	0	0	0	0	0	0	8.15621
CD4 T cell	0	0	0	0	0	0	0	0	0	0	0	0	9.70295
CD4 T cell	0	0	0	0	0	0	0	0	0	0	0	0	9.47136
CD4 T cell	3.52679	0	0	0	0	0	0	0	0	0	0	0	8.47576
CD4 T cell	3.07651	0	0	0	0	0	0	0	0	0	0	1.28296	0
CD4 T cell	0	0	0	0	0	0	0	0	0	0	0	0	0
CD4 T cell	0	0	0	0	0	0	0	0	0	0	0	0	0
CD4 T cell	0	0	0	0	0	0	0	0	0	0	0	0	9.99923
CD4 T cell	0	0	0	0	0	0	0	0	0	0	0	0	8.65227
CD4 T cell	0	0	0	0	0	0	0	0	0	8.69763	0	0	7.80077
CD4 T cell	0	0	0	0	0	0	0	0	0	0	0	1.46238	0
CD4 T cell	0	0	0	1.68467	0	0	0	0	0	0	0	3.05809	0
CD4 T cell	0	0	0	0	0	0	0	0	0	0	0	1.72213	7.95562
CD4 T cell	0	0	0	0	0	0	0	0	0	0	0	2.19779	8.84997
CD4 T cell	0	0	0	0	0	0	0	0	0	0	0	0	8.89364
CD4 T cell	0	0	0	0	0	0	0	0	0	0	0	2.24125	0
CD4 T cell	0	0	0	2.05718	0	0	0	0	0	0	0	0	0
CD4 T cell	0	0	0	0	0	0	0	0	0	0	0	2.14884	0
CD4 T cell	0	0	0	2.19542	0	0	0	0	0	0	0	0	0
CD4 T cell	3.05768	0	0	0	0	0	0	0	0	0	0	0	8.4804
CD4 T cell	0	0	0	0	0	0	0	0	0	0	0	0	8.12342
CD4 T cell	0	0	0	1.05182	0	0	0	0	0	0	0	2.18339	1.86596
CD4 T cell	0	0	0	0	0	0	0	0	0	0	0	0	0
CD4 T cell	0	0	0	0	0	0	0	0	0	0	0	1.2981	8.21379
CD4 T cell	0	0	0	0	0	0	0	0	0	0	0	0	0
CD4 T cell	0	0	0	0	0	0	0	0	0	0	0	0	8.11633
CD4 T cell	0	0	0	0	0	0	0	0	0	0	0	0	8.20243
CD4 T cell	0	0	0	1.00611	0	0	0	0	0	0	0	1.41824	0
CD4 T cell	0	0	0	1.89795	0	0	0	0	0	0	0	1.32463	0
CD4 T cell	0	0	0	0	0	0	0	0	2.67686	0	0	1.3201	0
CD4 T cell	0	0	0	0	0	0	0	0	0	0	0	0	0
CD4 T cell	0	0	0	0	0	0	0	0	0	0	0	0	0
CD4 T cell	3.27389	0	0	0	0	0	0	0	0	0	0	0	0
CD4 T cell	0	0	0	1.69947	0	0	0	0	0	0	0	0	2.46598
CD4 T cell	0	0	0	3.58951	0	0	0	0	0	0	0	0	0
CD4 T cell	0	0	0	0	0	0	0	0	0	0	0	0	3.24558
CD4 T cell	0	0	0	0	0	0	0	0	0	0	0	0	0
CD4 T cell	0	0	0	0	0	0	0	0	0	0	0	0	8.6734
CD4 T cell	0	0	0	0	0	0	0	0	0	0	0	0	0
CD4 T cell	0	0	0	0	0	0	0	0	0	0	0	1.38614	0
CD4 T cell	0	0	0	1.00135	0	0	0	0	0	0	0	1.41005	0
CD4 T cell	0	0	0	0	0	0	0	0	0	0	0	1.44014	7.74364
CD4 T cell	0	0	0	0	0	0	0	0	0	0	0	0	8.81197
CD4 T cell	0	0	0	0	0	0	0	0	0	0	0	1.42255	0
CD4 T cell	0	0	0	1.73161	0	3.46057	0	0	0	0	0	0	0
CD4 T cell	0	0	0	0	0	0	0	0	0	0	0	1.39582	7.95763
CD4 T cell	0	0	0	0.876263	0	0	0	0	0	0	0	0	10.5817
CD4 T cell	0	0	0	0	0	0	0	0	0	0	0	1.26124	0
CD4 T cell	3.06533	0	0	0	0	0	0	0	0	0	0	0	8.53289
CD4 T cell	0	0	0	8.76883	0	0	0	0	0	0	0	0	7.28278
CD4 T cell	0	0	0	0.929818	0	0	0	0	0	0	0	1.30144	6.13807
CD4 T cell	0	0	0	0	0	0	0	0	0	0	0	1.79811	8.16682
CD4 T cell	0	0	0	4.0044	0	0	0	0	0	0	9.70079	0	0
CD4 T cell	0	0	0	0	0	0	0	0	0	0	0	1.24592	9.03128
CD4 T cell	0	0	0	2.79725	0	0	0	0	0	0	0	0	9.29567
CD4 T cell	0	0	0	0	0	0	0	0	0	0	0	0	7.56633
CD4 T cell	0	0	0	0.977658	0	0	0	0	0	0	0	0	5.53293
CD4 T cell	0	0	0	0	0	0	0	0	0	0	0	1.85024	7.52792
CD4 T cell	5.63828	0	0	0	0	0	0	0	0	0	0	0	0
CD4 T cell	0	0	0	0	0	0	0	0	0	0	0	1.20333	8.71106
CD4 T cell	6.00804	0	0	0	0	0	0	0	0	0	0	0	0
CD4 T cell	0	0	0	0	0	0	0	0	0	0	0	0	0
CD4 T cell	0	0	0	0	0	0	0	0	0	0	0	0	0
CD4 T cell	0	0	0	0	0	0	0	0	0	0	0	1.36872	0
CD4 T cell	7.94261	0	0	0	0	0	0	0	0	0	0	2.04446	6.9139
CD4 T cell	0	0	0	0	0	0	0	0	0	0	0	0	7.08456
CD4 T cell	0	0	0	0	0	0	0	0	0	0	0	0	8.75645
CD4 T cell	4.20078	0	0	0	0	0	0	0	0	0	0	1.21863	0
CD4 T cell	0	0	0	1.75719	0	0	0	0	0	0	0	0	8.75111
CD4 T cell	0	0	0	0	0	0	0	0	0	0	0	0	9.47459
CD4 T cell	0	0	0	0	0	0	0	0	0	0	0	2.51664	8.88277
CD4 T cell	4.45356	0	0	0	0	0	0	0	0	0	0	0	9.35519
CD4 T cell	0	0	0	0	0	0	0	0	0	0	0	0	0
CD4 T cell	0	0	0	0	0	0	0	0	0	0	0	0	9.47956
CD4 T cell	0	0	0	1.56825	0	0	0	0	0	0	0	0	0
CD4 T cell	0	0	0	0	0	0	0	0	0	0	0	2.89344	7.50369
CD4 T cell	0.816576	0	0	0	0	0	0	0	0	0	0	3.40344	3.78399
CD4 T cell	0	0	0	0	0	0	0	0	0	0	0	2.96171	7.26166
CD4 T cell	0	0	0	0	0	0	0	0	2.8554	0	0	0	6.22839
CD4 T cell	0	0	0	0	0	0	0	0	0	0	0	0	0
CD4 T cell	6.95679	0	0	1.06033	0	0	0	0	0	0	0	3.9379	7.52944
CD4 T cell	0	0	0	0	0	0	0	0	0	0	0	0	0
CD4 T cell	4.99206	0	0	0	0	0	0	0	2.81565	0	0	2.10336	9.0817
CD4 T cell	5.20377	0	0	2.27608	0	0	0	0	0	0	0	0	8.35254
CD4 T cell	0	0	0	0	0	0	0	0	0	0	0	0	0
CD4 T cell	8.5606	0	0	0	0	0	0	0	0	0	0	0	0
CD4 T cell	0	0	0	0	0	0	0	0	0	0	0	0	3.03757
CD4 T cell	0	0	0	4.23705	0	0	0	0	0	0	0	1.7167	0
CD4 T cell	0	0	0	0	0	0	0	0	0	0	0	0	10.5078
CD4 T cell	0	0	0	0	0	0	0	0	0	0	0	0	1.75175
CD4 T cell	0	0	0	0	0	0	0	0	0	0	0	0	0
CD4 T cell	0	0	0	0	0	0	0	0	0	0	0	0	2.34623
CD4 T cell	0	0	0	0	0	0	0	0	0	0	0	1.24843	0
CD4 T cell	0	0	0	1.98212	0	0	0	0	0	0	0	0	10.7837
CD4 T cell	0	0	0	0	0	0	0	0	0	0	0	0	0
CD4 T cell	0	0	0	0	0	0	0	0	0	0	0	2.51492	0
CD4 T cell	0	0	0	0	0	0	0	0	0	0	0	0	10.3089
CD4 T cell	0	0	0	0	0	0	0	0	0	0	0	0	7.81317
CD4 T cell	0	0	0	0	0	0	0	0	0	0	0	1.43486	1.79352
CD4 T cell	0	0	0	0	0	0	0	0	0	0	0	0	0
CD4 T cell	0	0	0	0	0	0	0	0	0	0	0	1.35549	9.85254
CD4 T cell	0	0	0	0	0	0	0	0	0	0	0	0	0
CD4 T cell	0	0	0	0	0	0	0	0	0	0	0	1.38327	0
CD4 T cell	0	0	0	0	0	0	0	0	2.7049	0	0	0	9.63219
CD4 T cell	0	0	0	0	0	0	0	0	0	0	0	0	0
CD4 T cell	0	0	0	0	0	0	0	0	0	0	0	0	10.2237
CD4 T cell	0	0	0	0	0	0	0	0	0	0	0	0	0
CD4 T cell	0	0	0	0	0	0	0	0	0	0	0	1.25481	0
CD4 T cell	3.3183	0	0	0	0	0	0	0	0	0	0	0	0
CD4 T cell	0	0	0	0	0	0	0	0	0	0	0	1.46053	0
CD4 T cell	0	0	0	0	0	0	0	0	0	0	0	1.89786	9.94324
CD4 T cell	0	0	0	0	0	0	0	0	0	0	0	0	0
CD4 T cell	0	0	0	0	0	0	0	0	0	0	0	0	1.67384
CD4 T cell	0	0	0	0	0	0	0	0	0	0	0	0	10.4053
CD4 T cell	0	0	0	2.91456	0	0	0	0	0	0	0	0	9.07181
CD4 T cell	0	0	0	0	0	0	0	0	0	0	0	0	8.37883
CD4 T cell	0	0	0	0	0	0	0	0	0	0	0	0	0
CD4 T cell	0	0	0	0	0	0	0	0	2.24097	0	0	0	0
CD4 T cell	0	0	0	0	0	0	0	0	0	0	0	0	7.80224
CD4 T cell	3.31098	0	0	0	0	0	0	0	0	0	0	0	0
CD4 T cell	0	0	0	1.55911	0	0	0	0	0	0	0	0	0
CD4 T cell	0	0	0	0	0	0	0	0	0	0	0	0	1.68858
CD4 T cell	0	0	0	0	0	0	0	0	0	0	0	1.15708	0
CD4 T cell	3.17077	0	0	0	0	0	0	0	0	0	0	1.87014	0
CD4 T cell	4.21014	0	0	0	0	0	0	0	4.18615	0	0	0	3.10748
CD4 T cell	0	0	0	0	0	0	0	0	0	0	0	0	0
CD4 T cell	0	0	0	0	0	0	0	0	0	0	0	0	0
CD4 T cell	3.34371	0	0	0	0	0	0	2.04739	0	0	0	0	9.06713
CD4 T cell	0	0	0	0	0	0	0	0	0	0	0	1.47992	0
CD4 T cell	0	0	0	9.79755	0	0	0	0	0	0	0	2.23715	0
CD4 T cell	0	0	0	0	0	0	0	0	0	0	0	0	0
CD4 T cell	0	0	0	0	0	0	0	0	0	0	0	2.36449	0
CD4 T cell	0	0	0	0	0	0	0	0	0	0	0	0	9.13275
CD4 T cell	0	0	0	0	0	0	0	0	0	0	0	0	1.72867
CD4 T cell	3.48071	0	0	0	0	0	0	0	0	0	0	2.53392	0
CD4 T cell	0	0	0	1.02736	0	0	0	0	0	0	0	0	0
CD4 T cell	0	0	0	0	0	0	0	0	0	0	0	0	0
CD4 T cell	0	0	0	0	0	0	0	0	0	0	0	0	3.77399
CD4 T cell	0	0	0	0	0	0	0	0	0	0	0	0	0
CD4 T cell	0	0	0	0	0	0	0	0	0	0	0	0	0
CD4 T cell	0	0	0	0	0	0	0	0	0	0	0	0	0
CD4 T cell	0	0	0	0	0	0	0	0	0	0	0	1.50336	0
CD4 T cell	4.09891	0	0	0	0	0	0	0	0	0	0	0	3.43076
CD4 T cell	3.38972	0	0	0	0	0	0	0	0	0	0	0	0
CD4 T cell	0	0	0	0	0	0	0	0	3.10423	0	0	2.35904	0
CD4 T cell	6.43075	0	0	0	0	0	0	0	0	0	0	1.46947	0
CD4 T cell	0	0	0	0	0	0	0	0	0	0	0	1.62665	8.86112
CD4 T cell	6.65125	0	0	0	0	0	0	0	0	0	0	0	0
CD4 T cell	0	0	0	1.09816	0	0	0	0	0	0	0	0	7.24989
CD4 T cell	4.91975	0	0	0	0	0	0	0	0	0	0	0	0
CD4 T cell	0	0	0	0	0	0	0	0	0	0	0	0	0
CD4 T cell	0	0	0	0	0	0	0	0	0	0	0	1.1573	5.64263
CD4 T cell	0	0	0	9.09867	0	0	0	0	0	0	0	0	0
CD4 T cell	0	0	0	0	0	0	0	0	0	0	0	0	9.04933
CD4 T cell	0	0	0	0	0	0	0	0	3.68071	0	0	1.3971	0
CD4 T cell	0	0	0	0	0	0	0	0	0	0	0	1.36786	3.20678
CD4 T cell	0	0	0	2.21691	0	0	0	0	0	0	0	0	0
CD4 T cell	0	0	0	0	0	0	0	0	0	0	0	0	8.92444
CD4 T cell	0	0	0	0	0	0	0	0	0	0	0	4.12402	0
CD4 T cell	4.14633	0	0	0	0	0	0	0	0	0	0	0	0
CD4 T cell	2.34443	0	0	0	0	0	0	0	0	0	0	0	9.14636
CD4 T cell	0	0	0	0	0	0	0	0	0	0	0	0	8.64838
CD4 T cell	0	0	0	0	0	0	0	0	0	0	0	0	0
CD4 T cell	0	0	0	0	0	0	0	0	0	0	0	0	0
CD4 T cell	0	0	0	2.42349	0	0	0	0	0	0	0	2.41402	0
CD4 T cell	0	0	0	0	0	0	0	0	0	0	0	0	0
CD4 T cell	0	0	0	0	0	0	0	0	0	0	0	1.93397	0
CD4 T cell	0	0	0	2.15151	0	0	0	0	0	0	0	0	0
CD4 T cell	0	0	0	0	0	0	0	0	0	0	0	0.650415	1.96081
CD4 T cell	3.18869	0	0	0	0	0	0	0	0	0	0	0.763381	1.83029
CD4 T cell	0	0	0	0	0	0	0	0	1.7168	0	0	0	0
CD4 T cell	1.50496	0	0	0	0	0	0	0	0	0	0	0.942792	3.64152
CD4 T cell	0	0	0	0	0	0	0	0	0	2.57583	0	0.608285	0
CD4 T cell	5.61764	0	0	0	0	0	0	0	0	1.8945	0	1.38368	5.06665
CD4 T cell	0	0	0	0	0	0	0	0	3.02227	0	0	0	0
CD4 T cell	0	0	0	0	0	0	0	0	0	0	0	0	4.15179
CD4 T cell	2.51352	0	0	0	0	0	0	0	0	4.03042	0	0	0
CD4 T cell	0	0	0	0.491402	0	0	0	9.14294	0	3.60972	0	1.67462	2.71351
CD4 T cell	0	0	0	3.78054	0	0	0	0	0	0	0	1.23798	2.84774
CD4 T cell	0	0	0	2.45215	0	0	0	0	0	3.89316	0	0.821043	0
CD4 T cell	2.27639	0	0	1.96771	0	0	0	0	0	2.07186	0	0	0
CD4 T cell	0	0	0	0	0	0	0	0	0	2.03666	0	1.49681	9.50245
CD4 T cell	0	0	0	0	0	0	0	0	0	0	0	0	3.42586
CD4 T cell	0	0	0	0	0	0	0	0	0	2.65833	0	0	0
CD4 T cell	1.70834	0	0	0	0	0	0	0	0	0	0	2.94548	0
CD4 T cell	0	0	0	0	0	0	0	0	0	0	0	1.35655	8.84595
CD4 T cell	0	0	0	0	0	0	0	0	0	3.39295	0	0.648455	0
CD4 T cell	0	0	0	2.70091	0	0	0	0	0	5.92294	0	0	9.48364
CD4 T cell	3.86256	0	0	2.53987	0	4.76011	0	0	0	3.38759	0	1.78272	4.73805
CD4 T cell	3.59723	0	0	7.97713	0	0	0	0	0	4.31368	0	1.19989	4.44518
CD4 T cell	3.12038	0	0	1.75402	0	0	0	8.38563	0	4.37095	0	0.867899	0
CD4 T cell	0	0	0	0	0	0	0	0	0	3.27251	0	0	2.91258
CD4 T cell	0	0	0	0	0	0	0	8.02818	0	0	0	0.680091	3.96991
CD4 T cell	0	0	0	0	0	0	0	8.61525	0	3.24252	0	0	0
CD4 T cell	0	0	0	0	0	0	0	0	0	4.38566	0	1.88544	0
CD4 T cell	0	1.79257	0	0.717174	0	0	0	0	0	4.48462	0	2.32473	1.95779
CD4 T cell	0	0	0	1.11119	0	0	0	0	2.57883	2.38267	0	0.711142	8.4412
CD4 T cell	0	0	0	3.24934	0	0	0	0	0	4.17054	0	2.06096	5.13631
CD4 T cell	0	0	0	2.76792	0	4.90078	0	0	1.5766	1.57444	0	1.10189	8.7466
CD4 T cell	6.68346	0	0	2.23039	0	0	0	8.10196	0	1.70835	0	0.772712	4.34215
CD4 T cell	0	0	6.43891	0	0	0	0	0	0	3.06291	0	0	3.49945
CD4 T cell	0	0	0	0	0	0	0	0	0	2.57179	0	0.474786	2.28342
CD4 T cell	0	0	0	0	0	0	0	0	0	0	0	1.49129	3.08965
CD4 T cell	0	0	0	0	0	0	0	0	0	2.86561	0	0	2.50813
CD4 T cell	0	0	0	0	0	0	0	0	1.91455	1.27923	0	0	1.60902
CD4 T cell	3.24693	0	0	2.36771	0	0	0	0	0	0	0	2.0735	0
CD4 T cell	0	0	0	0	0	0	0	0	0	2.24665	0	1.12459	2.53883
CD4 T cell	0	0	0	1.12316	0	0	0	8.19743	0	0	0	0	3.72066
CD4 T cell	3.46525	0	0	0	0	0	0	0	0	0	0	0.61961	9.60331
CD4 T cell	0	0	0	0	0	0	0	0	0	1.82782	0	0	9.46121
CD4 T cell	1.72595	0	0	0	0	0	0	0	0	3.48117	0	0	2.65875
CD4 T cell	0	0	0	1.28349	0	0	0	0	0	0	0	0.979095	7.84264
CD4 T cell	2.02899	0	0	0	0	0	0	0	0	0	0	1.19117	0
CD4 T cell	0	0	0	0.418594	0	0	0	0	0	0	0	2.21176	3.82092
CD4 T cell	1.49436	0	0	2.00014	0	0	0	0	0	2.87327	0	0	0
CD4 T cell	0	0	0	1.34346	0	0	0	0	0	4.44465	0	0.56163	0
CD4 T cell	0	0	0	0	0	0	0	0	0	0	0	1.17807	10.2908
CD4 T cell	0	0	0	1.90578	0	0	0	0	0	3.0899	0	0.891944	0
CD4 T cell	0	0	0	2.08949	0	0	0	0	0	1.55083	0	0	7.73166
CD4 T cell	1.70462	0	0	2.29335	0	0	0	0	0	2.14298	0	1.05431	8.17509
CD4 T cell	0	0	0	3.18538	0	0	0	0	0	2.65151	0	0	2.27607
CD4 T cell	0	0	0	0	0	0	0	0	0	0	0	2.8427	2.22764
CD4 T cell	0	0	0	0	0	0	0	0	0	0	0	8.31687	2.73627
CD4 T cell	2.49927	0	0	0	0	0	0	0	0	0	0	0	7.17146
CD4 T cell	0	0	0	0	0	0	0	0	0	0	0	0.726488	7.15458
CD4 T cell	0	0	0	0	0	0	0	0	0	0	0	0.260174	0
CD4 T cell	1.60382	0	0	0	0	0	0	0	3.87542	0	0	0	1.92224
CD4 T cell	0	0	0	0.272821	0	0	0	0	0	0	0	2.18296	0
CD4 T cell	0	0	0	0	0	0	0	0	0	0	0	10.486	5.79042
CD4 T cell	0	0	0	0	0	0	0	0	0	0	0	0	8.68416
CD4 T cell	1.86631	0	0	0	0	0	0	0	0	0	0	0.682393	8.06719
CD4 T cell	0	0	0	2.97382	0	0	0	0	0	0	0	1.07908	9.84283
CD4 T cell	0.324194	0	0	0.380343	0	0	0	0	0	0	0	0.620415	8.81581
CD4 T cell	0	0	0	5.04301	0	0	0	0	3.82095	0	0	0.808039	7.31839
CD4 T cell	0	0	0	0	0	0	0	0	0	0	0	0	0
CD4 T cell	0	0	0	0	0	0	0	0	0	0	0	1.02138	7.304
CD4 T cell	0	0	0	0	0	0	0	0	0	0	0	1.00056	2.45738
CD4 T cell	0	0	0	0.674104	0	0	0	0	0	0	0	10.7754	8.24118
CD4 T cell	0	0	0	0	0	0	0	0	0	0	0	0.722116	0
CD4 T cell	0	0	0	9.10154	0	0	0	0	0	0	0	0	0
CD4 T cell	0	0	0	1.99427	0	0	0	0	0	0	0	1.37686	0
CD4 T cell	0	0	0	0	0	0	0	0	0	0	0	1.05521	2.46884
CD4 T cell	2.47635	0	0	1.54778	0	0	0	0	0	0	0	0	0
CD4 T cell	0	0	0	0	0	0	0	0	0	0	0	1.09936	0
CD4 T cell	0	0	0	8.25765	0	0	0	0	0	0	0	1.38555	0
CD4 T cell	1.83461	0	0	0	0	0	0	0	0	0	0	0	0
CD4 T cell	4.822	0	0	0	0	0	0	0	0	0	0	0	0
CD4 T cell	1.5272	0	0	0.82153	0	0	0	0	0	0	0	6.47135	7.60253
CD4 T cell	0	0	0	0	0	0	0	0	0	0	0	1.28281	0
CD4 T cell	1.672	0	0	0.366481	0	0	0	0	0	0	0	0	0
CD4 T cell	0	0	0	0	0	0	0	0	0	0	0	0.961335	8.59955
CD4 T cell	0	0	0	0	0	0	0	0	0	0	0	0.669187	1.64872
CD4 T cell	0	0	0	0	0	0	0	0	0	0	0	0	10.2487
CD4 T cell	1.65596	0	0	0	0	0	0	0	0	0	0	1.27073	0
CD4 T cell	0	0	0	0	0	0	0	0	0	0	0	0.739109	0
CD4 T cell	0	3.84767	0	0	0	0	0	0	0	0	0	1.25804	8.32013
CD4 T cell	0	0	0	0	0	0	0	0	0	0	0	1.14936	0
CD4 T cell	0	0	0	0.834539	0	0	0	0	0	0	0	0	0
CD4 T cell	0	0	0	1.23749	0	0	0	0	0	0	0	1.06352	0
CD4 T cell	2.86307	0	0	0	0	0	0	0	0	0	0	0	0
CD4 T cell	0	0	0	0	0	0	0	0	0	0	0	0.507651	9.31566
CD4 T cell	0	0	0	0.462789	0	0	0	0	0	0	0	0	0
CD4 T cell	0	0	0	0.39184	0	0	0	0	1.52369	0	0	0.637207	2.7173
CD4 T cell	0	0	0	0	0	0	0	0	0	0	0	0	10.7504
CD4 T cell	0	0	0	0	0	0	0	0	0	0	0	0.568102	8.5498
CD4 T cell	0	0	0	0	0	0	0	0	0	0	0	0.565762	10.8035
CD4 T cell	0	0	0	0	0	0	0	0	0	0	0	0	0
CD4 T cell	0	0	0	0	0	0	0	0	0	0	0	0.583248	0
CD4 T cell	0	0	0	0	0	0	0	0	0	0	0	0	0
CD4 T cell	1.74786	0	0	0.656542	0	0	0	0	0	0	0	2.49008	0
CD4 T cell	1.48713	0	0	1.35911	0	0	0	0	0	0	0	0.968182	8.90807
CD4 T cell	3.11995	0	0	0	0	0	0	0	0	0	0	0	7.48425
CD4 T cell	2.06966	0	0	0	0	0	0	0	0	0	0	0.441762	10.6753
CD4 T cell	4.57028	0	0	0	0	0	0	0	0	0	0	0.962444	2.76025
CD4 T cell	0	0	0	0	0	0	0	0	0	0	0	0.682579	9.97042
CD4 T cell	0	0	0	0	0	0	0	0	0	0	0	0.481017	2.30691
CD4 T cell	0	0	0	0	0	0	0	0	0	0	0	0.424225	0
CD4 T cell	0	0	0	0	0	0	0	0	0	0	0	1.13403	8.30045
CD4 T cell	0	0	0	0	0	0	0	0	0	0	0	0	2.42664
CD4 T cell	1.21929	0	0	1.29121	0	0	0	0	0	0	0	0.759181	8.74434
CD4 T cell	0	0	0	0	0	0	0	0	0	0	0	0	11.6209
CD4 T cell	3.67972	0	0	0	0	0	0	0	0	0	0	0.431555	10.9328
CD4 T cell	3.93632	0	0	0	0	0	0	0	0	0	0	0.402818	1.42071
CD4 T cell	0	3.60352	0	0	0	0	0	0	0	0	0	0.99083	8.01148
CD4 T cell	0	0	0	0	0	0	0	0	0	0	0	1.03	0
CD4 T cell	0	0	0	0	0	0	0	0	0	4.17299	0	0.504921	0
CD4 T cell	2.75354	0	0	0	0	0	0	0	0	0	0	0	8.20536
CD4 T cell	0	0	0	0	0	0	0	0	0	0	0	1.60527	0
CD4 T cell	0.0789342	0	0	0	0	0	0	0	0	0	0	0.412477	8.9686
CD4 T cell	0	0	0	0	0	0	0	0	0	0	0	0.516486	0
CD4 T cell	0	0	0	0	0	0	0	0	1.76893	0	0	0.42521	8.81931
CD4 T cell	1.27952	0	0	0	0	0	0	0	0	0	0	1.16605	9.49921
CD4 T cell	0	0	0	0	0	0	0	0	0	0	0	1.49924	2.00331
CD4 T cell	0	0	0	1.08514	0	0	0	0	0	0	0	0.422792	9.49335
CD4 T cell	0	0	0	0	0	0	0	0	4.18327	0	0	0	10.8457
CD4 T cell	0	0	0	0	0	0	0	0	0	0	0	0	8.71239
CD4 T cell	0	0	0	0	0	0	0	0	0	0	0	0.491976	0
CD4 T cell	1.86362	0	0	0	0	0	0	0	0	0	0	0.397856	8.8112
CD4 T cell	0	0	0	1.96204	0	0	0	0	0	0	0	0	8.1025
CD4 T cell	0	0	0	0	0	0	0	0	0	0	0	0	9.50732
CD4 T cell	3.62845	0	0	0	0	0	0	0	0	0	0	0	6.99071
CD4 T cell	0	0	0	2.43026	0	0	0	0	1.09519	0	0	0.738661	10.9534
CD4 T cell	1.52875	4.06152	0	3.18575	0	0	0	0	0	0	0	0.448714	0
CD4 T cell	0.958817	0	6.23183	0.195848	0	0	0	0	0	0	0	0.332246	7.6108
CD4 T cell	0	0	0	0	0	0	0	0	0	0	0	0.476062	8.13206
CD4 T cell	0	0	0	0	0	0	0	0	0	0	0	0.391285	2.79238
CD4 T cell	1.69086	0	0	0	0	0	0	0	0	0	0	0.952278	8.67247
CD4 T cell	0	0	0	0	0	0	0	0	0	0	0	0	2.19645
CD4 T cell	0	0	0	0.481356	0	0	0	0	1.06386	0	0	1.6487	0
CD4 T cell	0	0	0	0	0	0	0	0	0	0	0	2.24899	0
CD4 T cell	0	0	0	0	0	0	0	0	0	0	0	0	0
CD4 T cell	0	0	0	1.21463	0	0	0	0	0	0	0	0.48418	8.18367
CD4 T cell	0	0	0	1.76387	0	0	0	0	0	0	0	0.414867	7.80659
CD4 T cell	4.46086	5.18223	0	0	0	0	0	0	4.34315	0	0	2.40925	10.2321
CD4 T cell	2.2854	2.56236	0	0	0	0	0	0	0	0	0	0	8.53067
CD4 T cell	2.6666	0	0	0	0	0	0	0	0	0	0	0	0
CD4 T cell	0.950705	0	0	0	0	0	0	0	2.06074	0	6.26796	0	0
CD4 T cell	0	0	0	0	0	0	0	0	1.28739	0	0	1.23576	11.0768
CD4 T cell	0	0	0	1.34675	0	0	0	0	0	0	0	2.30485	0
CD4 T cell	0	0	0	0	0	0	0	0	0	0	0	0.888419	2.25751
CD4 T cell	3.79968	0	0	0.764602	0	0	0	0	0	0	0	0	9.50179
CD4 T cell	0	0	0	0	0	0	0	0	0	0	0	0.798243	10.7895
CD4 T cell	0	0	0	0	0	0	0	0	0	0	0	0.664397	0
CD4 T cell	2.46354	0	0	0	0	0	0	0	0	0	0	2.64817	2.40337
CD4 T cell	0.555701	0	0	0.356333	0	0	0	0	0	0	0	0.582284	2.60563
CD4 T cell	3.31702	0	0	7.29977	0	0	0	0	0	0	0	0.953703	8.17663
CD4 T cell	2.49018	0	0	0.315996	0	0	0	0	0	0	0	1.06446	8.04382
CD4 T cell	0	0	0	2.28568	0	0	0	0	0	0	0	1.78594	2.56308
CD4 T cell	0	0	0	0.3555	0	0	0	0	0	0	0	0	0
CD4 T cell	0	0	0	0	0	0	0	0	0	0	0	0	2.6283
CD4 T cell	0	4.46737	0	0	0	0	0	0	0	0	0	0	8.99876
CD4 T cell	0	0	0	0.733147	0	0	0	0	0	0	0	1.46794	8.26034
CD4 T cell	1.63896	0	0	0	0	0	0	0	0	2.36786	0	1.85673	7.95751
CD4 T cell	3.09509	0	0	1.04707	0	0	0	0	0	0	0	1.86541	1.58727
CD4 T cell	0	0	0	0	0	0	0	0	0	0	0	1.43985	10.6887
CD4 T cell	0	0	0	0	0	0	0	0	1.90887	0	0	1.03553	8.09489
CD4 T cell	3.23699	0	0	2.89718	0	0	0	0	0	0	0	0.860989	2.4196
CD4 T cell	0	0	0	0.913534	0	0	0	0	0	0	0	1.35956	0
CD4 T cell	0	0	0	3.0411	0	0	0	0	0	0	0	0.59697	10.2276
CD4 T cell	2.30028	0	0	0	0	0	0	0	0	0	0	1.645	1.91092
CD4 T cell	0	0	0	0	0	0	0	0	0	0	0	1.55816	1.83266
CD4 T cell	2.2529	0	0	0	0	0	0	0	0	0	0	1.54867	10.8837
CD4 T cell	2.18803	0	0	0	0	0	0	0	1.16305	0	0	0	1.49091
CD4 T cell	0	0	0	1.9481	0	0	0	0	0	0	0	1.33381	0
CD4 T cell	0	0	0	0	0	0	0	0	0	0	0	0	0
CD4 T cell	0	0	0	0.312243	0	0	0	0	1.3319	0	0	0	9.52625
CD4 T cell	1.2338	0	0	0.962258	0	0	0	0	0	0	0	0.879633	8.69003
CD4 T cell	2.79428	0	0	0	0	0	0	0	0	0	0	0.660239	0
CD4 T cell	2.5642	0	0	0	0	0	0	0	0	0	0	0.5709	4.29874
CD4 T cell	0	0	0	0	0	0	0	0	0	0	0	1.07675	0
CD4 T cell	0	0	0	0	0	0	0	0	0	0	0	1.08143	9.05178
CD4 T cell	1.47455	0	0	0	0	0	0	0	0	0	0	0.756868	0
CD4 T cell	3.19728	0	0	0	0	0	0	0	0	0	0	1.29685	8.54568
CD4 T cell	3.7684	0	0	0.547463	0	0	0	0	0	0	0	0.862274	0
CD4 T cell	0	0	0	0	0	0	0	0	0	0	0	2.02053	8.26562
CD4 T cell	0	0	0	0	0	0	0	0	0	0	0	0.985521	6.64885
CD4 T cell	0	0	0	0	0	0	0	0	0	0	0	0.717636	0
CD4 T cell	0	0	0	0	0	0	0	0	0	0	0	1.50671	7.71221
CD4 T cell	0	0	0	0	0	0	0	0	0	0	0	1.04306	0
CD4 T cell	3.0226	0	0	0	0	0	0	0	0	0	0	1.0034	0
CD4 T cell	0	0	0	0.945111	0	0	0	0	0	8.29202	0	3.11872	7.49566
CD4 T cell	5.11291	0	0	1.59479	0	0	0	0	0	0	0	0.677037	0
CD4 T cell	1.69722	0	0	0	0	0	0	0	0	0	0	1.13629	0
CD4 T cell	0	0	0	0	0	0	0	0	0	0	0	1.26357	0
CD4 T cell	0	0	0	0.958886	0	0	0	0	0	0	0	1.08278	9.95622
CD4 T cell	0	0	0	0	0	0	0	0	0	0	0	2.42435	0
CD4 T cell	0	0	0	0	0	0	0	0	0	0	0	0.606151	9.3399
CD4 T cell	0	0	0	0	0	0	0	0	0	0	0	2.47275	8.90157
CD4 T cell	0	0	0	0	0	0	0	0	0	0	0	1.5905	2.13105
CD4 T cell	0.41249	0	0	5.02681	0	0	0	0	0	0	0	0	8.48696
CD4 T cell	0	0	0	4.0949	0	0	0	0	0	0	0	1.42648	8.87331
CD4 T cell	0	0	0	0	0	0	0	0	0	0	0	1.0338	1.66412
CD4 T cell	0	0	0	0	0	0	0	0	0	0	0	0	0
CD4 T cell	1.72793	0	0	0	0	0	0	0	0	0	0	1.75404	9.97777
CD4 T cell	0	0	0	0	0	0	0	0	2.38879	0	0	2.16091	0
CD4 T cell	0	0	0	7.18453	0	0	0	0	0	0	0	0.628718	0
CD4 T cell	3.69428	0	0	0	0	0	0	0	0	0	0	0.768548	0
CD4 T cell	3.39175	0	0	0	0	0	0	0	0	0	0	1.53123	0
CD4 T cell	4.15184	0	0	2.27822	0	0	0	0	0	0	0	0	8.06382
CD4 T cell	3.93118	0	0	2.02212	0	0	0	0	0	0	0	1.06289	8.1594
CD4 T cell	7.4137	0	0	0	0	0	0	0	0	0	0	0.617424	7.75871
CD4 T cell	0	0	0	0.710107	0	0	0	0	0	0	0	0	7.09758
CD4 T cell	0	0	0	0	0	0	0	0	0	0	0	1.07325	0
CD4 T cell	0	0	0	0	0	0	0	0	0	0	0	0	6.91957
CD4 T cell	0	0	0	0	0	0	0	0	0	0	0	0	7.96051
CD4 T cell	1.99562	0	0	1.17378	0	0	0	0	0	0	0	1.27094	3.79492
CD4 T cell	0	0	0	2.25032	0	0	0	0	2.33042	0	0	0	0
CD4 T cell	0	0	0	0	0	0	0	0	0	0	0	0.579934	2.47682
CD4 T cell	0	0	0	0	0	0	0	0	0	0	0	1.02711	0
CD4 T cell	0	0	0	0	0	0	0	0	0	0	0	0.534076	4.3334
CD4 T cell	0	0	0	0	0	0	0	0	1.32341	0	0	0.83956	2.15408
CD4 T cell	0	0	0	0	0	0	0	0	0	0	0	0	0
CD4 T cell	4.22009	0	0	0	0	0	0	0	0	0	0	1.20761	7.47668
CD4 T cell	0	0	0	0	0	0	0	0	0	0	0	0	10.7099
CD4 T cell	0	0	0	0	0	0	0	0	0	0	0	1.19427	4.46922
CD4 T cell	0	0	0	0	0	0	0	0	1.06893	0	0	0	8.78143
CD4 T cell	0	0	0	0	0	0	0	0	0	0	0	0	2.31852
CD4 T cell	0	0	0	0	0	0	0	0	0	0	0	0.771524	9.21277
CD4 T cell	0	0	0	0	0	0	0	0	0	0	0	2.19011	10.5628
CD4 T cell	1.94008	0	0	1.43101	2.84268	0	0	0	0	0	0	1.19349	7.91586
CD4 T cell	1.5226	0	0	0	0	0	0	0	0	0	0	0	0
CD4 T cell	0	0	0	0	0	0	0	0	0	0	0	0	8.1384
CD4 T cell	0	0	0	1.32163	0	0	0	0	0	0	0	2.0425	7.95674
CD4 T cell	0	0	0	0	0	0	0	0	2.06168	0	0	0	8.94614
CD4 T cell	0.530251	0	0	0.615524	0	0	0	0	0	0	0	0	10.4525
CD4 T cell	0	0	0	0	0	0	0	0	0	0	0	1.21186	0
CD4 T cell	2.50441	0	0	0	0	0	0	0	0	0	0	0.10249	0
CD4 T cell	0	0	0	1.08238	0	0	0	0	0	0	0	0.119717	8.13581
CD4 T cell	0	0	0	8.6055	0	0	0	0	0	0	0	0.103094	0
CD4 T cell	0	0	0	1.98076	0	0	0	0	0	0	0	5.48681	0
CD4 T cell	0	0	0	1.40271	0	0	0	0	0	0	0	0.310864	0
CD4 T cell	0	0	0	0	0	0	0	0	0	0	0	0.125201	3.79563
CD4 T cell	0	0	0	0	0	0	0	0	0	0	0	0	1.81362
CD4 T cell	3.02995	0	0	0	0	0	0	0	0	0	0	0.495392	0
CD4 T cell	0	0	0	0	0	0	0	0	0	0	0	0.0835165	0
CD4 T cell	4.50633	0	0	0.491178	0	0	0	0	1.87466	0	0	0	9.68822
CD4 T cell	5.28102	0	0	0	0	0	0	0	0	1.87549	0	0.11223	0
CD4 T cell	0	0	0	0	0	0	0	0	1.77528	0	0	0.119047	0
CD4 T cell	0	0	0	7.60576	0	0	0	0	0	0	0	0	8.62643
CD4 T cell	0	0	0	0	0	0	0	0	0	0	0	0.250518	0
CD4 T cell	0	0	0	0	0	0	0	0	0	0	0	0.125425	2.7553
CD4 T cell	0	0	0	0	0	0	0	0	0	0	0	0.116649	0
CD4 T cell	1.75742	0	0	0	0	0	0	0	0	0	0	0.105162	10.0746
CD4 T cell	2.1592	0	0	0	0	0	0	0	0	0	0	0.0962008	1.71144
CD4 T cell	0	0	0	2.49251	0	0	0	0	0	0	0	0	0
CD4 T cell	0	0	0	1.45127	0	0	0	0	0	0	0	0.113447	0
CD4 T cell	0	0	0	1.75785	0	0	0	0	0	0	0	0.107226	0
CD4 T cell	0	0	0	0	0	0	0	0	0	0	0	0.37493	0
CD4 T cell	0	0	0	0	0	0	0	0	0	0	0	0	0
CD4 T cell	0	0	0	0	0	0	0	0	2.3938	0	0	1.41828	0
CD4 T cell	0	0	0	0	0	0	0	0	0	0	0	0.35626	0
CD4 T cell	1.4861	0	0	0	0	0	0	0	0	0	0	0	0
CD4 T cell	0	0	0	0	0	0	0	0	0	0	0	0.0756381	0
CD4 T cell	1.62607	0	0	2.49606	0	0	0	0	0	0	0	0	10.1856
CD4 T cell	4.14124	0	0	0.759091	0	0	0	0	0	0	0	0.406511	9.8518
CD4 T cell	0	0	0	1.20732	0	0	0	0	0	0	0	0	0
CD4 T cell	0	0	0	0.871482	0	0	0	0	0	0	0	0.134628	0
CD4 T cell	1.58848	0	0	5.19733	0	0	0	0	0	0	0	0.366244	0
CD4 T cell	0	0	0	0	0	0	0	0	0	0	0	0	1.61646
CD4 T cell	0	0	0	0	0	0	0	0	0	0	0	0.193459	8.98795
CD4 T cell	0	0	0	0	0	0	0	0	0	0	0	0	0
CD4 T cell	0	0	0	1.48084	0	0	0	0	0	0	0	0.0744506	10.0759
CD4 T cell	0	0	0	0	0	0	0	0	0	2.17129	0	0	2.61589
CD4 T cell	0	0	0	1.81926	0	0	0	0	0	0	0	0	0
CD4 T cell	0	0	0	0	0	0	0	0	0	0	0	0.198158	8.51473
CD4 T cell	0	0	0	0	0	0	0	0	0	0	0	0.197315	0
CD4 T cell	2.79074	0	0	0	0	0	0	0	0	1.28884	0	0	0
CD4 T cell	2.38363	0	0	0	0	0	0	0	0	0	0	0.123956	0
CD4 T cell	0	0	0	0	0	0	0	0	0	0	0	0.0831151	0
CD4 T cell	0	0	0	2.46124	0	0	0	0	0	0	0	0.134604	2.03306
CD4 T cell	0	0	0	0.337852	0	0	0	0	0	0	0	0.169428	8.45328
CD4 T cell	0	0	0	0	0	0	0	0	0	0	0	0	3.35269
CD4 T cell	0	0	0	0.904203	0	0	0	0	0	0	0	0.141719	10.7737
CD4 T cell	0	0	0	0	0	0	0	0	0	0	0	0.123647	0
CD4 T cell	0	0	0	0	0	0	0	0	0	0	0	0	0
CD4 T cell	0	0	0	0.526651	0	0	0	0	3.15959	0	0	0	0
CD4 T cell	0	0	0	0	0	0	0	0	2.66858	0	0	6.717	0
CD4 T cell	3.03717	0	0	0.982297	0	0	0	0	0	0	0	0.435031	2.47244
CD4 T cell	0	0	0	3.65766	0	0	0	0	0	0	0	0.123395	10.3991
CD4 T cell	1.7508	0	0	0.575661	0	0	0	0	0	0	0	0	0
CD4 T cell	0	0	0	0	0	0	0	0	0	0	0	0.116606	10.6837
CD4 T cell	1.37452	0	0	0	0	0	0	0	0	0	0	0	0
CD4 T cell	2.63148	0	0	2.04476	0	0	0	0	2.23372	0	0	0.82456	8.76037
CD4 T cell	0	0	0	1.55911	0	0	0	0	0	0	0	0.653455	2.91263
CD4 T cell	3.75416	0	0	2.47349	0	0	0	0	0	0	0	0.627038	5.0361
CD4 T cell	0	0	0	0	0	0	0	0	0	0	0	0.295078	0
CD4 T cell	0	0	0	0	0	0	0	0	0	0	0	0.135933	0
CD4 T cell	3.26901	0	0	0.94048	0	0	0	0	0	2.30216	0	0.143136	0
CD4 T cell	4.33314	0	0	0	0	0	0	0	0	0	0	0.100201	9.93757
CD4 T cell	0	0	0	0	0	0	0	0	0	0	0	0.220994	0
CD4 T cell	0	0	0	4.09292	0	0	0	0	0	0	0	0	2.56283
CD4 T cell	0	0	0	4.31105	4.58061	0	0	0	0	2.27626	0	1.85424	4.00379
CD4 T cell	0	0	0	0	0	0	0	0	0	0	0	0.332983	8.32746
CD4 T cell	0	0	0	0.399761	0	2.39735	0	0	0	0.884586	0	1.57601	0
CD4 T cell	0.667587	0	0	0	0	0	0	0	0	0	0	0.705587	4.43411
CD4 T cell	0	0	2.92015	0	0	0	0	0	0	0	0	1.50632	0
CD4 T cell	2.09131	0	0	0	0	0	0	0	0	0	0	0.716123	2.6839
CD4 T cell	4.24916	0	0	0	0	2.698	0	0	0	0	0.748321	1.77469	4.19111
CD4 T cell	6.13274	0	0	0	0	0	0	0	0	0	0	5.36551	0
CD4 T cell	0	0	0	0.523909	0	0	0	0	0	0	0	2.10857	0
CD4 T cell	4.35402	0	0	0	0	0	0	0	0	1.35053	0	0.361172	2.46794
CD4 T cell	2.84693	0	0	8.61483	0	0	0	0	0	0.928623	0	7.09888	3.35517
CD4 T cell	0	0	0	0	0	0	0	0	0	0	0	2.34378	0
CD4 T cell	0	0	0	0	0	0	0	0	0	0	0	0.70118	0
CD4 T cell	0	0	0	0	0	0	0	0	0	0	0	0	0
CD4 T cell	0	2.99289	0	0.475099	0	1.48873	0	0	0	0	0	5.50989	0
CD4 T cell	0	0	0	0	0	0	0	0	0	0	0	0.0787036	0
CD4 T cell	1.63491	0	3.46803	0	0	0	0	0	0	0	0	0	0
CD4 T cell	0	0	0	0	0	0	0	0	0	0	0	0.14147	0
CD4 T cell	0	0	0	0	0	0	0	0	0	0	0	0.218658	0
CD4 T cell	0	0	0	0	0	0	0	0	0	0	0	0	0
CD4 T cell	0	0	0	0	0	0	0	0	0	0	0	0	0
CD4 T cell	0	0	0	0	0	0	0	0	0	0	0	0.281671	8.52306
CD4 T cell	0	0	0	0	0	0	0	0	0	0	0	0	0
CD4 T cell	0	0	0	0	0	0	0	0	0	0	0	0.327846	0
CD4 T cell	0	0	0	0	0	0	0	0	0	0	0	0	0
CD4 T cell	0.858729	0	0	2.71483	0	0	0	0	0	0	0	0.409878	8.17803
CD4 T cell	0	0	0	0	0	0	0	0	0	0	0	0.207438	0
CD4 T cell	0	0	0	1.49631	0	0	0	0	0	0	0	0	0
CD4 T cell	2.78797	0	0	0.392452	0	0	0	0	0	0	0	0.291012	8.45959
CD4 T cell	0	0	0	0	0	0	0	0	0	0	0	0.0964825	0
CD4 T cell	0	0	0	0	0	0	0	0	3.44552	0	0	0.173858	2.87964
CD4 T cell	0	0	0	0	0	0	0	0	0	0	0	0.0924053	0
CD4 T cell	0	0	0	0	0	0	0	0	0	0	0	0	0
CD4 T cell	0	0	0	0	0	0	0	0	1.76727	0	0	0.121192	0
CD4 T cell	0	0	0	1.73782	0	0	0	0	0	0	0	5.73035	0
CD4 T cell	0	0	0	0	0	0	0	0	0	0	0	0.2403	0
CD4 T cell	0	0	0	0	0	0	0	0	0	0	0	0.296958	2.74916
CD4 T cell	2.13415	1.50242	0	0	0	0	0	0	0	0	0	0.127268	0
CD4 T cell	1.85024	0	0	0.328845	0	0	0	0	0	0	0	0.165037	8.18454
CD4 T cell	5.01283	0	0	0	0	0	0	0	0	0	0	0	0
CD4 T cell	2.04661	0	0	0	0	0	0	0	0	0	0	0.116758	0
CD4 T cell	2.76445	0	0	0	0	0	0	0	0	0	0	0	0
CD4 T cell	0	0	0	0	0	0	0	0	0	0	0	0.576353	0
CD4 T cell	0	0	0	0	0	0	0	0	0	0	0	1.01729	9.13
CD4 T cell	0	0	0	0	0	0	0	0	0	0	0	0.257825	9.88959
CD4 T cell	0	0	0	0	0	0	0	0	0	0	0	0.601611	10.1727
CD4 T cell	0.978353	0	0	8.47101	0	0	0	0	0	0	0	0.258951	9.78288
CD4 T cell	0.42107	0	0	0	0	0	0	0	0	0	5.20626	0.481086	0
CD4 T cell	0	0	0	0	0	0	0	0	0	0	0	0.233901	9.64048
CD4 T cell	0	0	0	2.5753	0	0	0	0	0	0	0	0.371687	1.99467
CD4 T cell	0	0	0	0.724097	0	0	0	0	0	0	0	0.30022	7.53341
CD4 T cell	0	0	0	0	0	0	0	0	2.20169	0	0	0	0
CD4 T cell	0	0	0	0	0	0	0	0	0	0	0	0	8.78592
CD4 T cell	0	0	0	1.00517	0	0	0	0	0	0	0	4.85552	7.90167
CD4 T cell	0	0	0	0.61598	0	0	0	0	0	0	0	0.588702	8.6334
CD4 T cell	0	0	0	0	0	0	0	0	0	1.33707	0	0.19155	0
CD4 T cell	0	0	0	0	0	0	0	0	0	0	0	0.191004	8.54439
CD4 T cell	0	0	0	0.374633	0	0	0	0	1.57017	1.33715	0	0.274867	6.34162
CD4 T cell	0	0	0	0	0	0	0	0	0	0	0	1.12114	0
CD4 T cell	4.21643	0	0	0	0	0	0	0	0	3.265	0	1.08706	4.17771
CD4 T cell	1.85991	0	0	2.26713	0	2.09594	0	0	0	2.32129	0	0	2.80562
CD4 T cell	0	0	0	0	0	1.92762	0	0	0	2.89259	0	0.105482	10.3386
CD4 T cell	0	0	0	0	0	0	0	0	0	2.74505	0	0	9.27269
CD4 T cell	0	0	0	1.42822	0	0	0	0	0	0	0	0.378988	0
CD4 T cell	0	0	0	0	0	2.89853	0	0	0	2.96646	0	0.23432	0
CD4 T cell	0	0	0	1.03317	0	0	0	0	0	2.18767	0	0	8.60995
CD4 T cell	7.82743	0	0	2.0284	0	1.77188	0	0	0	2.34583	0	0.163871	10.306
CD4 T cell	0	0	0	0	0	0	0	0	0	3.28597	0	0.258876	10.1621
CD4 T cell	0	0	0	0	0	0	0	0	0	0.839643	0	0.510621	9.83846
CD4 T cell	0	0	0	1.01282	0	0	0	0	4.983	3.2122	0	0.33463	8.96362
CD4 T cell	0	0	0	0	0	0	0	0	0	0	0	0.266828	2.33384
CD4 T cell	0	0	0	0.360838	0	0	0	0	0	2.24675	0	0.263108	1.70566
CD4 T cell	4.70431	0	3.63786	0.481397	0	0	0	0	0	0	0	0.128003	0
CD4 T cell	0	0	0	0	0	0	0	0	3.26586	2.64883	0	0	10.119
CD4 T cell	2.06951	0	0	0	0	0	0	0	0	1.60355	0	0.248872	3.07737
CD4 T cell	0	0	0	0	0	0	0	0	0	3.80657	0	0	0
CD4 T cell	0	0	0	0	0	0	0	0	1.56011	3.7727	0	0.178918	3.15595
CD4 T cell	1.89057	0	0	0.390275	0	0	0	0	1.61586	0	0	0.532645	0
CD4 T cell	0	0	0	0.773367	0	0	0	0	0	2.47113	0	0.115287	0
CD4 T cell	0	0.414058	0	0	0	0	0	0	0	3.82242	0	0.140336	2.95481
CD4 T cell	0	0	0	7.13724	0	0	0	0	1.91333	2.84312	0	0	2.86683
CD4 T cell	0	2.52697	0	0.88123	0	0	0	0	2.00251	3.1791	0	0	8.99224
CD4 T cell	0	0	0	7.56965	0	0	0	0	0	2.96359	0	0	0
CD4 T cell	0	0	0	0	0	0	0	0	0	1.92512	0	0.980018	8.44177
CD4 T cell	2.5481	0	0	0	0	0	0	0	0	3.0349	0	0.214721	3.92879
CD4 T cell	0	0	0	0	0	0	0	0	0	3.1149	0	0.350226	7.66158
CD4 T cell	4.22033	0	0	8.16834	0	0	0	0	0	0.98158	0	0.234859	9.17531
CD4 T cell	0	0	2.7428	0.379587	0	0	0	0	0	0.827114	0	0.502926	8.30381
CD4 T cell	0	0	4.03161	0	0	0	0	0	0	1.34239	5.62659	0.185865	9.02628
CD4 T cell	0	0	1.72215	0	0	0	0	0	0	2.01311	0	0.181328	2.35537
CD4 T cell	0	0	0	0	0	0	0	0	0	2.36146	0	0.939638	8.52606
CD4 T cell	0	0	0	0	0	0	0	0	0	3.47858	0	0.230833	2.32387
CD4 T cell	0	0	0	0	0	1.67276	0	0	1.81944	0	0	0.130635	10.3245
CD4 T cell	0	0	0	0	0	0	0	0	1.78936	2.85586	0	0	3.41258
CD4 T cell	0	0	0	0	0	0	0	0	0	2.8826	0	0.26101	10.0876
CD4 T cell	2.70304	0	0	0	0	0	0	0	0	2.04545	0	0.121677	2.61589
CD4 T cell	3.85628	0	0	0	0	3.2576	0	0	0	2.50199	0	0.893248	3.50256
CD4 T cell	2.2991	0	4.23273	0.46639	0	0	0	0	0	2.02395	0	0.123333	9.48084
CD4 T cell	3.49957	0	0	0	0	0	0	0	0	2.52493	0	0.336724	0
CD4 T cell	0	0.291655	3.12339	0	0	0	0	0	0	3.53601	0	0.499323	2.35645
CD4 T cell	1.39762	0	0	0	0	0	0	0	0	1.92363	0	0.0715927	8.27836
CD4 T cell	0	0	0	1.49107	0	0	0	0	0	2.41112	0	0.351374	2.22028
CD4 T cell	4.8013	0	0	3.15922	0	0	0	0	0	2.21877	0	2.58279	3.04641
CD4 T cell	0	0	0	2.36871	0	0	0	0	0	2.73534	0	0.538614	1.79311
CD4 T cell	0	0	0	0	0	2.2949	0	0	0	2.46683	0	0.371285	0
CD4 T cell	0	0	0	0.602221	0	0	0	0	1.50197	0	0	0	0
CD4 T cell	2.59816	0	0	0	0	0	0	0	0	0	0	0.205431	8.51162
CD4 T cell	1.17125	0	0	0.842205	0	0	0	0	0	0	0	0.458522	0
CD4 T cell	0	0	0	2.3284	0	0	0	0	0	0	0	0.088483	0
CD4 T cell	2.0627	0	0	0	0	0	0	0	0	0	0	0.0924539	0
CD4 T cell	0	0	0	0	0	0	0	0	0	0	0	8.64012	0
CD4 T cell	1.70921	0	0	0	0	0	0	0	0	0	0	0	0
CD4 T cell	0	0	0	4.87836	0	0	0	0	0	0	0	2.35264	0
CD4 T cell	0	0	0	0.380092	0	0	0	0	0	0	0	0	0
CD4 T cell	0	0	0	0	0	0	0	0	1.78494	0	0	0.619695	0
CD4 T cell	3.3469	0	0	2.01272	0	0	0	0	0	0	0	0.172562	0
CD4 T cell	0	0	0	0	0	0	0	0	1.61158	0	0	0.199044	0
CD4 T cell	0	0	0	0	0	0	0	0	0	0	0	0.200025	0
CD4 T cell	0	0	0	0	0	0	0	0	0	0	0	0.398104	0
CD4 T cell	0	0	0	1.52826	0	0	0	0	0	0	0	0	0
CD4 T cell	0	0	0	0	0	0	0	0	0	0	0	0.108005	0
CD4 T cell	0	0	0	0	0	0	0	0	0	0	0	0.195584	0
CD4 T cell	0	0	0	0.773616	0	0	0	0	0	0	0	0	0
CD4 T cell	0	0	0	0	0	0	0	0	0	0	0	5.89805	0
CD4 T cell	0	0	0	0	0	0	0	0	0	0	0	0.249943	0
CD4 T cell	0.441587	0	0	0	0	0	0	0	0	0	0	0.387437	0
CD4 T cell	0	0	0	0	0	0	0	0	0	0	0	0.725177	0
CD4 T cell	0	0	0	8.22553	0	0	0	0	0	0	0	0.122359	0
CD4 T cell	0	0	0	0	0	0	0	0	3.10887	0	0	0.250669	1.95294
CD4 T cell	4.80593	0	0	0	0	0	0	0	0	0	7.39147	0.264137	9.07811
CD4 T cell	3.89375	0	0	0	0	0	0	0	2.35025	0	0	0.38397	8.32789
CD4 T cell	2.03028	0	0	0.377278	0	0	0	0	0	0.832261	0	0.434523	0
CD4 T cell	3.19957	0	0	0	0	0	0	0	0	0	0	0.63478	0
CD4 T cell	0	0	0	0	0	0	0	0	0	0.803467	0	0.0937474	1.6883
CD4 T cell	0	0	0	5.14145	0	0	0	0	0	3.8211	0	0.157283	0
CD4 T cell	0	1.54917	0	1.97304	0	0	0	0	0	0.958755	0	0.227231	1.92757
CD4 T cell	3.41217	0	0	0.678826	0	0	0	0	0	2.66961	0	0.184124	9.58102
CD4 T cell	0	0	0	0.931797	0	0	0	0	0	1.91693	0	0.191591	3.26538
CD4 T cell	0	0	0	0	0	0	0	0	0	2.10339	0	4.18436	9.15936
CD4 T cell	0	1.7262	0	2.73961	0	0	0	0	0	3.08433	0	0.561687	3.79849
CD4 T cell	2.54328	0	0	4.00658	0	0	0	0	3.42441	3.44021	0	0.114372	0
CD4 T cell	0	0	0	8.63742	0	0	0	0	0	0	0	1.12553	10.861
CD4 T cell	4.9735	0	0	0.540342	0	0	0	0	0	2.05708	0	1.94888	8.90575
CD8 T cell	0	0	0	0	0	0	0	0	0	0.728493	0	0.924264	0
CD8 T cell	0	0	0	0	0	0	0	0	0	0	0	0	0
CD8 T cell	0	0	0	0	0	0	0	0	0	0	0	0.292669	2.05695
CD8 T cell	0	0	0	0	0	0	0	0	0	0	0	0.444686	0
CD8 T cell	4.78322	0	0	0	0	0	0	0	0	0	0	0	0
CD8 T cell	0	0	0	0	0	0	0	0	0	0	0	0	7.45133
CD8 T cell	0	0	0	0	0	0	0	0	0	0	0	0	0
CD8 T cell	0	0	0	0	0	0	0	0	0	0	0	0	8.46182
CD8 T cell	0	0	0	0	0	0	0	0	0	0	0	8.34668	8.01933
CD8 T cell	0	0	0	0	0	0	0	0	0	0	0	8.34974	0
CD8 T cell	0	0	0	0	0	0	0	0	0	0	0	0.209895	0
CD8 T cell	0	0	0	0	0	0	0	0	0	0	0	0	8.09603
CD8 T cell	0	0	0	3.18652	0	0	0	0	0	0	0	0.271768	0
CD8 T cell	0	3.55917	0	0	0	0	0	0	0	0	0	0	0
CD8 T cell	0	0	0	0	0	0	0	0	0	0	0	0	0
CD8 T cell	4.49066	0	0	0	0	0	0	0	0	0	0	0.318022	8.47866
CD8 T cell	0	0	0	0	0	0	0	0	0	0	0	0	0
CD8 T cell	0	0	0	0	0	0	0	0	0	0	0	0.873545	0
CD8 T cell	0	0	0	0	0	0	0	0	0	0	0	0	0
CD8 T cell	0	0	0	0	0	0	0	0	0	0	0	8.65705	0
CD8 T cell	0	0	0	0	0	0	0	0	0	5.8325	0	8.12183	0
CD8 T cell	0	0	0	0	0	0	0	0	0	0	0	0	0
CD8 T cell	3.01811	0	0	0	0	0	0	0	0	0	0	0	0
CD8 T cell	0	0	0	0	0	0	0	0	0	0	0	0.260961	0
CD8 T cell	0	0	0	0	0	0	0	0	0	0	0	0	0
CD8 T cell	0	0	0	0.944156	0	0	0	0	0	0	0	0	0
CD8 T cell	5.01477	0	0	0	0	0	0	0	0	0	0	0	0
CD8 T cell	0	0	0	4.3002	0	0	0	0	0	0	0	0	0
CD8 T cell	0	0	0	0	0	0	0	0	0	0	0	0	0
CD8 T cell	0	0	0	4.35918	0	0	0	0	0	0	0	4.7654	0
CD8 T cell	0	0	0	0	0	0	0	0	0	0	0	0.207131	0
CD8 T cell	3.87896	0	0	0	0	0	0	0	0	0	0	0	0
CD8 T cell	0	0	0	0	0	0	0	0	0	0	0	0.256195	0
CD8 T cell	0	0	0	0	0	0	0	0	0	0	0	0	0
CD8 T cell	0	0	0	0	0	0	0	0	5.70577	0	0	0	0
CD8 T cell	0	0	0	0	0	0	0	0	0	0	0	0	0
CD8 T cell	0	0	0	0	0	0	0	0	0	0	0	7.80114	8.39656
CD8 T cell	0	0	0	0	0	0	0	0	0	0	0	0.157592	0
CD8 T cell	0	0	0	0	0	0	0	0	0	0	0	0	0
CD8 T cell	0	2.51101	0	3.74379	0	0	0	0	0	0	0	0	0
CD8 T cell	0	0	0	1.41045	0	0	0	0	0	0	0	0	0
CD8 T cell	0	0	0	5.13532	0	0	0	0	0	0	0	8.03346	0
CD8 T cell	0	0	0	0	0	0	0	0	0	0	0	9.60878	8.50285
CD8 T cell	0	0	0	0	0	0	0	0	0	0	0	0.616571	3.24449
CD8 T cell	0	0	0	1.9686	0	0	0	0	4.60021	0	0	0	0
CD8 T cell	5.57442	0	0	1.94592	0	0	0	0	0	0	0	1.15381	0
CD8 T cell	0	0	0	4.41275	0	0	0	0	0	0	0	0	0
CD8 T cell	0	0	0	0	0	0	0	0	0	0	0	10.4523	0
CD8 T cell	3.39017	0	0	1.98507	0	0	0	0	0	0	0	0	0
CD8 T cell	0	0	0	2.02205	0	0	0	0	0	0	0	1.27537	7.3137
CD8 T cell	0	0	0	0	0	0	0	0	0	0	0	8.37632	0
CD8 T cell	0	0	0	0	0	0	0	0	0	0	0	0.43461	0
CD8 T cell	0	0	0	0	0	0	0	0	0	0	0	1.05611	0
CD8 T cell	0	0	0	0	0	0	0	0	0	0	0	0.305512	0
CD8 T cell	0	0	0	0	0	0	0	0	0	0	0	0	0
CD8 T cell	0	0	0	0	0	0	0	0	0	0	0	8.76326	0
CD8 T cell	0	0	0	1.95754	0	0	0	0	0	0	0	7.80961	0
CD8 T cell	0	0	0	0	0	0	0	0	0	0	0	6.39366	0
CD8 T cell	0	4.2182	0	0	0	0	0	0	0	0	0	7.37731	7.58393
CD8 T cell	0	0	0	0	0	0	0	0	0	0	0	0	0
CD8 T cell	0	0	0	0	0	0	0	0	0	0	0	5.96124	0
CD8 T cell	0	0	0	0	0	0	0	0	0	0	0	0	0
CD8 T cell	0	0	0	0	0	0	0	0	0	0	0	0	0
CD8 T cell	0	0	0	0	0	0	0	0	0	0	0	0	0
CD8 T cell	0	0	0	0	0	0	0	0	0	0	0	6.41202	0
CD8 T cell	0	0	0	0	0	0	0	0	0	0	0	0	8.32214
CD8 T cell	0	0	0	0	0	0	0	0	0	0	0	0	0
CD8 T cell	0	0	0	3.13288	0	0	0	0	0	0	0	5.08215	0
CD8 T cell	2.62778	0	0	0	0	0	0	0	0	0	0	0	0
CD8 T cell	2.93891	0	0	0	0	0	0	0	0	0	0	0	0
CD8 T cell	4.77982	0	0	0	0	0	0	0	0	0	0	0.235373	8.88504
CD8 T cell	0	0	0	0	0	0	0	0	0	0	0	0	0
CD8 T cell	0	0	0	0	0	0	0	0	0	0	0	0	0
CD8 T cell	6.01726	0	0	0	0	0	0	0	0	0	0	0.340803	7.96216
CD8 T cell	0	0	0	0	0	0	0	0	0	0	0	0	7.64844
CD8 T cell	0	0	0	0	0	0	0	0	0	0	0	0	7.47057
CD8 T cell	0	0	0	5.10101	0	0	0	0	0	0	0	0	0
CD8 T cell	6.11878	0	0	0	0	0	0	0	0	0	0	0.677908	0
CD8 T cell	0	0	0	0	0	0	0	0	0	0	0	8.15127	0
CD8 T cell	0	0	0	1.84129	0	0	0	0	4.37796	0	0	0	0
CD8 T cell	0	0	0	0	0	0	0	0	0	0	0	6.28997	8.36581
CD8 T cell	0	0	0	1.52974	0	0	0	0	0	0	0	4.97487	0
CD8 T cell	0	0	0	0	0	0	0	0	0	0	0	0	0
CD8 T cell	0	0	0	0	0	0	0	0	0	0	0	0	0
CD8 T cell	0	0	0	0	0	0	0	0	0	0	0	0	1.23588
CD8 T cell	0	0	0	0	0	0	0	0	0	0	0	0	0
CD8 T cell	0	0	0	0	0	0	0	0	0	0	0	3.45036	0
CD8 T cell	0	0	0	0	0	0	0	0	0	0	0	8.02655	0
CD8 T cell	0	0	0	0	0	0	0	0	0	0	0	0.185285	0
CD8 T cell	0	0	0	0	0	0	0	0	0	0	0	10.0355	4.66206
CD8 T cell	0	0	0	0	0	0	0	0	0	0	0	0	0
CD8 T cell	3.90126	0	0	0	0	0	0	0	0	0	0	5.99268	0
CD8 T cell	0	0	0	0	0	0	0	0	0	0	0	0	0
CD8 T cell	0	0	0	1.8032	0	0	0	0	0	0	0	0	7.85493
CD8 T cell	0	0	0	0	0	0	0	0	0	0	0	5.94656	0
CD8 T cell	0	0	0	0	0	0	0	0	0	0	0	4.16366	0
CD8 T cell	0	0	0	1.79471	0	0	0	0	0	0	0	0.229439	0
CD8 T cell	0	0	0	0	0	0	0	0	0	0	0	8.36324	0
CD8 T cell	0	0	0	0	0	0	0	0	0	0	0	0	0
CD8 T cell	0	0	0	0	0	0	0	0	0	0	0	8.0589	7.34444
CD8 T cell	0	0	0	0	0	0	0	0	0	0	0	0	0
CD8 T cell	0	0	0	0	0	0	0	0	0	0	0	0	0
CD8 T cell	0	0	0	1.26603	0	0	0	0	0	0	0	9.65662	0
CD8 T cell	0	0	0	0	0	0	0	0	0	0	0	8.8439	0
CD8 T cell	0	0	0	0	0	0	0	0	0	0	0	0	0
CD8 T cell	0	0	0	0	0	0	0	0	0	0	0	0.354951	0
CD8 T cell	3.30775	0	0	0	0	0	0	0	0	0	0	0	0
CD8 T cell	0	0	0	0	0	0	0	0	0	0	0	4.41434	0
CD8 T cell	6.71868	0	0	0	0	0	0	0	0	0	0	0	0
CD8 T cell	0	0	0	0	0	0	0	0	0	0	0	0.261905	0
CD8 T cell	0	0	0	0	0	0	0	0	0	0	0	7.55412	0
CD8 T cell	0	0	0	0	0	0	0	0	0	0	0	6.53304	0
CD8 T cell	0	0	0	0	0	0	0	0	0	0	0	7.05158	0
CD8 T cell	0	0	0	0	0	0	0	0	0	0	0	0.173081	0
CD8 T cell	0	0	0	0	0	0	0	0	0	0	0	7.52279	0
CD8 T cell	0	0	0	0	0	0	0	0	0	0	0	0.512802	0
CD8 T cell	0	0	0	0	0	0	0	0	0	0	0	0	0
CD8 T cell	0	0	0	0	0	0	0	0	0	0	0	0.23057	0
CD8 T cell	0	0	0	0	0	0	0	0	0	0	0	3.63652	0
CD8 T cell	0	0	0	1.44753	0	0	0	0	0	0	0	2.85278	0
CD8 T cell	3.89202	0	0	0	0	0	0	0	4.1853	0	0	7.95947	0
CD8 T cell	3.11515	4.40365	0	0	0	0	0	0	0	0	0	5.10814	0
CD8 T cell	0	0	0	0	0	0	0	0	0	0	0	0	8.74031
CD8 T cell	0	0	0	0	0	0	0	0	0	0	0	0	0
CD8 T cell	6.41877	0	0	0	0	0	0	0	0	0	0	0.25067	0
CD8 T cell	0	0	0	0	0	0	0	0	0	7.82353	0	0	0
CD8 T cell	0	0	0	0	0	0	0	0	0	0	0	0	0
CD8 T cell	0	0	0	0	0	0	0	0	0	0	0	7.45848	4.46628
CD8 T cell	3.43393	0	0	0	0	0	0	0	0	0	0	0	0
CD8 T cell	0	0	0	2.02005	0	0	0	0	0	0	0	0	7.03438
CD8 T cell	1.11731	0	0	0	0	0	0	0	0	0	0	0.425881	3.13877
CD8 T cell	0	0	0	0	0	0	0	0	0	0	0	6.94879	0
CD8 T cell	0	0	0	0	0	0	0	0	0	0	0	0	0
CD8 T cell	0	0	0	1.22551	0	0	0	0	0	0	0	0.318758	0
CD8 T cell	0	0	0	0.783303	0	0	0	0	0	0	0	0.338562	0
CD8 T cell	0	0	0	0	0	0	0	0	0	0	0	0.325403	0
CD8 T cell	0	0	0	0.84417	0	0	0	0	0	0	0	0	0
CD8 T cell	0	0	0	0	0	0	0	0	0	0	0	8.80648	0
CD8 T cell	3.37762	0	0	0	0	0	0	0	0	0	0	0.346102	0
CD8 T cell	0	0	0	0	0	0	0	0	0	0	0	0	8.67198
CD8 T cell	0	0	0	0	0	0	0	0	0	0	0	0.339256	0
CD8 T cell	0	0	0	0	0	0	0	0	0	0	0	0	0
CD8 T cell	0	0	0	0	0	0	0	0	0	0	0	0	0
CD8 T cell	0	0	0	0	0	0	0	0	0	0	0	0	0
CD8 T cell	0	0	0	0	0	0	0	0	0	0	0	0	0
CD8 T cell	0	0	0	0	0	0	0	0	0	0	0	0	0
CD8 T cell	0	0	0	0	0	0	0	0	0	0	0	0	0
CD8 T cell	0	0	0	1.23235	0	0	0	0	0	0	0	6.48169	0
CD8 T cell	0	0	0	0	0	0	0	0	0	0	0	3.42394	3.53536
CD8 T cell	0	0	0	0	0	0	0	0	0	0	0	0	5.79471
CD8 T cell	0	0	0	0	0	0	0	0	0	0	0	0	0
CD8 T cell	0	0	0	0	0	0	0	0	0	0	0	0	0
CD8 T cell	0	0	0	0	0	0	0	0	0	0	0	0.466543	7.55645
CD8 T cell	0	0	0	0	0	0	0	0	0	0	0	0	0
CD8 T cell	0	0	0	0	0	0	0	0	0	0	0	0.588798	0
CD8 T cell	6.38589	0	0	3.59011	0	0	0	0	2.9807	0	0	0.403315	7.9801
CD8 T cell	0	0	0	0	0	0	0	0	0	0	0	0	0
CD8 T cell	0	0	0	0	0	0	0	0	0	0	0	0	0
CD8 T cell	0	0	0	0	0	0	0	0	0	0	0	1.17149	0
CD8 T cell	0	0	0	0	0	0	0	0	0	0	0	0	0
CD8 T cell	0	0	1.97219	0	0	0	0	0	0	0	0	0	7.11204
CD8 T cell	0	0	0	0	0	0	0	0	0	0	0	7.05987	0
CD8 T cell	3.68433	0	0	0	0	0	0	0	0	0	0	0.387207	0
CD8 T cell	0	0	0	0.87245	0	0	0	0	0	0	0	0	0
CD8 T cell	0	0	0	1.51998	0	0	0	0	0	0	0	4.2128	0
CD8 T cell	0	0	0	0	0	0	0	0	0	0	0	0	0
CD8 T cell	5.63199	0	0	0	0	0	0	0	0	0	0	0	0
CD8 T cell	0	0	0	0	0	0	0	0	0	0	0	0.320485	0
CD8 T cell	0	0	0	0	0	0	0	0	0	0	0	0.386075	0
CD8 T cell	0	0	0	0	0	0	0	0	3.4136	0	0	7.28602	0
CD8 T cell	0	0	0	0	0	0	0	0	0	3.08618	0	6.86215	2.75547
CD8 T cell	4.25632	0	0	0	0	0	0	0	0	0	0	0	0
CD8 T cell	4.17946	0	0	0	0	0	0	0	0	0	0	0	5.04317
CD8 T cell	0	0	0	0	0	0	0	0	0	0	0	0.996223	0
CD8 T cell	0	0	0	0	0	0	0	0	0	0	0	0.58877	0
CD8 T cell	0	0	0	0	0	0	0	0	3.10203	0	0	1.02241	0
CD8 T cell	0	0	0	0	0	0	0	0	0	0	0	8.04871	0
CD8 T cell	3.84402	0	0	2.52093	0	0	0	0	3.24535	0	0	0	0
CD8 T cell	0	0	0	0	0	0	0	0	0	0	0	0	2.49296
CD8 T cell	4.11857	0	0	0	0	0	0	0	0	0	0	0.428385	0
CD8 T cell	0	0	0	0	0	0	0	0	5.23791	0	0	0.317143	0
CD8 T cell	3.20758	0	0	0	0	0	0	0	0	0	0	0	0
CD8 T cell	5.0504	0	0	0	0	0	0	0	0	0	0	0	0
CD8 T cell	0	0	0	0	0	0	0	0	0	0	0	0.538581	0
CD8 T cell	0	0	0	0	0	0	0	0	2.87845	0	0	0.362286	0
CD8 T cell	0	0	0	2.32234	0	0	0	0	0	0	0	0	0
CD8 T cell	0	0	0	0	0	0	0	0	0	0	0	0	3.35568
CD8 T cell	0	0	0	1.47072	0	0	0	0	4.58602	0	0	0.285332	0
CD8 T cell	0	0	0	0	0	0	0	0	0	0	0	0	0
CD8 T cell	0	0	0	0	0	0	0	0	0	0	0	0	0
CD8 T cell	0	0	0	0	0	0	0	0	0	0	0	7.20365	0
CD8 T cell	3.56323	0	0	0	0	0	0	0	0	0	0	0	0
CD8 T cell	0	0	0	0	0	0	0	0	0	0	0	0	0
CD8 T cell	0	0	0	0	0	0	0	0	0	0	0	0.976711	0
CD8 T cell	0	0	0	0	0	0	0	0	0	0	0	0	0
CD8 T cell	0	0	0	0	0	0	0	0	0	0	0	0.459616	0
CD8 T cell	4.32211	0	0	0	0	0	0	0	0	0	0	0	0
CD8 T cell	0	0	0	0	0	0	0	0	0	0	0	0	0
CD8 T cell	0	0	0	0	0	0	0	0	0	0	0	0.408093	0
CD8 T cell	0	0	0	0	0	0	0	0	0	0	0	0.36548	0
CD8 T cell	0	0	0	0.777818	0	0	0	0	4.79537	0	0	1.50402	0
CD8 T cell	3.79277	0	0	0	0	0	0	0	0	0	0	0	7.07448
CD8 T cell	0	0	0	0	0	0	0	0	0	0	0	0	0
CD8 T cell	0	0	0	0	0	0	0	0	0	0	0	0	0
CD8 T cell	0	0	0	0	0	0	0	0	0	0	0	0.370409	0
CD8 T cell	0	0	0	0	0	0	0	0	0	0	0	1.22783	0
CD8 T cell	0	0	0	0	0	0	0	0	0	0	0	10.7869	0
CD8 T cell	4.2928	0	0	0	0	0	0	0	0	0	5.91626	0	0
CD8 T cell	0	0	0	2.60611	0	0	0	0	0	0	0	0.538707	0
CD8 T cell	0	0	0	0.734655	0	0	0	0	2.66003	0	0	6.11977	0
CD8 T cell	0	0	0	0	0	0	0	0	0	0	0	10.3906	0
CD8 T cell	4.45117	0	0	0	0	0	0	0	0	0	0	0	7.5408
CD8 T cell	3.99683	0	0	0	0	0	0	0	0	0	0	0.977524	0
CD8 T cell	0	0	0	0	0	0	0	0	0	0	0	8.40003	0
CD8 T cell	0	0	0	0	0	0	0	0	0	0	0	0	0
CD8 T cell	0	0	0	3.2355	0	0	0	0	0	0	0	0	0
CD8 T cell	0	0	0	3.85686	0	0	0	0	0	0	0	4.66415	10.0195
CD8 T cell	4.72208	0	0	2.24729	0	0	0	0	0	0	0	0.305853	5.95826
CD8 T cell	3.91197	0	0	0	0	0	0	0	0	0.679937	0	0.351138	9.85895
CD8 T cell	0	0	0	0.551565	0	0	0	0	0	0	0	0.510824	0
CD8 T cell	2.77418	0	0	4.44515	0	0	0	0	0	0	0	0.617195	2.15749
CD8 T cell	3.11513	0	0	0	0	0	0	0	0	0	0	0.139435	0
CD8 T cell	0	0	0	0	0	0	0	0	0	0	0	0	0
CD8 T cell	0	0	0	0	0	0	0	0	0	0	0	0.155522	1.87465
CD8 T cell	0	0	0	0	0	2.21558	0	0	0	0	0	0.665632	0
CD8 T cell	0	0	0	0	0	0	0	0	0	0	0	0	0
CD8 T cell	0	0	0	0	0	0	0	0	0	0	0	0.529152	9.26942
CD8 T cell	0	0	0	0	0	0	0	0	0	0	0	0.132857	0
CD8 T cell	4.29162	0	0	0	0	0	0	0	2.14687	0	0	0.153	1.97002
CD8 T cell	0	0	0	0	0	0	0	0	0	0	0	0.149292	0
CD8 T cell	0	0	0	0	0	0	0	0	0	0.277913	0	0.129358	1.84158
CD8 T cell	0	0	0	0.438871	0	0	0	0	0	0	0	0.640211	0
CD8 T cell	3.70029	0	0	0	0	0	0	0	0	0	0	0.274662	8.01127
CD8 T cell	0.00204898	0	0	0	0	0	0	0	0	0	0	0.742982	2.00389
CD8 T cell	0	0	0	0	0	0	0	0	0	0	0	0.196725	0
CD8 T cell	0	0	0	0	0	0	0	0	0	0	0	0	0
CD8 T cell	0	0	0	0	0	0	2.14599	0	0	0	0	0.367361	1.89361
CD8 T cell	0	0	0	0	0	0	0	0	0	0	0	0.304398	6.33376
CD8 T cell	0	0	0	0	0	0	0	0	0	0	0	0	0
CD8 T cell	0	0	0	0	0	0	0	0	0	0	0	2.72353	1.77012
CD8 T cell	2.78478	0	0	0	0	0	0	0	0	0	0	0	0
CD8 T cell	0	0	0	0.490033	0	0	0	0	0	0	0	1.01398	2.18254
CD8 T cell	3.77581	0	0	0	0	0	0	0	0	0	0	0	0
CD8 T cell	0	0	0	0	0	0	0	0	0	0	0	0.331322	0
CD8 T cell	0	0	0	0	0	0	0	0	0	0	0	0.148473	0
CD8 T cell	1.12389	0	0	0	0	0	0	0	0	0	0	0.283956	6.3236
CD8 T cell	0	0	0	0.508928	0	0	0	0	0	0	0	0.326439	2.14557
CD8 T cell	2.78507	0	0	0	0	0	0	0	0	0	0	0.151458	1.90104
CD8 T cell	0	0	0	0	0	0	0	0	0	0	0	0	0
CD8 T cell	5.42077	0	0	0	0	0	0	0	1.77044	0	0	0	0
CD8 T cell	0	0	0	0	0	0	0	0	0	0	0	0.152812	1.39578
CD8 T cell	2.88392	0	0	0	0	0	0	0	0	0	0	0.304581	0
CD8 T cell	6.57991	0	0	1.11358	0	0	0	0	1.82758	0	0	0	0
CD8 T cell	0	0	0	0	0	0	0	0	0	0	0	0.166191	0
CD8 T cell	2.8411	0	0	0	0	0	0	0	0	0	0	0	0
CD8 T cell	4.85353	0	0	0	0	0	0	0	0	0	0	0.279542	0
CD8 T cell	3.55461	0	0	0.556967	0	0	0	0	0	0	0	0.193179	0
CD8 T cell	0	0	0	0	0	0	0	0	0	0	0	0.181012	0
CD8 T cell	0	0	0	0	0	0	0	0	0	0	0	0	0
CD8 T cell	0	0	0	0	0	0	0	0	0	0	0	0.389563	0
CD8 T cell	0	0	0	0	0	0	0	0	0	0	0	0	0
CD8 T cell	0	0	0	0	0	0	0	0	1.60556	0	0	0.135461	0
CD8 T cell	0	0	0	0	0	0	0	0	0	0	0	0.171692	0
CD8 T cell	0	0	0	0	0	0	0	0	0	0	0	0	2.26036
CD8 T cell	2.20914	0	0	0	0	0	0	0	0	0	0	0.362791	0
CD8 T cell	0	0	0	0	0	0	0	0	0	0	0	0	0
CD8 T cell	2.86201	0	0	0	0	0	0	0	0	0	0	0.295335	0
CD8 T cell	3.80604	0	0	1.90087	0	0	0	0	0	0	0	0.167239	0
CD8 T cell	0	0	0	0	0	0	0	0	0	0	0	0	8.54846
[truncated: 3,223 more rows]

## Sheet: Mean_expression_cell_population
Supplementary Data 2
Mean expression values per cell population in transcripts per million (TPM) of 5,520 cells derived from colorectal tumors as reported by Zhang et al. Cell. 2020;181(2):442-59 e29.
	C3	C4BPA	CFB	CFP	CHGA	ECM1	PF4	PPBP	SAA2	SERPINA1	SERPIND1	THBS1	TIMP1
B cell	0.878414	0.0258633	0.259724	0.419009	0.0700013	0.0772803	0.0390135	0.0483291	0.144238	0.444793	0.0522995	1.12468	2.52851
CD4 T cell	0.740954	0.103429	0.0348396	0.550854	0.00834041	0.0517086	0	0.0396953	0.174984	0.219404	0.0425283	0.69042	3.23967
CD8 T cell	0.783614	0.0983301	0.0235626	0.423192	0.0154758	0.00903293	0.00203026	0.0158214	0.227166	0.199139	0.0619656	0.95882	1.27772
Epithelial cell	1.3034	0.0534258	1.1733	0.302616	0.121249	0.450104	0.16306	0.258657	0.297903	1.01616	0.0243112	2.61812	3.45798
Fibroblast	3.20306	0.132221	2.9752	0.251221	0.107699	4.85993	0.086771	0.0774023	0.238187	0.58203	0.103298	8.2863	11.5575
ILC	0.556417	0.0248369	0.0800047	0.310547	0	0.0292234	0.0620759	0.0795396	0.12915	0.53061	0.0518358	1.23085	2.43336
Malignant cell	1.35738	0.781279	3.97882	0.355218	0.0288751	1.14016	0.146934	0.0259686	0.329018	6.94714	0.424943	2.42169	8.94124
Myeloid cell	2.36021	0.129661	0.232412	2.00281	0.0357873	0.350665	0.0512611	0.106418	0.245438	5.03651	0.157963	2.14236	8.63525

## Sheet: Z-scores_signature_inclusion
Supplementary Data 2
Z-scores of mean gene expression values per cell population; mean expression values were standardized by gene (columns). Cells derived from colorectal tumors as reported by Zhang et al. Cell. 2020;181(2):442-59 e29.
	C3	C4BPA	CFB	CFP	CHGA	ECM1	PF4	PPBP	SAA2	SERPINA1	SERPIND1	THBS1	TIMP1
B cell	-0.600783	-0.607585	-0.579644	-0.289304	0.500519	-0.512556	-0.526719	-0.45604	-1.19611	-0.585496	-0.506333	-0.566489	-0.760054
CD4 T cell	-0.759745	-0.277485	-0.735754	-0.047776	-0.930096	-0.529069	-1.21445	-0.574815	-0.730721	-0.677961	-0.585375	-0.754353	-0.562089
CD8 T cell	-0.710413	-0.299183	-0.743582	-0.281643	-0.764545	-0.556627	-1.17866	-0.903246	0.0591109	-0.686275	-0.428142	-0.638241	-1.10824
Epithelial cell	-0.109317	-0.490285	0.0545392	-0.502528	1.68953	-0.271804	1.65997	2.43742	1.12981	-0.351095	-0.732737	0.0795839	-0.501319
Fibroblast	2.0875	-0.154951	1.30538	-0.596678	1.37516	2.57586	0.315147	-0.0560824	0.22593	-0.529195	-0.0937949	2.53168	1.75332
ILC	-0.97315	-0.611953	-0.704401	-0.487999	-1.1236	-0.543589	-0.120177	-0.0266791	-1.42449	-0.55029	-0.510085	-0.520558	-0.786541
Malignant cell	-0.0468967	2.60729	2.00207	-0.406164	-0.453664	0.173802	1.37571	-0.763652	1.60078	2.08207	2.50806	-0.00539325	1.02505
Myeloid cell	1.11281	-0.165845	-0.598604	2.61209	-0.293292	-0.336017	-0.310821	0.343091	0.335689	1.29824	0.348403	-0.126232	0.939869
	Inclusion in signature based on Z-score >1.5
		Stromal signature
		Epithelial signature
